# Supplementary material for: Stable Salts of Heteroleptic Iron Carbonyl/Nitrosyl Cations
Source: PubMed Central journal article supplement — Angew Chem Int Ed Engl. 2020 Jan 24;59(14):5581–5. doi: 10.1002/anie.201915942 (PMC7154531; doi:10.1002/anie.201915942), 2020-01-24
Supplement: ANIE-59-5581-s001.pdf [file ANIE-59-5581-s001.pdf]

Supporting Information

**Stable Salts of Heteroleptic Iron Carbonyl/Nitrosyl Cations**

*Jan Bohnenberger and Ingo Krossing\**

anie\_201915942\_sm\_miscellaneous\_information.pdf

## Table of Contents

|                                                                                |    |
|--------------------------------------------------------------------------------|----|
| 1. Supplementary Methods.....                                                  | 2  |
| 2. Detailed Synthesis, Characterization and Spectra of Compounds 1 and 2 ..... | 5  |
| 3. Glassware used and Pictures of compounds 1 and 2.....                       | 17 |
| 4. Vibrational Analysis.....                                                   | 18 |
| 5. Powder XRD Data.....                                                        | 19 |
| 6. UV/VIS Spectra.....                                                         | 21 |
| 7. Discussion of the Existence of “[Fe(CO) <sub>5</sub> (NO)]Cl” .....         | 23 |
| 8. Single-Crystal XRD Data of Compounds 1 and 2 .....                          | 26 |
| 9. Additional Information on the DFT Calculations .....                        | 51 |
| 10. References .....                                                           | 59 |

### 1. Supplementary Methods

**General Conditions.** All manipulations on substrates and products were undertaken in a MBraun glovebox filled with Ar or N<sub>2</sub> (O<sub>2</sub>, H<sub>2</sub>O < 1 ppm). All experiments were carried out in special double-Schlenk tubes<sup>[1]</sup> (Supplementary Figure 19) separated by a G3 or G4 frit with grease-free PTFE or glass valves in an inert atmosphere using vacuum and standard Schlenk techniques. Solvents were dried by standard methods using CaH<sub>2</sub> or P<sub>4</sub>O<sub>10</sub>, distilled prior to use and stored over activated molecular sieves. 1,2,3,4-tetrafluorobenzene (TFB) was additionally stirred over Ag[Al(OR<sup>F</sup>)<sub>4</sub>] to remove less fluorinated arene-impurities. NO[F-{Al(OR<sup>F</sup>)<sub>3</sub>}<sub>2</sub>] {R<sup>F</sup> = C(CF<sub>3</sub>)<sub>3</sub>} was prepared from NO[PF<sub>6</sub>] (Acros) and Me<sub>3</sub>Si-F-Al(OR<sup>F</sup>)<sub>3</sub><sup>[2]</sup> according to literature.<sup>[3]</sup>

**NMR Spectroscopy.** NMR samples were prepared in 5 mm thick walled NMR tubes with J. Young valves. The <sup>1</sup>H, <sup>13</sup>C{<sup>1</sup>H}, <sup>19</sup>F and <sup>27</sup>Al spectra were recorded either on a Bruker Avance II+ 400 MHz, on a Bruker Avance III HD 300 MHz or on a Bruker Avance 200 MHz spectrometer either in 1,2-F<sub>2</sub>C<sub>6</sub>H<sub>4</sub> (*ortho*-difluorobenzene, *o*DFB) at r.t. Measurements conducted in 1,2-F<sub>2</sub>C<sub>6</sub>H<sub>4</sub> were calibrated by using the <sup>19</sup>F signal of the solvent 1,2-F<sub>2</sub>C<sub>6</sub>H<sub>4</sub> ( $\delta^F = -139.0$  ppm<sup>[4]</sup>, rel. to CCl<sub>3</sub>F). The field corrections of other nuclei were adjusted accordingly.

The Bruker Topspin software package (version 3.2) was used for measuring and processing of the spectra. Typically, very tiny impurities were detected in the  $^{19}\text{F}$  NMR at  $-74.8$  ( $\text{HOC}(\text{CF}_3)_3$ ) and  $-75.5$  ppm. All graphical representations were done with Topspin (version 4.0.6).

**Vibrational Spectroscopy.** FTIR measurements were performed on a FTIR Bruker ALPHA with a QuickSnap Platinum ATR sampling module inside the glovebox. The data were processed with the Bruker OPUS 7.5 software package. Unless otherwise stated, the spectra were recorded in the range of  $4000\text{-}550\text{ cm}^{-1}$  with a resolution of  $2\text{ cm}^{-1}$  at r.t. and a base line correction with 3 iterations was applied. FT Raman spectra were recorded on a Bruker VERTEX 70 spectrometer equipped with a RAM II module (1064 nm exciting line of a NdYAG laser) by using a highly sensitive liquid  $\text{N}_2$  cooled Ge detector. The samples were measured in flame sealed soda-lime glass Pasteur pipettes in the range of  $4000\text{-}50\text{ cm}^{-1}$  with a resolution of  $4\text{ cm}^{-1}$  at r.t. The data were processed with the Bruker OPUS 7.5 software package. Unless otherwise noted, the Raman spectra were cut off below  $75\text{ cm}^{-1}$  and a baseline correction with 5 iterations was applied. All IR and Raman spectra were normalized to 1 and intensities are given as follows: vvw = very very weak ( $< 0.1$ ), vw = very weak ( $< 0.2$ ), w = weak ( $< 0.3$ ), mw = medium weak ( $< 0.4$ ), m = medium ( $< 0.5$ ), ms = medium strong ( $< 0.6$ ), s = strong ( $< 0.7$ ), vs = very strong ( $< 0.8$ ), vvs = very very strong ( $\geq 0.9$ ). Extremely weak bands ( $< 0.025$ ) are not reported. Typical artefacts in the Raman spectra appear at about  $2939$  and  $2757\text{ cm}^{-1}$ , especially for weakly scattering samples. Graphical representations were done with OPUS 7.5 or with OriginPro (version 9.2).

**UV/Vis spectroscopy.** Solution UV/VIS spectra were recorded on a Varian Cary® 50 UV-Vis spectrophotometer in quartz cuvettes (thickness 1 mm) in *o*DFB solution and a concentration of about 1 mM.

**Single-Crystal X-ray Diffraction.** Single crystals were selected at r.t. under perfluoropolyalkylether oil (AB128330, ABCR GmbH & Co. KG) on 0.1, 0.2 or 0.3 mm micromounts (M1-L19-100/200/300). Structural data were collected from shock-cooled crystals on a Bruker SMART APEX II Quazar CCD area detector diffractometer using a D8 goniometer with an Incoatec Mo-Microfocus Source  $\text{I}\mu\text{S}$  with mirror-monochromated  $\text{Mo-K}\alpha$  radiation ( $\lambda = 0.71073\text{ \AA}$ ) at  $100(2)\text{ K}$ . The diffractometer was equipped with an Oxford Cryosystem 800 low temperature device. The data were processed with APEX v2013.6-2, integrated with SAINT<sup>[5]</sup> (V8.37A) and an empirical absorption correction using SADABS 2014/5<sup>[6]</sup> or SADABS 2016/2<sup>[6]</sup> was applied. The structures were solved by direct methods using SHELXT<sup>[7,8]</sup>. Unless otherwise stated, all non-hydrogen atoms were refined

anisotropically by full matrix least squares methods against weighted  $F^2$  values based on all independent reflections by using SHELXL-2014/7<sup>[8,9]</sup> with ShelXle as GUI software<sup>[10]</sup>. Disordered fragments were modelled with the help of the DSR software<sup>[11]</sup>. The graphical presentation of crystal structures was prepared either with Mercury (version 3.9)<sup>[12]</sup> or with OLEX2 (version 1.2)<sup>[13]</sup>. CCDC codes 1962273, 1962274 and 1967545 contain the supplementary crystallographic data for this paper. These data can be obtained free of charge from The Cambridge Crystallographic Data Centre via: <https://summary.ccdc.cam.ac.uk/structure-summary-form>. Note that the nitrogen atom(s) is crystallographically indistinguishable from the carbon atom(s) and was/were only refined for visual clarity.

**Powder Diffraction.** The powder diffractograms were recorded with the sample in a 0.5 mm thick capillary (Hilgenberg GmbH, wall thickness 0.01 mm) sealed with perfluoropolyalkylether oil (AB128330, ABCR GmbH & Co. KG), at RT and about 100(10) K in the  $2-\Theta$  range  $2-44^\circ$  with a STOE STADI P powder diffractometer with Mo- $K_{\alpha 1}$  radiation ( $\lambda = 0.709300 \text{ \AA}$ ) equipped with a Ge-(111) monochromator and a silicon microstripe detector (Mythen 1K). Data acquiring, processing and the calculation of powder diffractograms from single-crystal data were performed using STOE WinXPOW<sup>®</sup> package. Graphical representations were done with OriginPro (version 9.2).

**Computational Details.** Quantum chemical calculations were performed with the TURBOMOLE<sup>[14]</sup> program package (version 7.0). All investigated molecular structures were optimized at the density functional theory (DFT) and were run in redundant internal coordinates using the BP86<sup>[15]</sup> or B3LYP<sup>[16]</sup> functional with the resolution-of-identity (RI) approximation<sup>[17]</sup> together with the basis set def2-TZVPP<sup>[18]</sup> and with dispersion correction (DFT-D3BJ)<sup>[19]</sup>. A fine integration grid (m4; 5 for NMR calculations) and the default SCF convergence criteria ( $10^{-6}$  a.u.) were used. All optimized structures were checked for minima (no imaginary frequencies) with the implemented module AOFORCE<sup>[20]</sup> and for proper spin occupancies using the implemented module EIGER. Entropic contributions to enthalpy and Gibbs free energy with inclusion of zero point energies (ZPE) were calculated at the BP86-D3BJ/def2-TZVPP level for standard conditions with the FREEH module. For the calculation of the reaction energies in solution, FREEH enthalpy/entropy of the gas phase calculation were used for the COSMO calculations. UV/VIS spectra were calculated based on 50 excited states per orbital symmetry.

## 2. Detailed Synthesis, Characterization and Spectra of Compounds 1 and 2

### Synthesis of $[\text{Fe}(\text{CO})_4(\text{NO})][\text{F}-\{\text{Al}(\text{OR}^{\text{F}})_3\}_2]$ (**1**)

To a double-Schlenk tube equipped with about 1200 mg of impure  $\text{NO}[\text{F}-\{\text{Al}(\text{OR}^{\text{F}})_3\}_2]$ , first  $\text{CH}_2\text{Cl}_2$  (4 mL) then  $\text{Fe}(\text{CO})_5$  (0.35 mL) were added at 0 °C. A beige-grey suspension was formed and gas evolution was visible. After thawing to room temperature (r.t.) and stirring for two hours, some *o*DFB (about 3 mL) was added to dissolve the forming precipitate and accelerate the reaction. Then, the reaction was stirred at RT for another hour and *n*-pentane was added to the brown solution to precipitate the crude product. After subsequent washings, a beige-brown solid was obtained, which was dissolved in *o*DFB (resulting in a brown solution) and crystallized at r.t. by slow vapour diffusion of *n*-pentane, yielding brown crystals of pure **1** (see Supplementary Figure 20). Yield: 650 mg, 49% (referenced to the impure  $\text{NO}^+$ -salt).

**Note:** This route displays the robustness of the synthesis against impurities of the starting materials, their stoichiometry and the solvent. The reaction also works similarly without the excess of  $\text{Fe}(\text{CO})_5$ , the homologues  $\text{Fe}_2(\text{CO})_9$  and  $\text{Fe}_3(\text{CO})_{12}$  can also be used.

**Note:** **1** crystallizes in  $P2_1/c$  from  $\text{CH}_2\text{Cl}_2$  and in  $P-1$  from *o*DFB (see “Single-Crystal XRD Data of Compounds **1** and **2**”).

Simple mixing of the two starting materials, adding a solvent of choice (bearing in mind that  $\text{NO}[\text{WCA}]$  salts are incompatible with *n*-pentane), stirring overnight to ensure a complete transformation, washing of the crude product with  $\text{CH}_2\text{Cl}_2$  or *n*-pentane (to remove possible neutral iron carbonyl impurities) and subsequent crystallization by slow vapour diffusion of *n*-pentane into an *o*DFB or TFB solution led to crystalline **1** in yields around 80%.

**FTIR** (ZnSe, ATR):  $\tilde{\nu}/\text{cm}^{-1}$  (intensity) = 2183 (vww), 2144 (vw), 2137 (mw), 2119 (m), 2083 (vww), 1904 (m), 1353 (vw), 1301 (mw), 1277 (ms), 1268 (ms), 1243 (vvs), 1209 (vvs), 972 (vvs), 860 (vw), 760 (vww), 751 (vww), 726 (vvs), 634 (vw), 605 (m), 592 (w), 568 (w).

**FT Raman** (100 scans, 250 mW, 4  $\text{cm}^{-1}$ ):  $\tilde{\nu}/\text{cm}^{-1}$  (intensity) = 2183 (vvs), 2145 (vvs), 2121 (vvs), 1905 (w), 1269 (vw), 814 (w), 754 (ms), 606 (vw), 572 (vw), 539 (vw), 499 (vww), 365 (mw), 325 (mw), 292 (vw), 233 (vww), 117 (vvs).

**$^1\text{H}$  NMR** (300.18 MHz, *o*DFB, 298 K): *only solvent signals*;  **$^{13}\text{C}\{^1\text{H}\}$  NMR** (75.48 MHz, *o*DFB, 298 K):  $\delta/\text{ppm}$  = 191.8 (s, 4C  $[\text{Fe}(\text{CO})_4(\text{NO})]^+$ ), 121.0 (q,  $^1J(\text{C},\text{F}) = 291$  Hz, 12C,  $[\text{F}-\{\text{Al}(\text{OC}(\text{CF}_3)_3)_3\}_2^-]$ ), 78.8 (m, 4C,  $[\text{F}-\{\text{Al}(\text{OC}(\text{CF}_3)_3)_3\}_2^-]$ );  **$^{14}\text{N}$  NMR** (21.69 MHz, *o*DFB,

298 K):  $\delta/\text{ppm} = 56$  (br. s, 1N,  $[\text{Fe}(\text{CO})_4(\text{NO})]^+$ ),  $-71$  (s,  $\text{N}_2$  from glovebox atmosphere);  $^{19}\text{F}$  NMR (282.45 MHz, *o*DFB, 298 K):  $\delta/\text{ppm} = -76.0$  (s, 54F,  $6 \times \text{C}(\text{CF}_3)_3$ ),  $-185.0$  (br. s, 1F,  $[\text{F}-\{\text{Al}(\text{OC}(\text{CF}_3)_3)_3\}_2]^-$ );  $^{27}\text{Al}$  NMR (78.22 MHz, *o*DFB, 298 K):  $\delta/\text{ppm} = 35$  (br. s, 1Al,  $[\text{F}-\{\text{Al}(\text{OC}(\text{CF}_3)_3)_3\}_2]^-$ ).

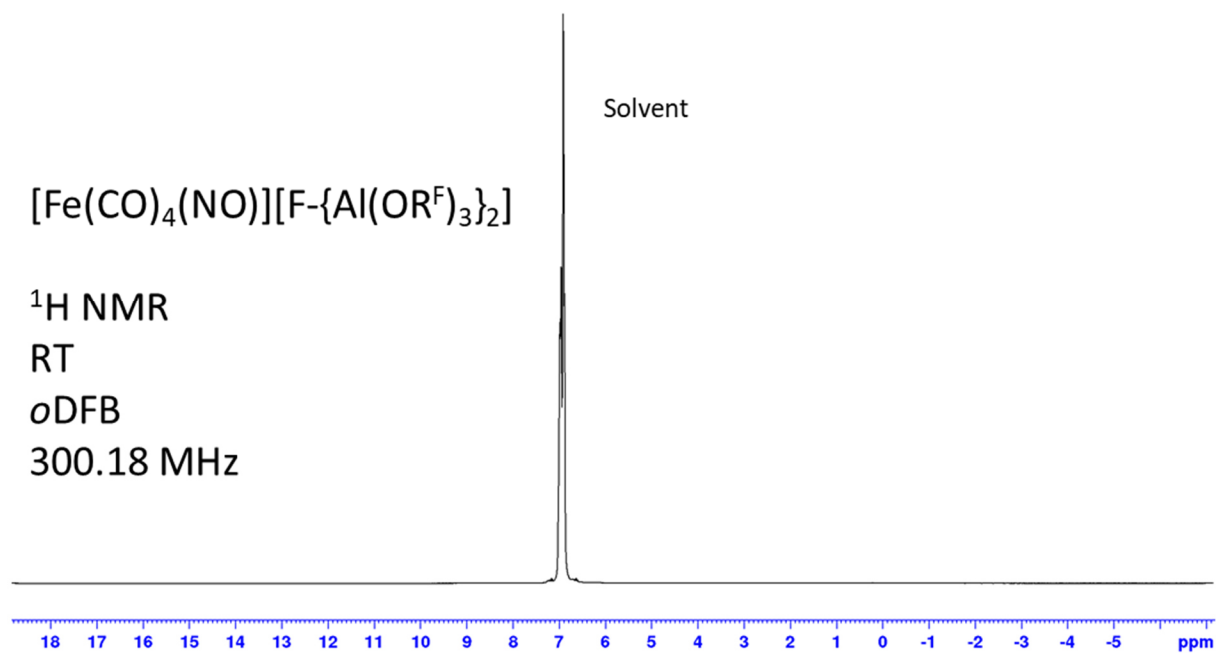

Supplementary Figure 1.  $^1\text{H}$  NMR (300.18 MHz, *o*DFB, RT) of **1**.

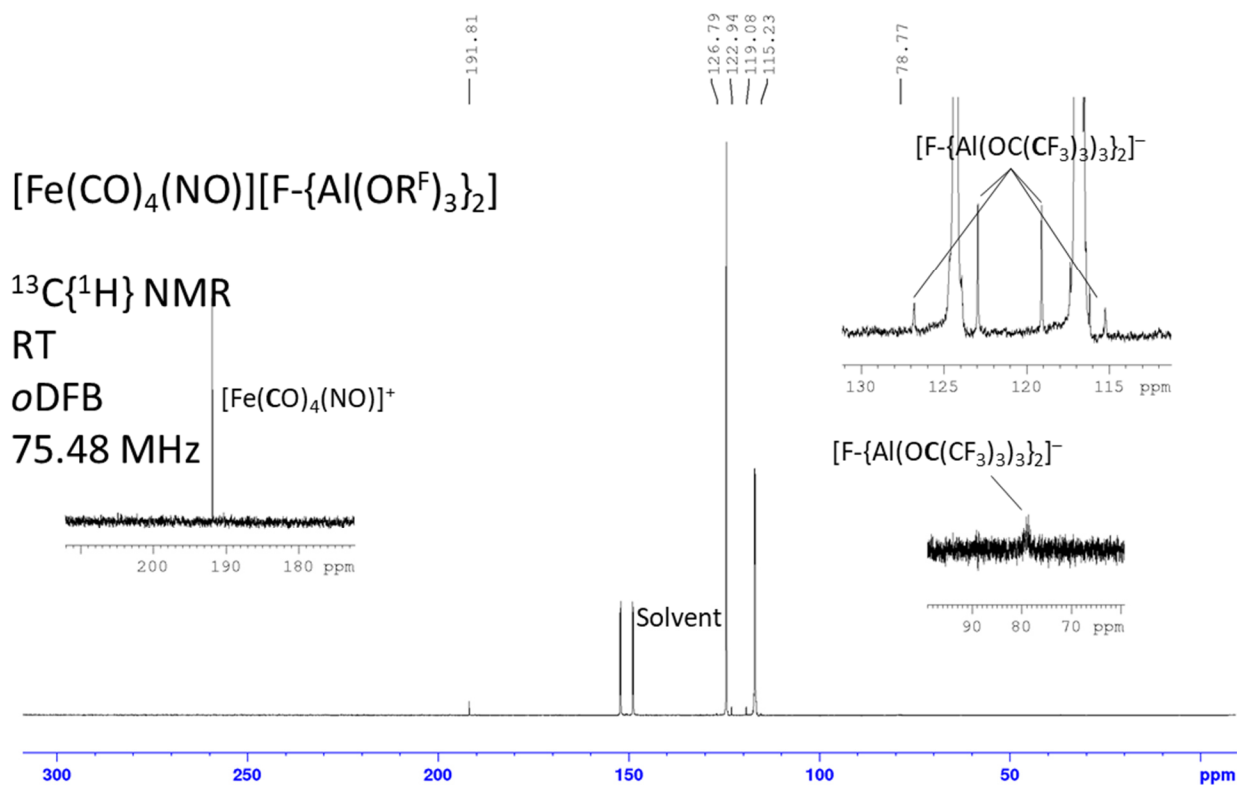

Supplementary Figure 2.  $^{13}\text{C}\{^1\text{H}\}$  NMR (75.78 MHz, *o*DFB, RT) of **1**.

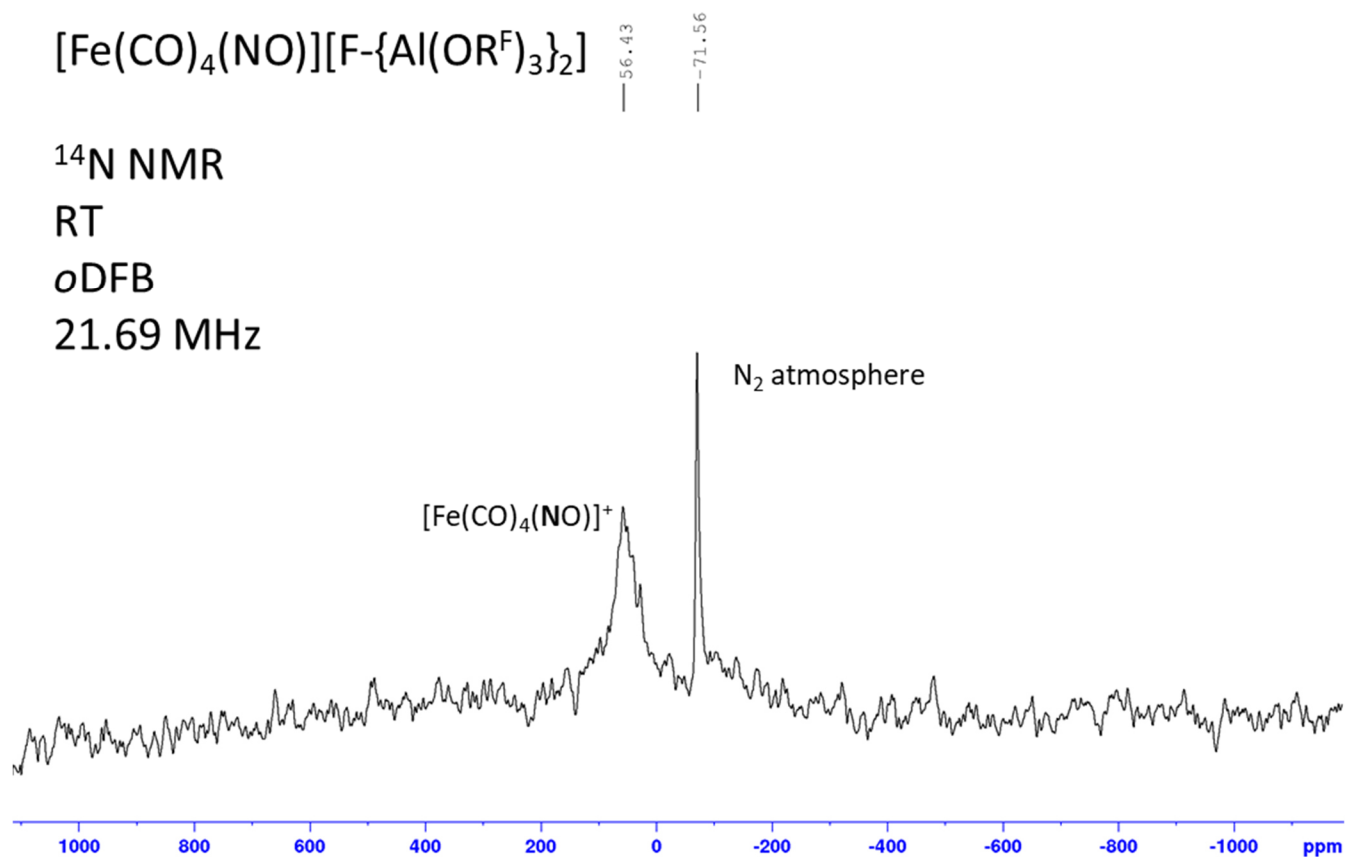

Supplementary Figure 3.  $^{14}\text{N}$  NMR (21.69 MHz, oDFB, RT) of 1.

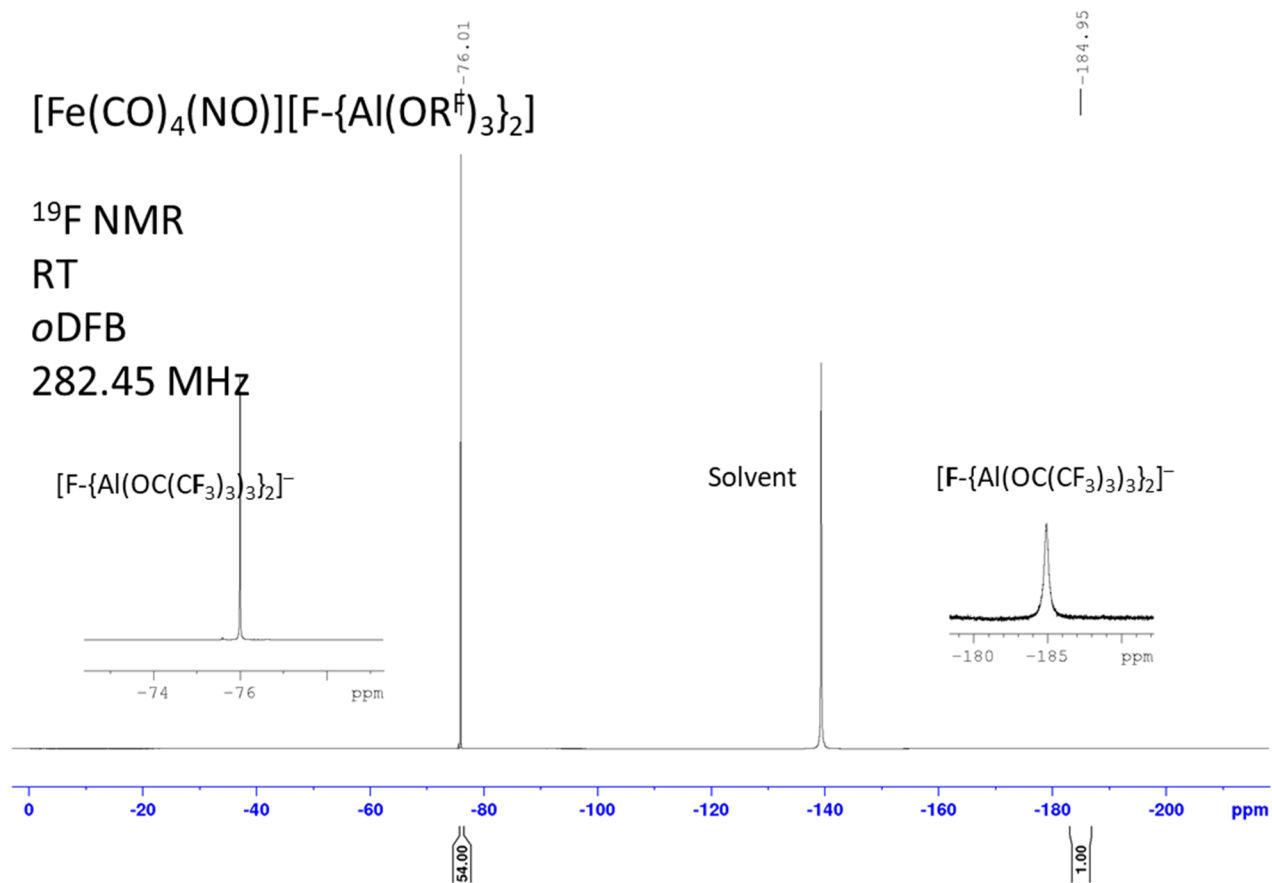

Supplementary Figure 4.  $^{19}\text{F}$  NMR (282.45 MHz, oDFB, RT) of 1.

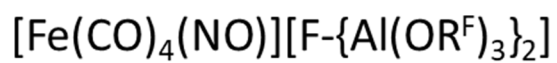

$^{27}\text{Al}$  NMR

RT

*o*DFB

78.22 MHz

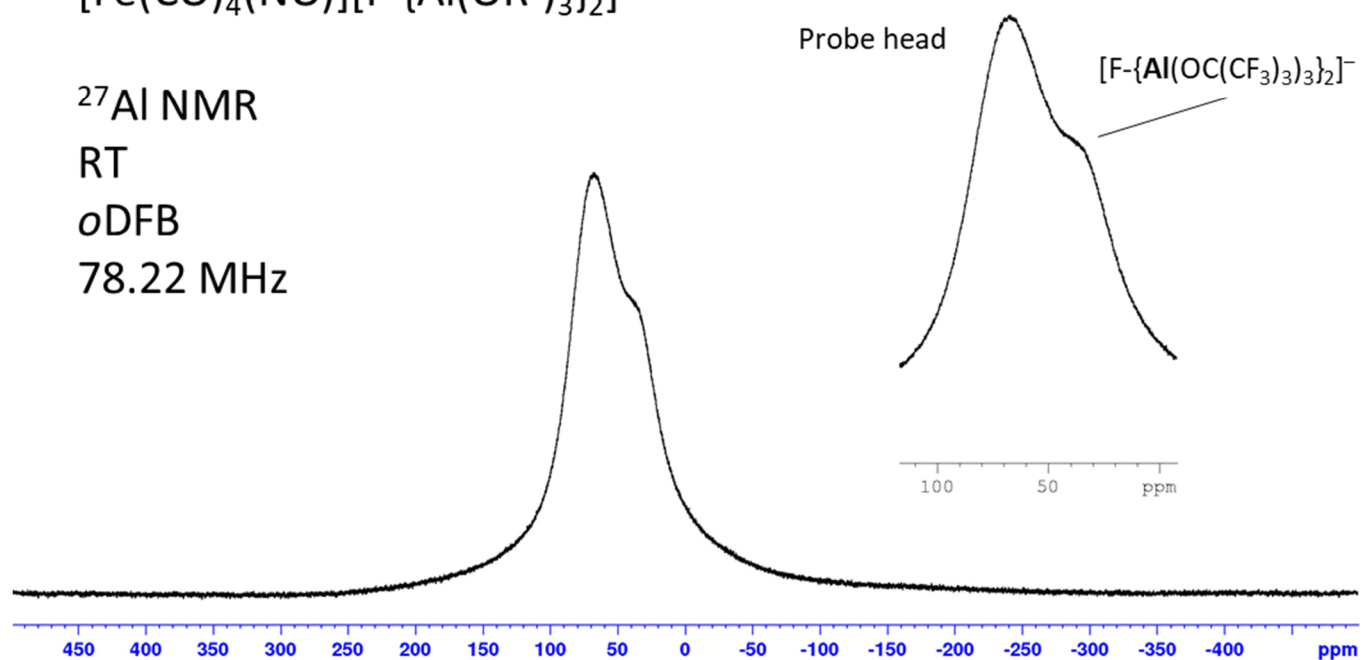

Supplementary Figure 5.  $^{27}\text{Al}$  NMR (78.22 MHz, *o*DFB, RT) of 1.



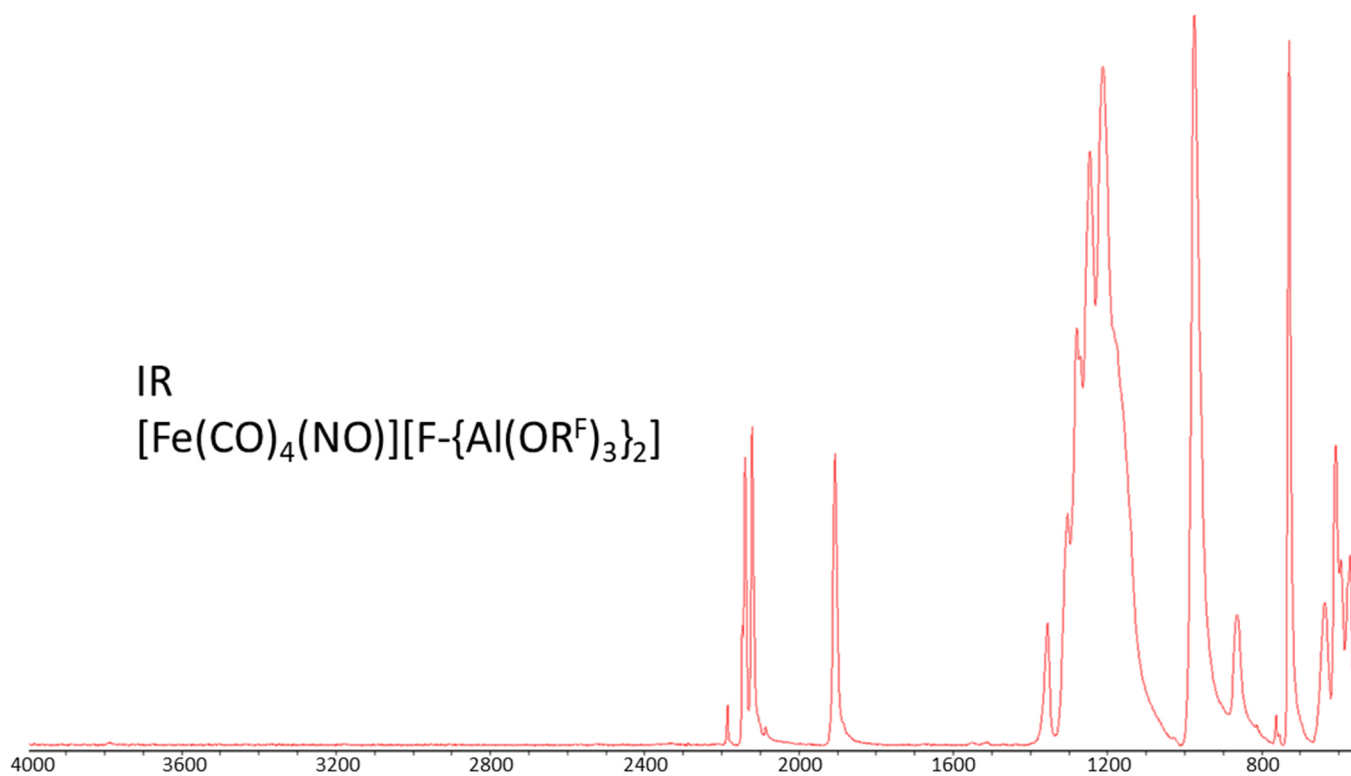

Supplementary Figure 6. Experimental ATR-IR (ZnSe) spectrum of 1.

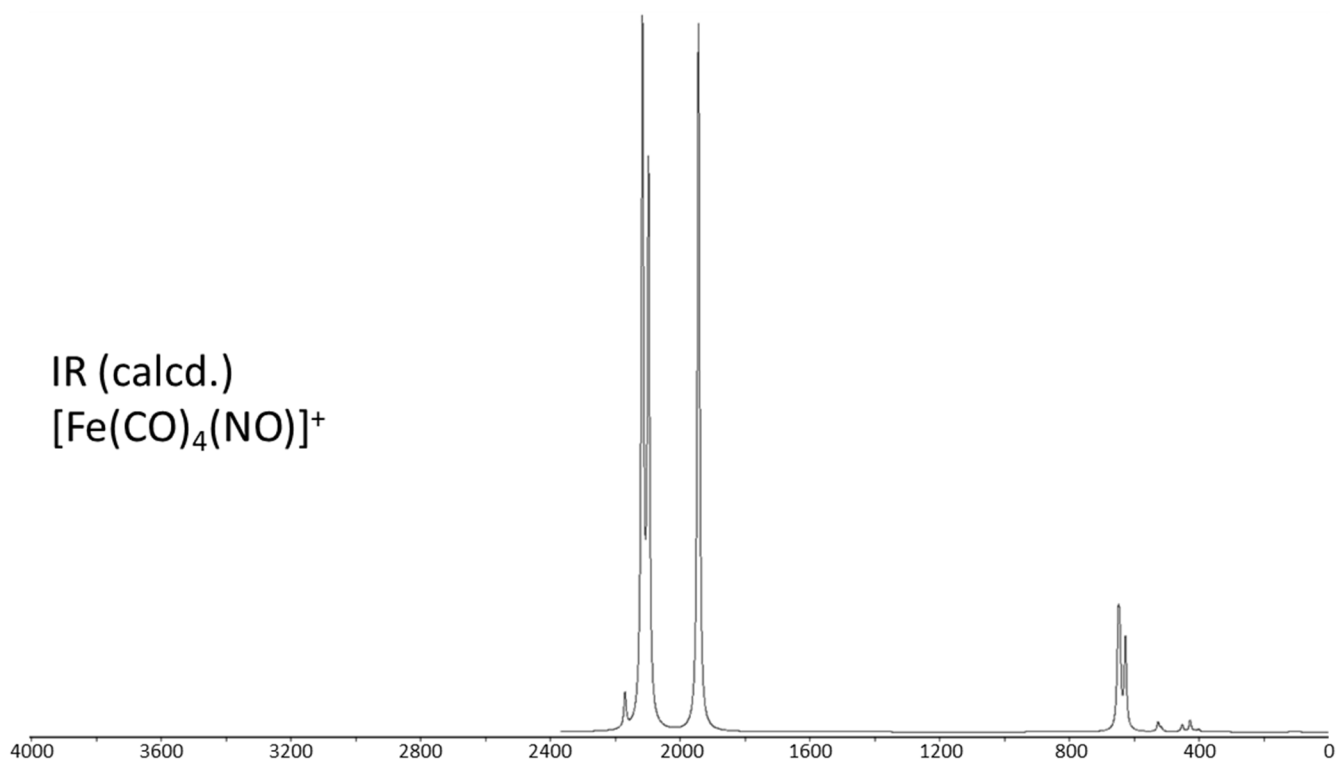

Supplementary Figure 7. Calculated (BP86-D3BJ/def2-TZVPP) IR spectrum of [Fe(CO)<sub>4</sub>(NO)]<sup>+</sup>.

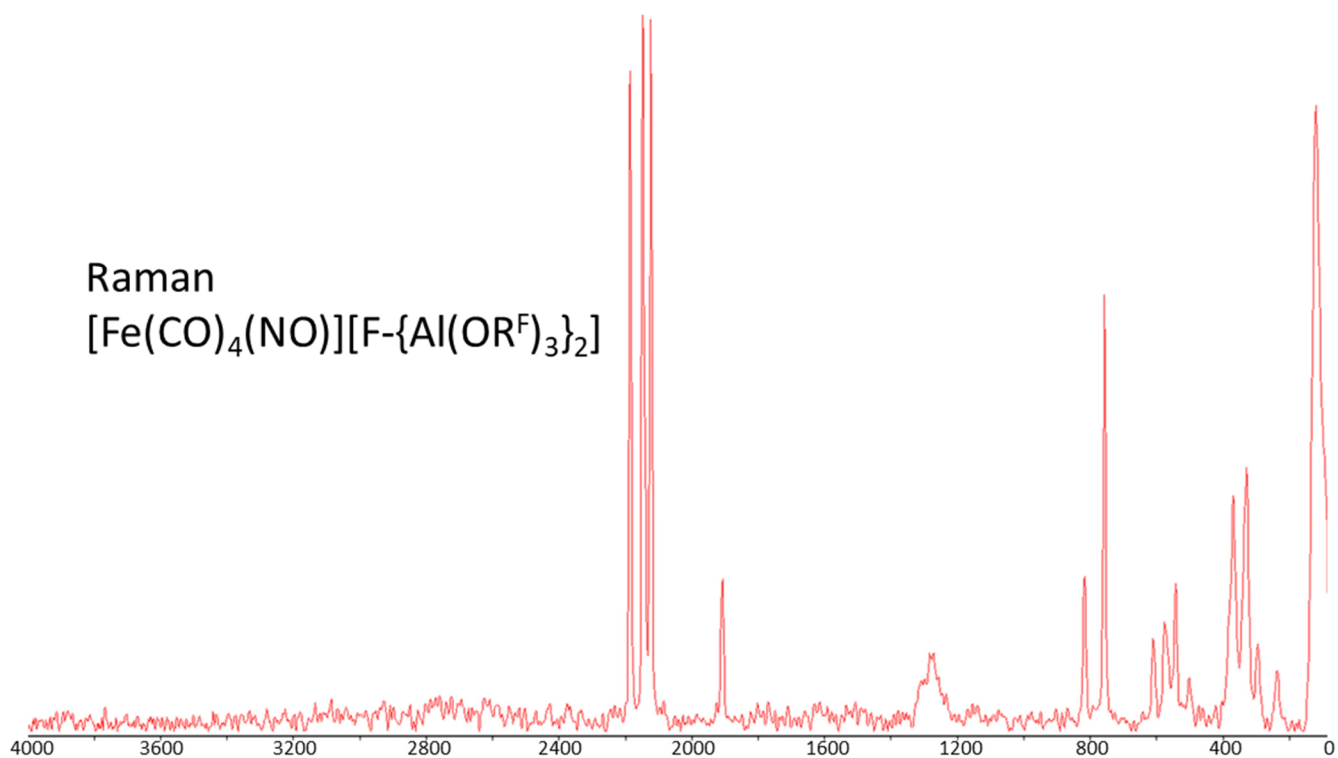

Supplementary Figure 8. Experimental Raman spectrum (100 scans, 250 mW) of **1**.

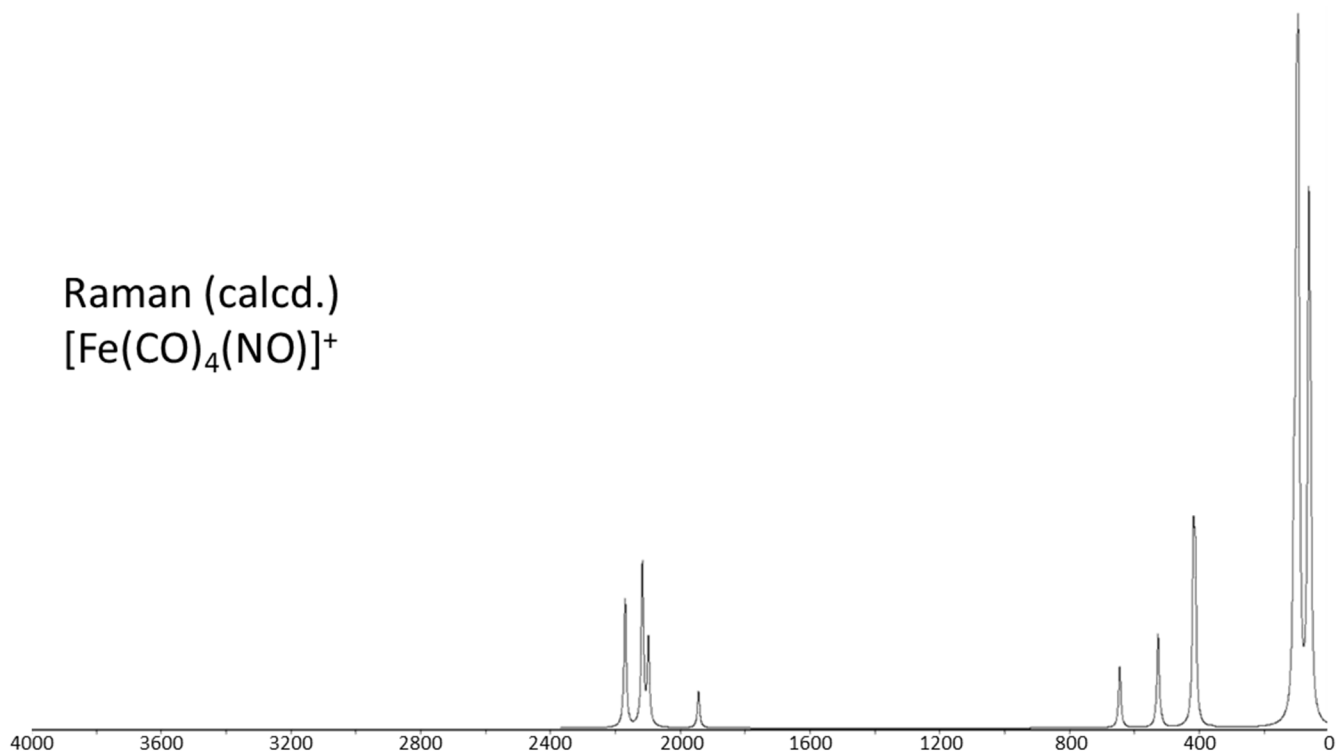

Supplementary Figure 9. Calculated (BP86-D3BJ/def2-TZVPP) Raman spectrum of  $[\text{Fe}(\text{CO})_4(\text{NO})]^+$ .

## Synthesis of $[\text{Fe}(\text{CO})(\text{NO})_3][\text{F}-\{\text{Al}(\text{OR}^{\text{F}})_3\}_2]$ (**2**)

Inside the glovebox,  $\text{Fe}_3(\text{CO})_{12}$  (44.4 mg, 0.088 mmol) and  $\text{NO}[\text{F}-\{\text{Al}(\text{OR}^{\text{F}})_3\}_2]$  (400 mg, 0.264 mmol) were added to a double-Schlenk tube. Then, TFB (ca. 4 mL) was added and gas evolution and formation of brown **1** were visible upon contact of the solvent and the solids. The brown solution was immediately frozen ( $\text{N}_2$ ) and the whole system was evacuated. The flask was filled with  $\text{NO}_{(\text{g})}$  (ca. 1.3 bar) and was allowed to reach r.t. After 5 min of stirring, the solution turned dark green. Additional stirring for three hours ensured a complete conversion. Then, the atmosphere was exchanged with Ar and the crude dark green reaction solution was crystallized by slow vapour diffusion of *n*-pentane at r.t., resulting in dark green crystals (see Supplementary Figure 20). Yield: 352 mg, 80%.

**FTIR** (ZnSe, ATR):  $\tilde{\nu}/\text{cm}^{-1}$  (intensity) = 2189 (vw), 1971 (vw), 1876 (s), 1354 (vw), 1301 (vww), 1266 (vww), 1244 (w), 1213 (vvs), 1176 (vw), 972 (vvs), 862 (vw), 638 (vw), 810 (vww), 760 (vww), 727 (vvs), 628 (w), 567 (w).

**FT Raman** (1000 scans, 250 mW,  $4 \text{ cm}^{-1}$ ):  $\tilde{\nu}/\text{cm}^{-1}$  (intensity) = 2190 (s), 1972 (vw), 1881 (vw), 1308 (vww), 1272 (vww), 1134 (vww), 977 (vww), 817 (vw), 753 (m), 683 (vww), 629 (vww), 569 (w), 540 (vw), 490 (w), 367 (vw), 326 (mw), 291 (vw), 233 (vww), 90 (vvs).

**$^1\text{H}$  NMR** (300.18 MHz, *o*DFB, 298 K): *only solvent signals*;  **$^{13}\text{C}$  NMR** (75.48 MHz, *o*DFB, 298 K):  $\delta/\text{ppm}$  = 184.1 (s, 1C  $[\text{Fe}(\text{CO})(\text{NO})_3]^+$ ), 119.6 (q,  $^1J(\text{C},\text{F}) = 291 \text{ Hz}$ , 12C,  $[\text{F}-\{\text{Al}(\text{OC}(\text{CF}_3)_3)_3\}_2]^-$ ), 77.3 (m, 4C,  $[\text{F}-\{\text{Al}(\text{OC}(\text{CF}_3)_3)_3\}_2]^-$ );  **$^{14}\text{N}$  NMR** (21.69 MHz, *o*DFB, 298 K):  $\delta/\text{ppm}$  = 73 (br. s, 3N,  $[\text{Fe}(\text{CO})(\text{NO})_3]^+$ ), -72 (s,  $\text{N}_2$  from glovebox atmosphere);  **$^{19}\text{F}$  NMR** (282.45 MHz, *o*DFB, 298 K):  $\delta/\text{ppm}$  = -75.5 (s, 54F,  $6 \times \text{C}(\text{CF}_3)_3$ ), -184.4 (br. s, 1F,  $[\text{F}-\{\text{Al}(\text{OC}(\text{CF}_3)_3)_3\}_2]^-$ );  **$^{27}\text{Al}$  NMR** (78.22 MHz, *o*DFB, 298 K):  $\delta/\text{ppm}$  = 34 (br. s, 1Al,  $[\text{F}-\{\text{Al}(\text{OC}(\text{CF}_3)_3)_3\}_2]^-$ ).

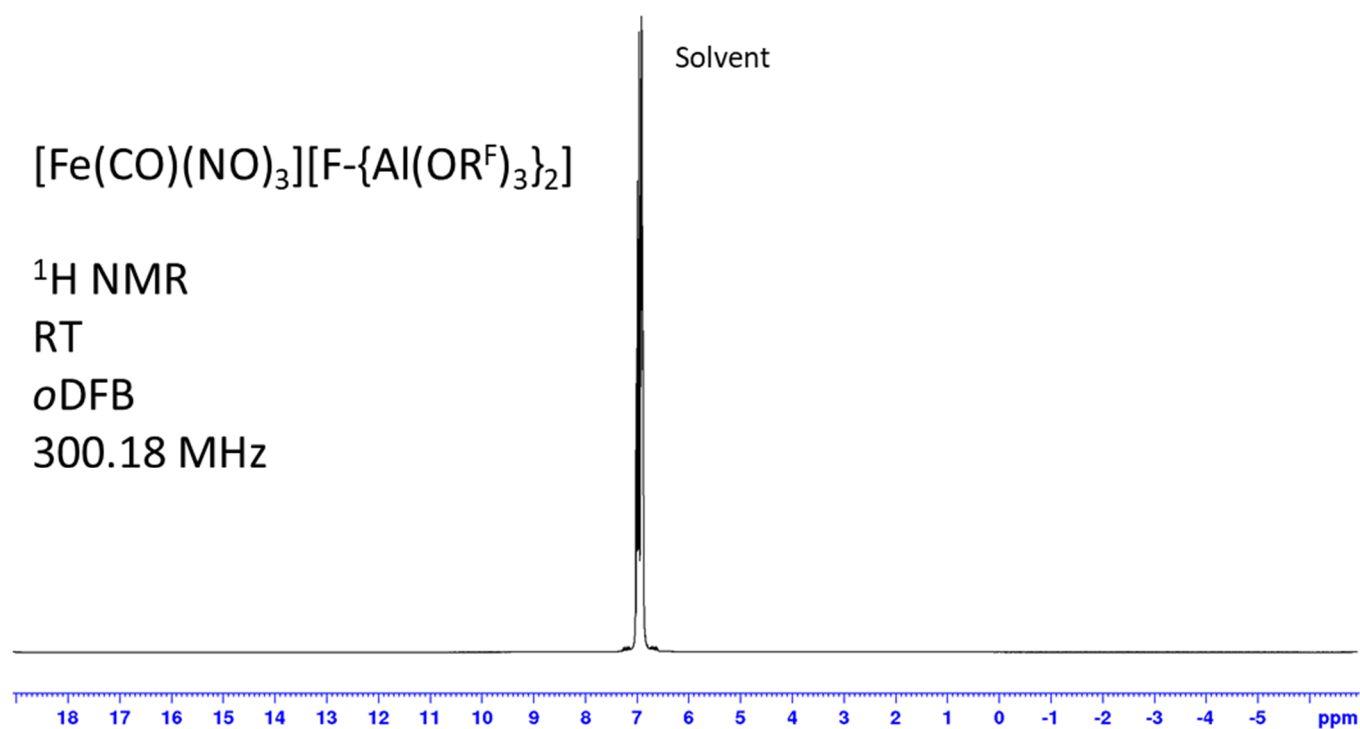

Supplementary Figure 10.  $^1\text{H}$  NMR (300.18 MHz, oDFB, RT) of 2.

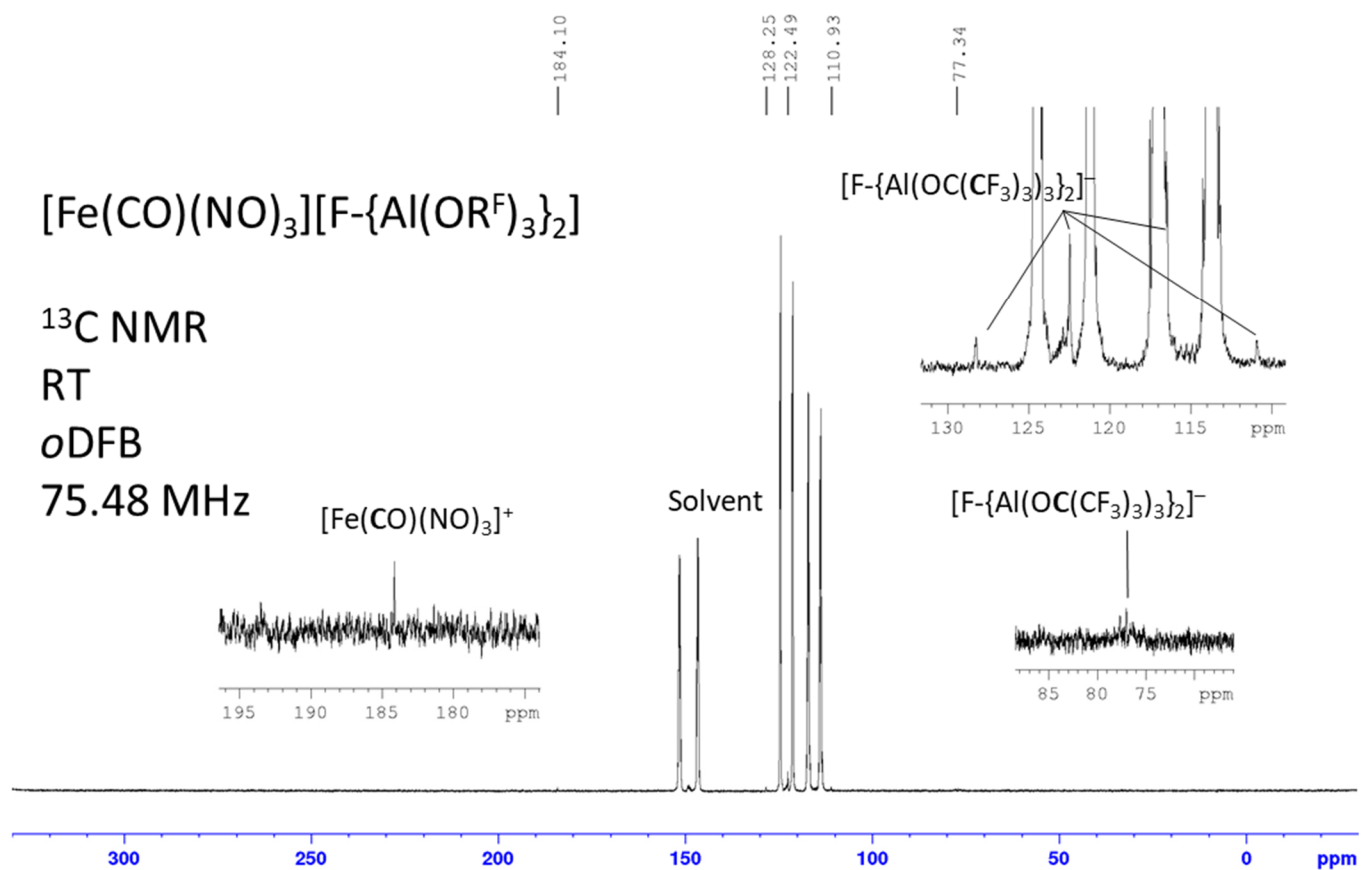

Supplementary Figure 11.  $^{13}\text{C}$  NMR (75.48 MHz, oDFB, RT) of 2.

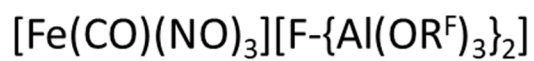

$^{14}\text{N}$  NMR

RT

*o*DFB

21.69 MHz

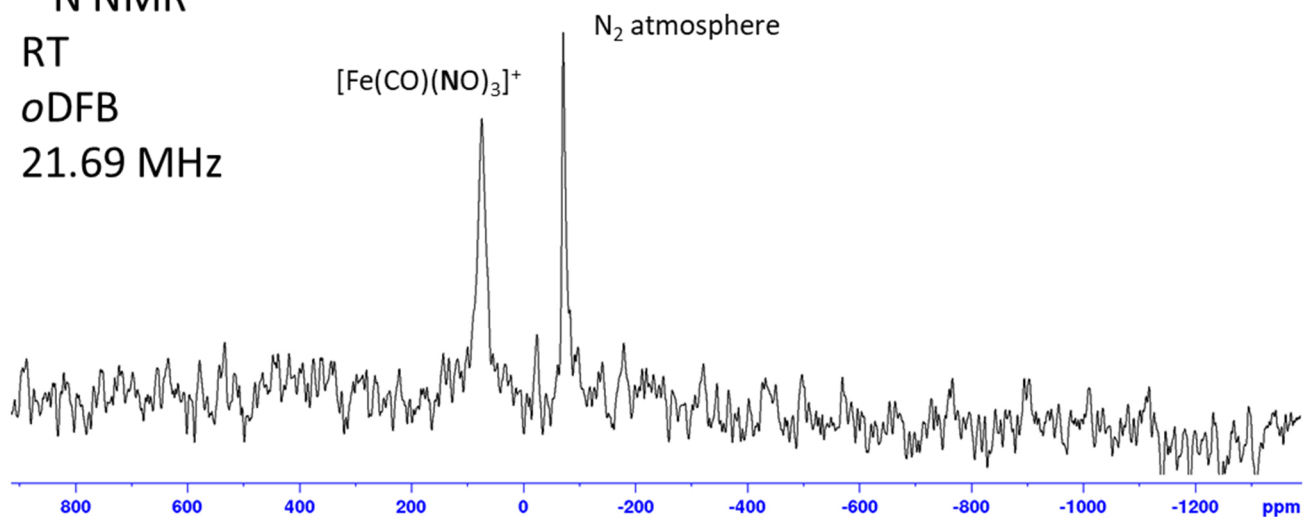

Supplementary Figure 12.  $^{14}\text{N}$  NMR (21.69 MHz, *o*DFB, RT) of 2.

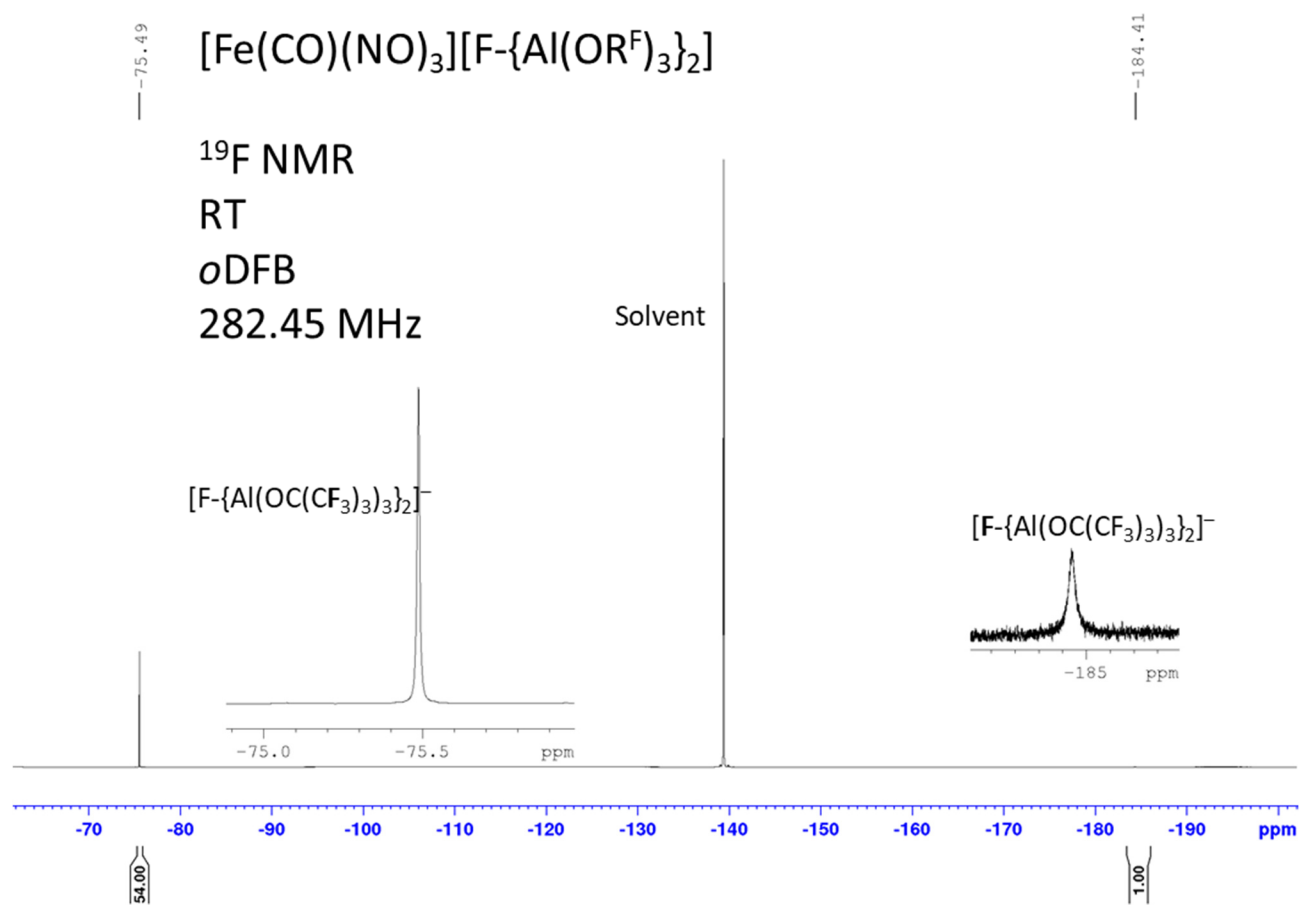

Supplementary Figure 13.  $^{19}\text{F}$  NMR (282.45 MHz, *o*DFB, RT) of 2.

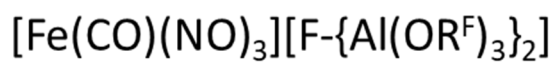

$^{27}\text{Al}$  NMR

RT

*o*DFB

78.22 MHz

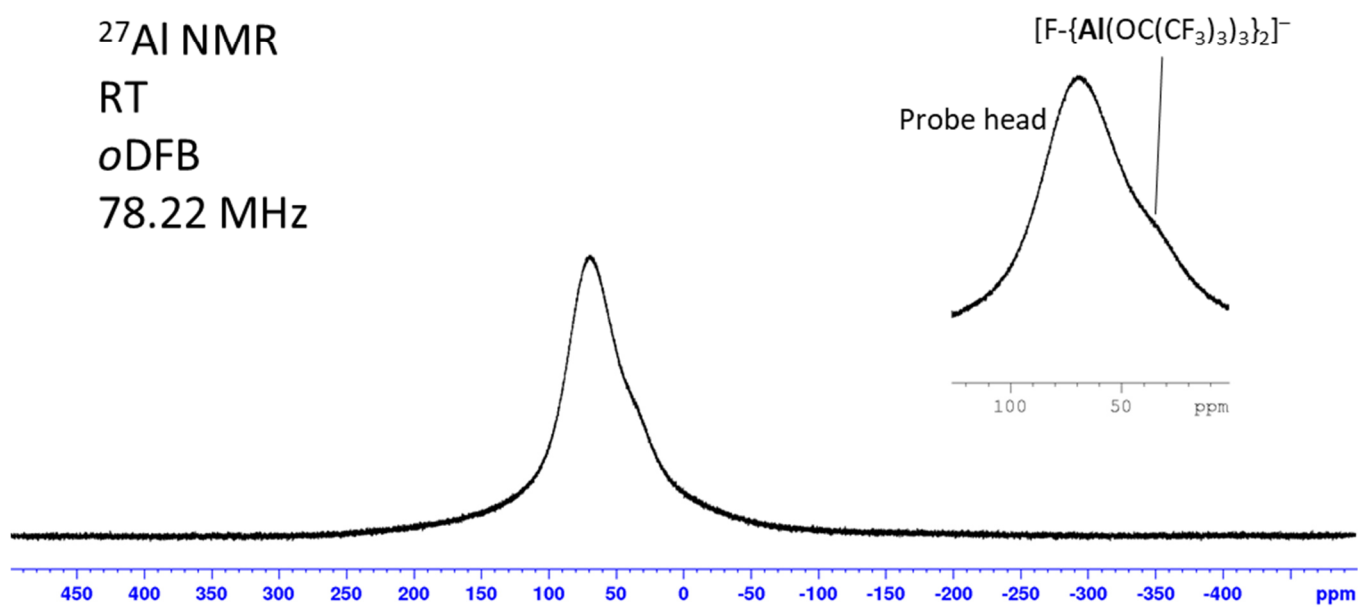

Supplementary Figure 14.  $^{27}\text{Al}$  NMR (78.22 MHz, *o*DFB, RT) of **2**.

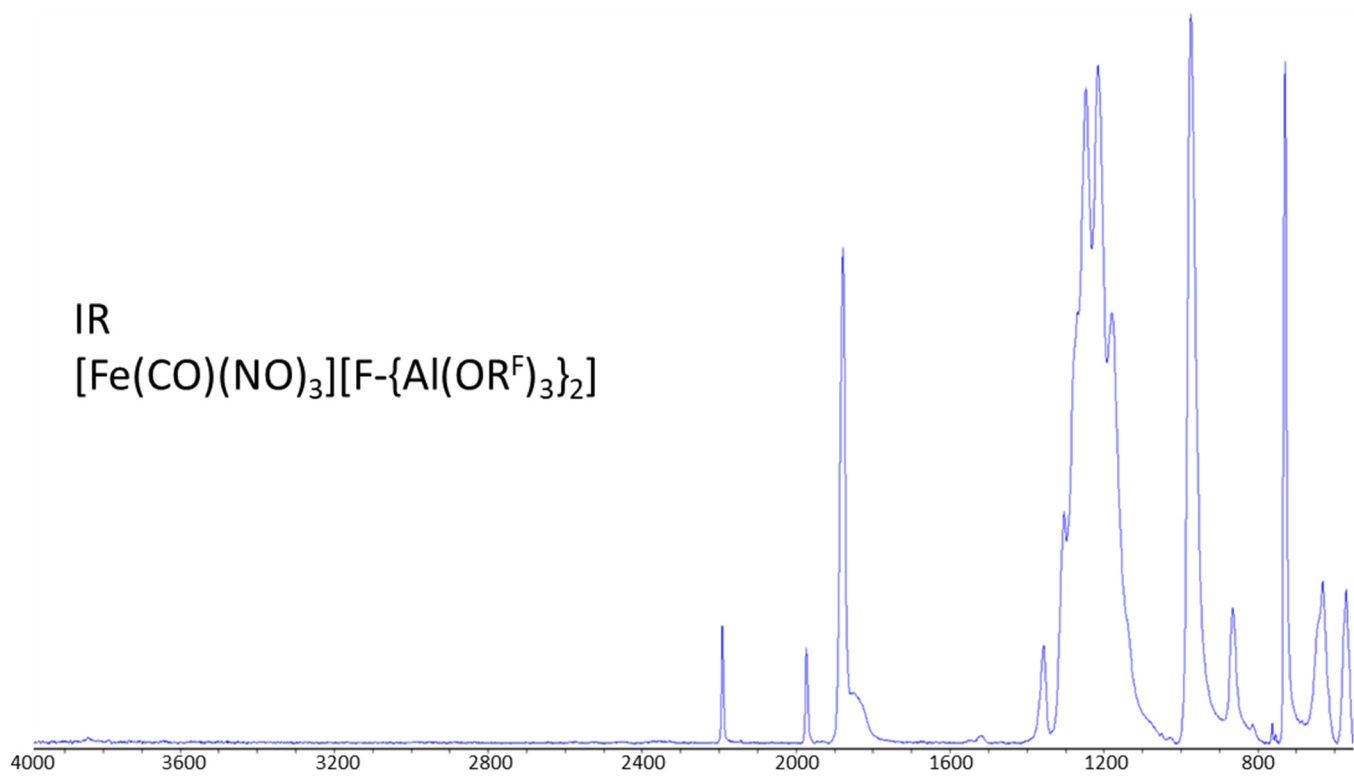

Supplementary Figure 15. Experimental ATR-IR (ZnSe) spectrum of 2.

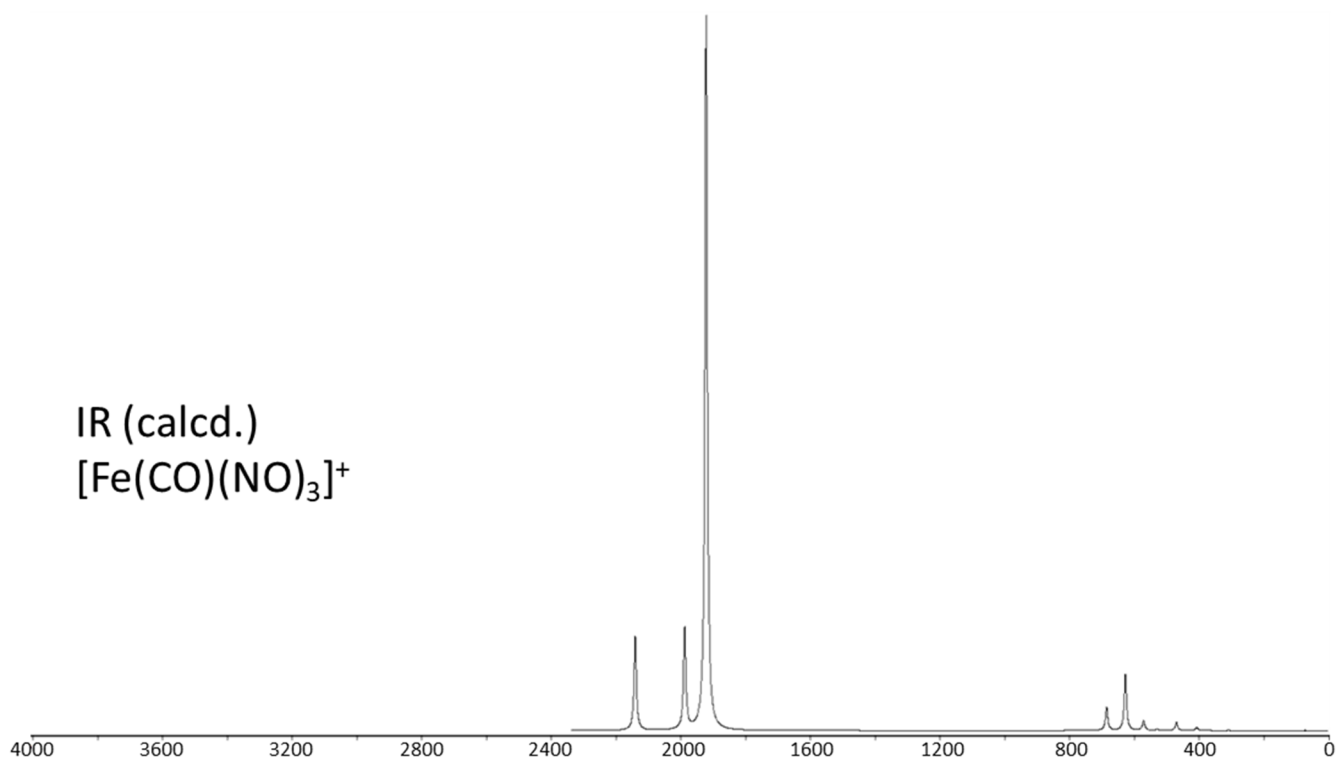

Supplementary Figure 16. Calculated (BP86-D3BJ/def2-TZVPP) IR spectrum of [Fe(CO)(NO)<sub>3</sub>]<sup>+</sup>.

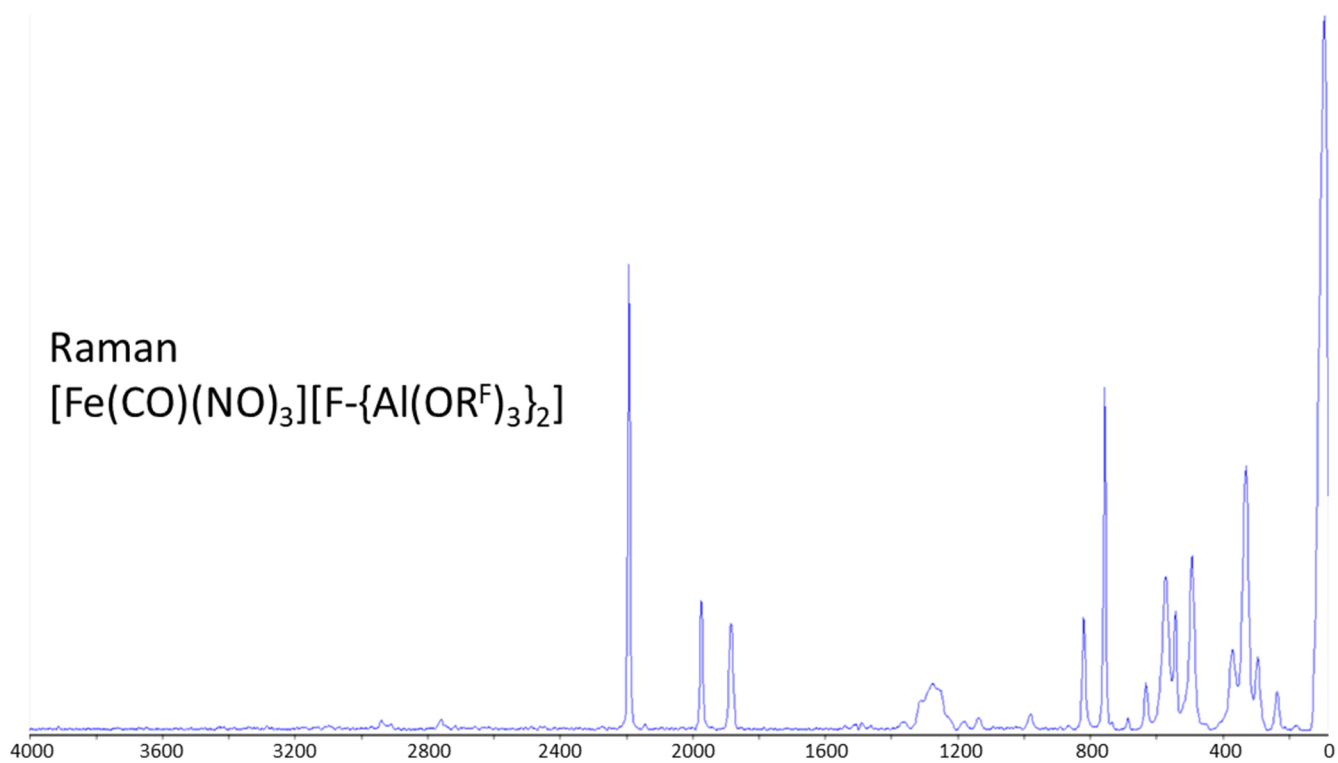

Supplementary Figure 17. Experimental Raman spectrum (1000 scans, 250 mW) of **2**.

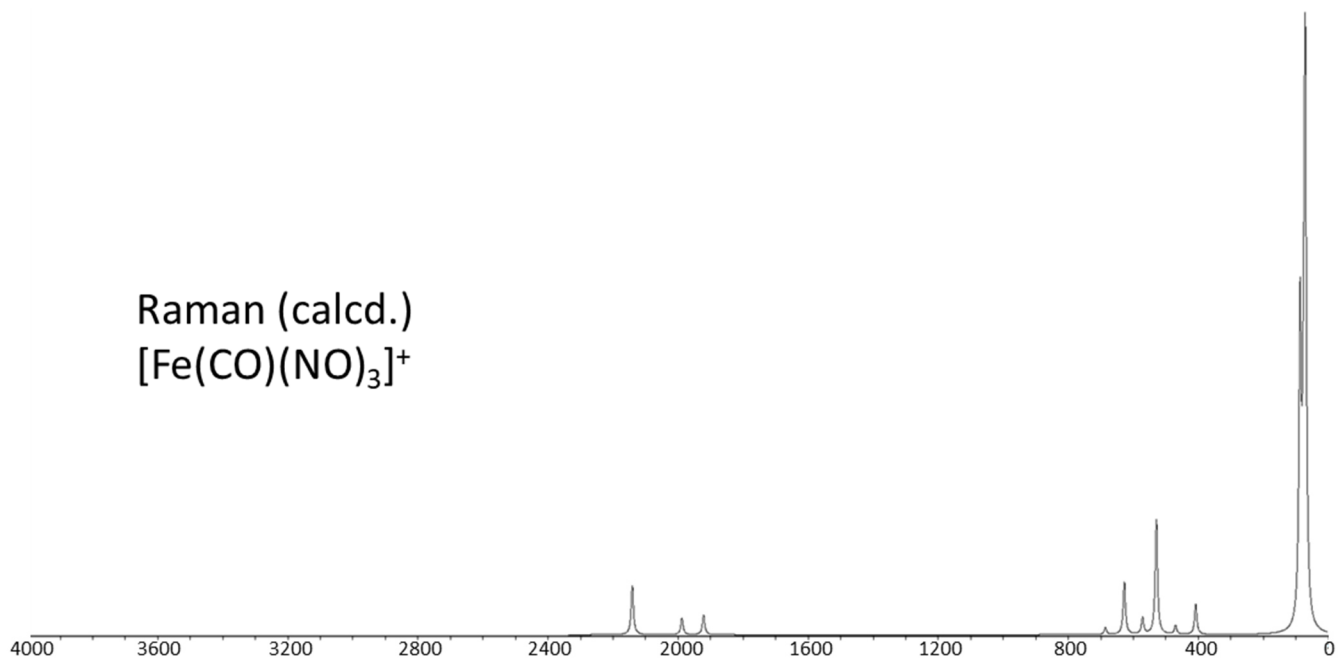

Supplementary Figure 18. Calculated (BP86-D3BJ/def2-TZVPP) Raman spectrum of  $[\text{Fe}(\text{CO})(\text{NO})_3]^+$ .



### 3. Glassware used and Pictures of compounds 1 and 2

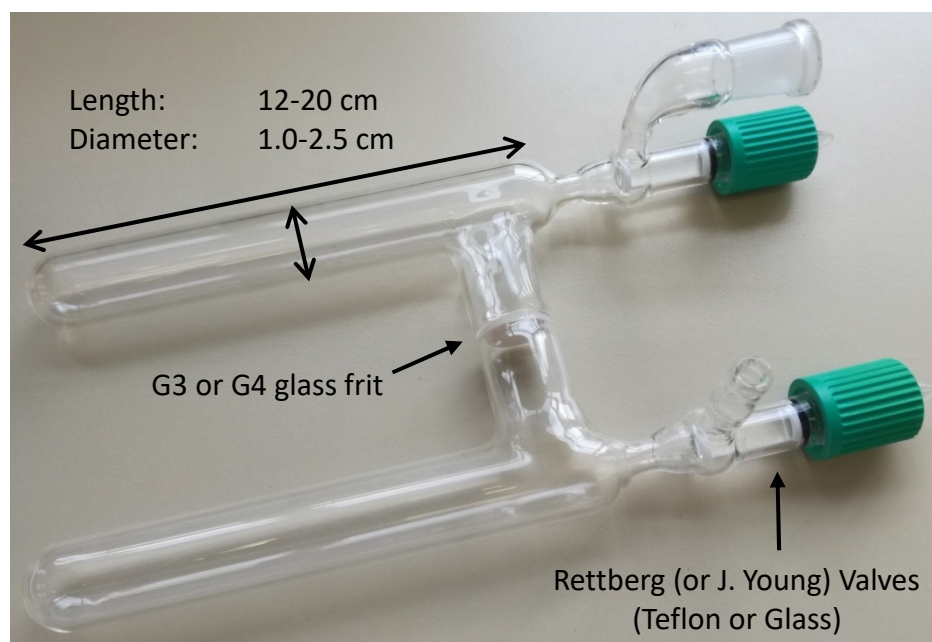

*Supplementary Figure 19.* Double-Schlenk tube that was typically used for most reactions and crystallizations. Note that different varieties (sizes, Rettberg or J. Young valves) were used. Picture taken by Jan Bohnenberger.

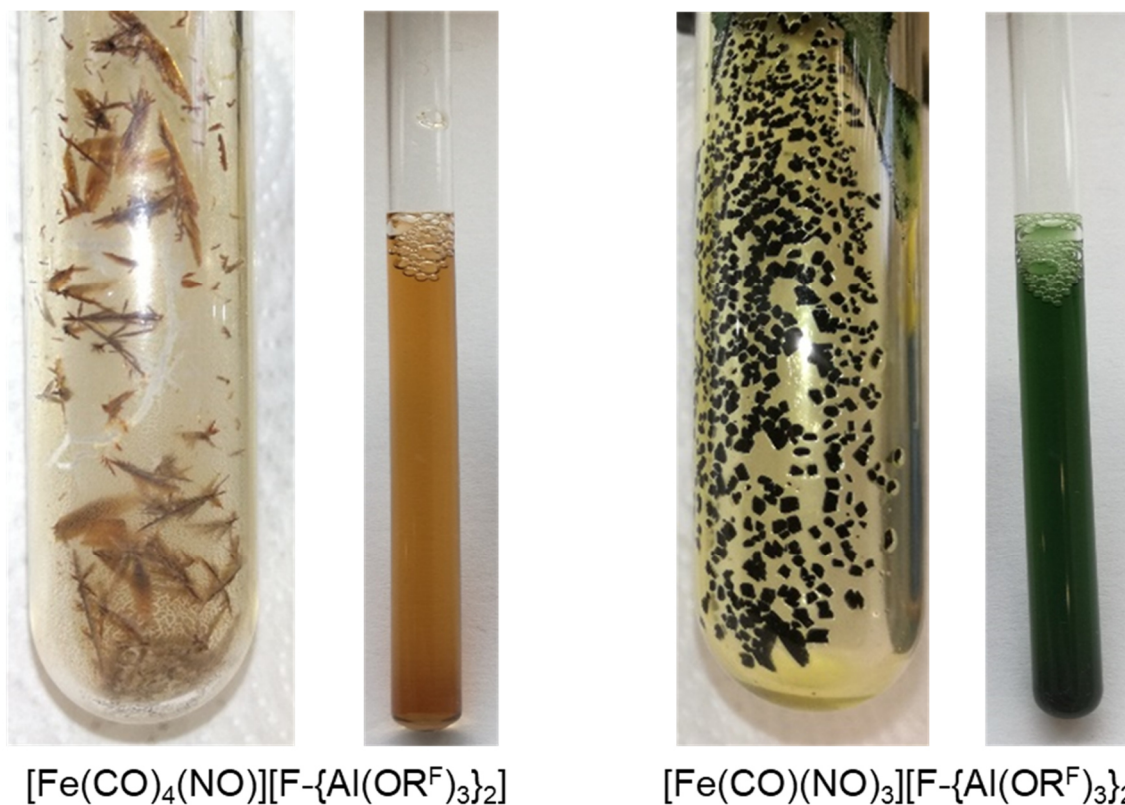

*Supplementary Figure 20.* Brown crystals and brown oDFB solution of 1 (left) and green crystals and green oDFB solution of 2. Pictures taken by Jan Bohnenberger.

## 4. Vibrational Analysis

Supplementary Table 1. Full assignment of all IR and Raman vibrations for complexes 1 and 2.

| [Fe(CO) <sub>4</sub> (NO)]<br>[F- $\{Al(OR^F)_3\}_2$ ] (1) |            | [Fe(CO) <sub>4</sub> (NO)] <sup>+</sup> calcd. <sup>a)</sup> |                      | [Fe(CO)(NO) <sub>3</sub> ]<br>[F- $\{Al(OR^F)_3\}_2$ ] (2) |            | [Fe(CO)(NO) <sub>3</sub> ] <sup>+</sup> calcd. <sup>b)</sup> |                     | [F- $\{Al(OR^F)_3\}_2$ ]<br>[21] | Assignment<br>[21] c)                                                  |
|------------------------------------------------------------|------------|--------------------------------------------------------------|----------------------|------------------------------------------------------------|------------|--------------------------------------------------------------|---------------------|----------------------------------|------------------------------------------------------------------------|
| IR                                                         | Raman      | IR                                                           | Raman                | IR                                                         | Raman      | IR                                                           | Raman               | IR                               |                                                                        |
|                                                            | 117 (vvs)  |                                                              | 59 (vvs)<br>92 (vvs) |                                                            | 90 (vvs)   |                                                              | 68 (vvs)<br>84 (ms) |                                  | $\delta$ (Fe-N) B <sub>1</sub> /E<br>$\delta$ (Fe-C) B <sub>2</sub> /E |
|                                                            | 233 (vvw)  |                                                              |                      |                                                            | 233 (vvw)  |                                                              |                     |                                  | C-C                                                                    |
|                                                            | 292 (vw)   |                                                              |                      |                                                            | 291 (vw)   |                                                              |                     |                                  | C-C, Al-O                                                              |
|                                                            | 325 (mw)   |                                                              |                      |                                                            | 326 (mw)   |                                                              |                     |                                  | C-C, Al-O                                                              |
|                                                            | 365 (mw)   |                                                              | 410 (w)              |                                                            | 367 (vw)   |                                                              | 405 (vvw)           |                                  | *C-C, Al-O<br>$\nu$ (Fe-C) A <sub>1</sub>                              |
|                                                            |            |                                                              | 425 (vvw)            |                                                            |            |                                                              |                     |                                  | $\delta$ (Fe-C) B <sub>2</sub>                                         |
|                                                            |            |                                                              | 449 (vvw)            |                                                            |            |                                                              |                     |                                  | $\nu$ (Fe-C) B <sub>1</sub>                                            |
|                                                            |            |                                                              |                      |                                                            |            | 467 (vvw)                                                    | 467 (vvw)           |                                  | $\delta$ (Fe-C) E                                                      |
|                                                            |            |                                                              |                      |                                                            | 490 (w)    |                                                              | 526 (vw)            |                                  | $\nu$ (Fe-N) A <sub>1</sub>                                            |
|                                                            | 499 (vvw)  | 524 (vvw)                                                    | 524 (vw)             |                                                            |            |                                                              |                     |                                  | $\nu$ (Fe-N) A <sub>1</sub>                                            |
|                                                            | 540 (vw)   |                                                              |                      |                                                            | 540 (vw)   |                                                              |                     |                                  | C-C, C-O                                                               |
| 568 (w)                                                    | 572 (vw)   |                                                              |                      | 567 (w)                                                    | 569 (w)    | 569 (vvw)                                                    | 569 (vvw)           | 572 (m)                          | *Al-O, C-C<br>$\delta$ (Fe-N) E                                        |
| 592 (w)                                                    |            | 625 (vw)                                                     |                      |                                                            |            |                                                              |                     |                                  | $\delta$ (Fe-N) B <sub>1</sub>                                         |
| 605 (m)                                                    | 606 (vw)   | 646 (vw)                                                     | 642 (vww)            |                                                            |            |                                                              |                     |                                  | $\delta$ (Fe-C) B <sub>2</sub><br>$\nu$ (Fe-N) A <sub>1</sub>          |
|                                                            |            |                                                              |                      | 628 (w)                                                    | 629 (vvw)  | 625 (vvw)                                                    | 625 (vvw)           |                                  | $\delta$ (Fe-N) E                                                      |
| 634 (vw)                                                   |            |                                                              |                      | 639 (vw)                                                   |            |                                                              |                     | 639 (m)                          | Al-F-Al                                                                |
|                                                            |            |                                                              |                      |                                                            |            | 683 (vvw)                                                    | 683 (vvw)           | 683 (vvw)                        | $\delta$ (Fe-N) A <sub>1</sub>                                         |
| 726 (vvs)                                                  |            |                                                              |                      | 727 (vvs)                                                  |            |                                                              |                     | 728 (s)                          | C-C, C-O                                                               |
| 751 (vvw)                                                  | 754 (ms)   |                                                              |                      |                                                            | 753 (m)    |                                                              |                     |                                  | [Anion]                                                                |
|                                                            |            |                                                              |                      |                                                            |            |                                                              |                     |                                  | C-C, C-O                                                               |
| 760 (vvw)                                                  |            |                                                              |                      | 760 (vvw)                                                  |            |                                                              |                     |                                  | C-C, C-O                                                               |
|                                                            | 814 (w)    |                                                              |                      | 810 (vvw)                                                  | 817 (vw)   |                                                              |                     |                                  | [Anion]                                                                |
| 860 (vw)                                                   |            |                                                              |                      | 862 (vw)                                                   |            |                                                              |                     | 865 (w)                          | Al-O, Al-F-Al                                                          |
| 972 (vvs)                                                  |            |                                                              |                      | 972 (vvs)                                                  | 977 (vvw)  |                                                              |                     | 975 (s)                          | C-C, C-F                                                               |
|                                                            |            |                                                              |                      |                                                            | 1134 (vww) |                                                              |                     |                                  | C-C, C-F                                                               |
|                                                            |            |                                                              |                      | 1176 (vw)                                                  |            |                                                              |                     | 1183 (m)                         | C-C, C-F                                                               |
| 1209 (vvs)                                                 |            |                                                              |                      | 1213 (vvs)                                                 |            |                                                              |                     | 1218 (s)                         | C-C, C-F                                                               |
| 1243 (vvs)                                                 |            |                                                              |                      | 1244 (w)                                                   |            |                                                              |                     | 1249 (s)                         | C-C, C-F                                                               |
| 1277 (ms)                                                  | 1269 (vw)  |                                                              |                      | 1266 (vvw)                                                 | 1272 (vvw) |                                                              |                     | 1268 (m)                         | C-C, C-F                                                               |
| 1301 (mw)                                                  |            |                                                              |                      | 1301 (vww)                                                 | 1308 (vww) |                                                              |                     | 1301 (m)                         | C-C, C-F                                                               |
| 1353 (vw)                                                  |            |                                                              |                      | 1354 (w)                                                   |            |                                                              |                     | 1355 (m)                         | C-C, C-F                                                               |
|                                                            |            |                                                              |                      | 1876 (s)**                                                 | 1881 (vw)  | 1919 (vvw)                                                   | 1919 (vvw)          |                                  | $\nu$ (N-O) E                                                          |
| 1904 (m)                                                   | 1905 (w)   | 1941 (vvs)                                                   | 1941 (vww)           |                                                            |            |                                                              |                     |                                  | $\nu$ (N-O) A <sub>1</sub>                                             |
|                                                            |            |                                                              |                      | 1971 (vw)                                                  | 1972 (vw)  | 1986 (vw)                                                    | 1986 (vww)          |                                  | $\nu$ (N-O) A <sub>1</sub>                                             |
| 2083 (vww)                                                 |            |                                                              |                      |                                                            |            |                                                              |                     |                                  | $\nu$ ( <sup>13</sup> C-O)                                             |
| 2119 (m)                                                   | 2121 (vvs) | 2096 (vvs)                                                   | 2096 (vw)            |                                                            |            |                                                              |                     |                                  | $\nu$ (C-O) B <sub>2</sub>                                             |
| 2137 (mw)                                                  |            |                                                              |                      |                                                            |            |                                                              |                     |                                  | $\nu$ (C-O) B <sub>1</sub> ***                                         |
| 2144 (vw, sh)                                              | 2145 (vvs) | 2114 (vvs)                                                   | 2114 (w)             |                                                            |            |                                                              |                     |                                  | $\nu$ (C-O) A <sub>1</sub> ***                                         |
| 2183 (vww)                                                 | 2183 (vvs) | 2168 (vww)                                                   | 2169 (w)             |                                                            |            |                                                              |                     |                                  | $\nu$ (C-O) A <sub>1</sub>                                             |
|                                                            |            |                                                              |                      | 2189 (vw)                                                  | 2190 (s)   | 2139 (vw)                                                    | 2139 (vww)          |                                  | $\nu$ (C-O) A <sub>1</sub>                                             |

<sup>a)</sup> BP86-D3BJ/def2-TZVPP, C<sub>2v</sub> symmetry, **no scale factor was applied**. w: weak, m: medium, s: strong, v: very, sh: shoulder, br: broad.

<sup>b)</sup> BP86-D3BJ/def2-TZVPP, C<sub>3v</sub> symmetry, **no scale factor was applied**. w: weak, m: medium, s: strong, v: very, sh: shoulder, br: broad.

<sup>c)</sup> The assignments of the respective anion bands and their intensities are based on [CBr<sub>3</sub>][F- $\{Al(OR^F)_3\}_2$ ] (IR only) in ref.<sup>[21]</sup>.

\* Note: Due to partial overlap with the anion bands, the  $\nu$ (Fe-C) A<sub>1</sub>/E vibrations cannot be assigned unambiguously.

\*\* Sometimes a possible unknown impurity can be seen as a shoulder (see Supplementary Figure 15) although the powder-XRD of the same sample appears to be phase-pure (Supplementary Figure 22).

\*\*\* The assignment of the shoulder is ambiguous.

## 5. Powder XRD Data

In order to evaluate the phase purity of the bulk materials **1** and **2** powder XRD measurements were conducted at 100K. They confirm the absence of crystalline impurities for both bulk materials.

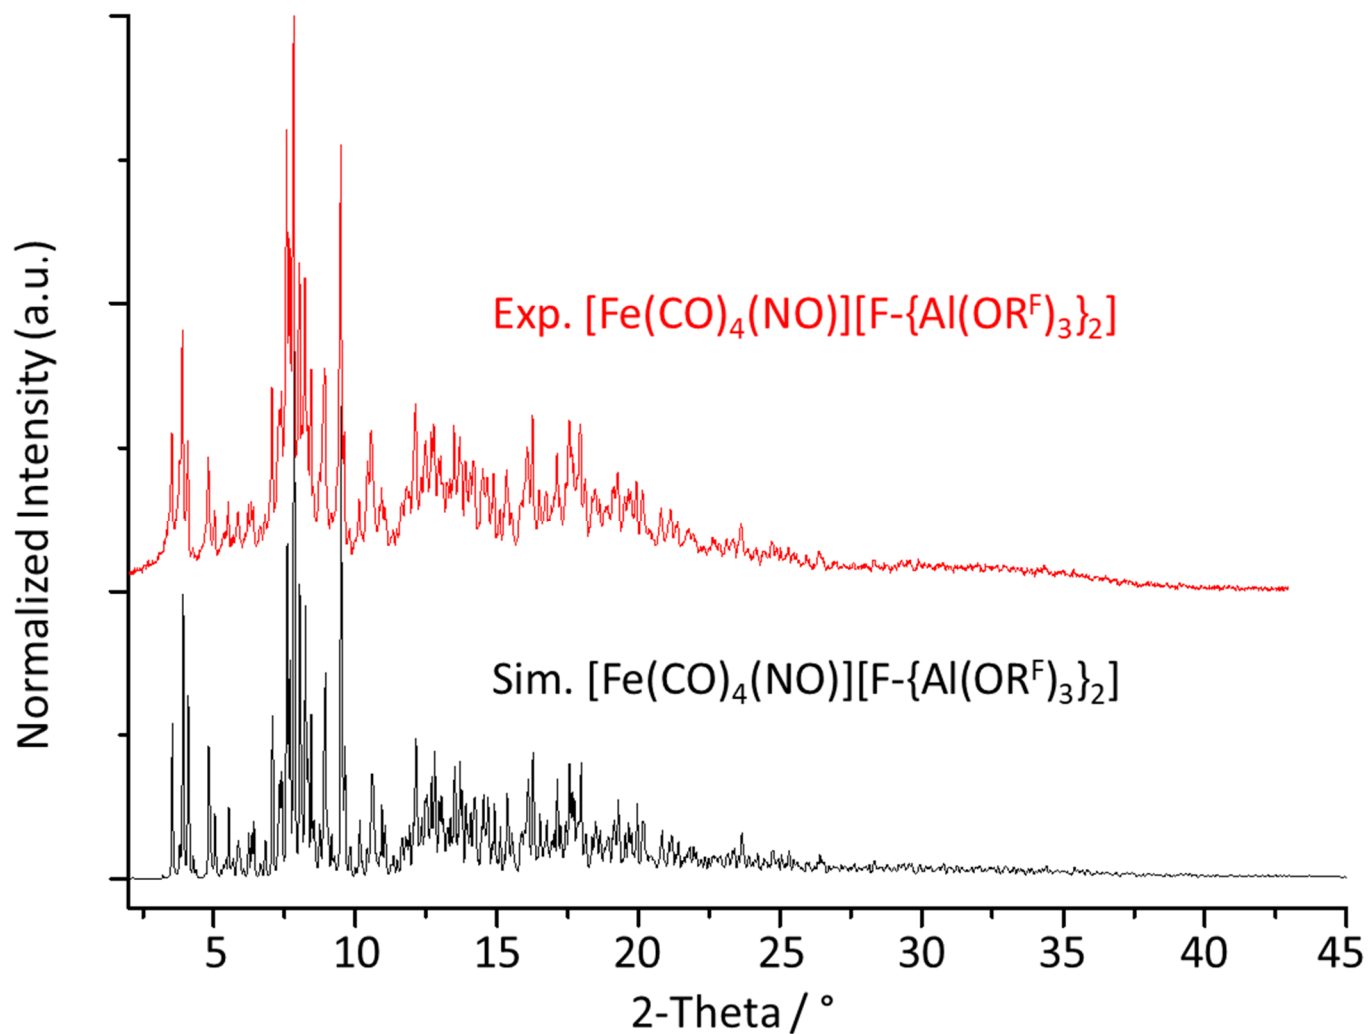

Supplementary Figure 21. Experimental (red) and simulated (black) powder diffractograms of **1**.

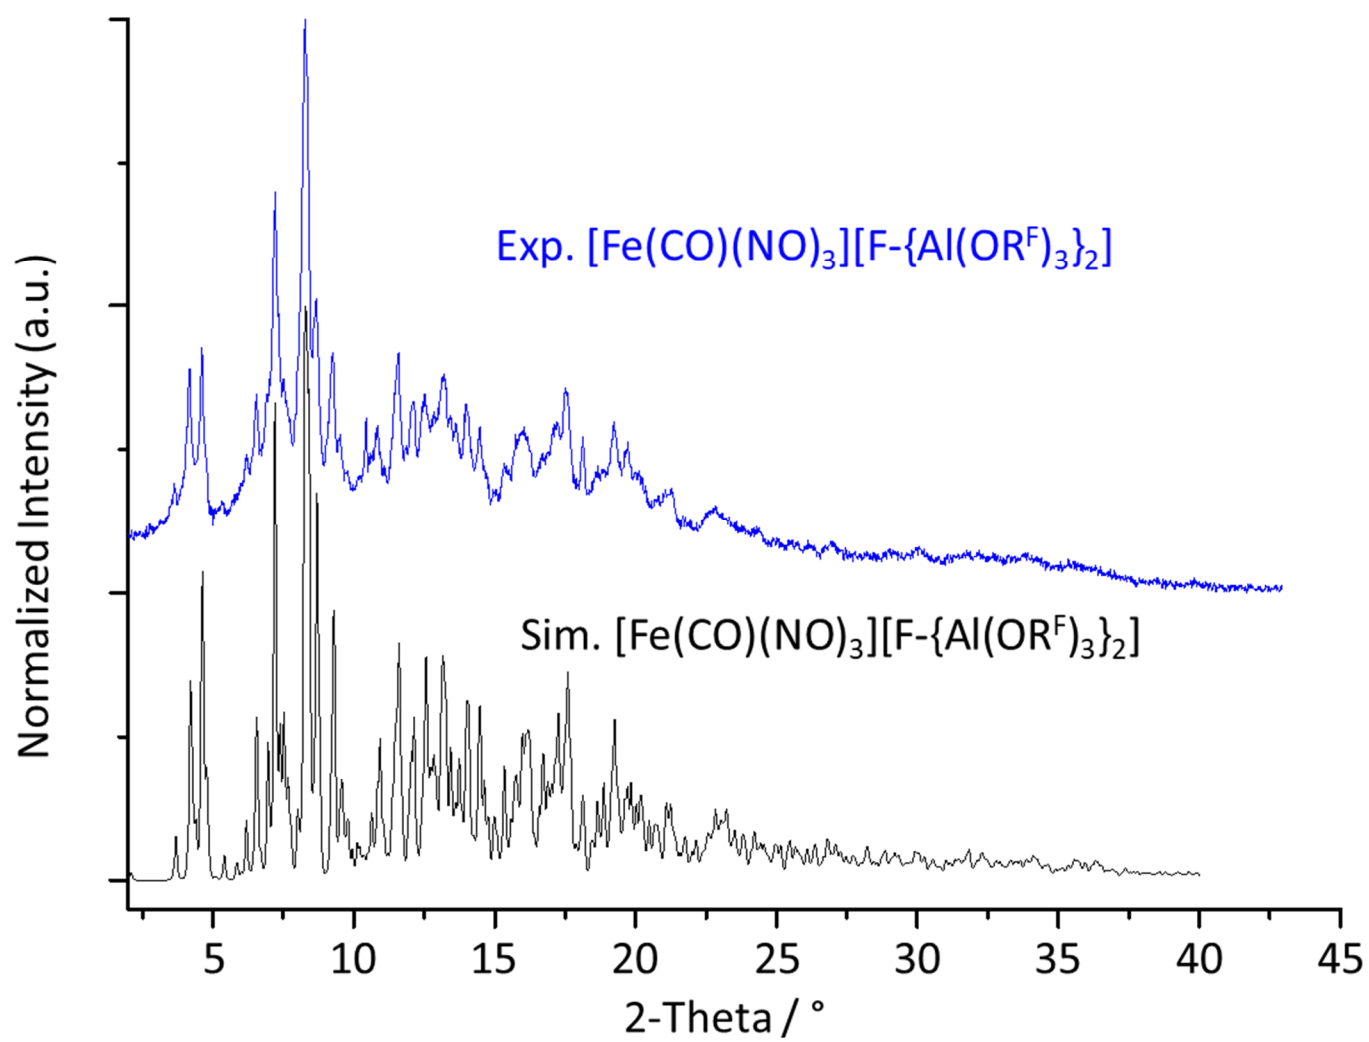

Supplementary Figure 22. Experimental (blue) and simulated (black) powder diffractograms of 2.

## 6. UV/VIS Spectra

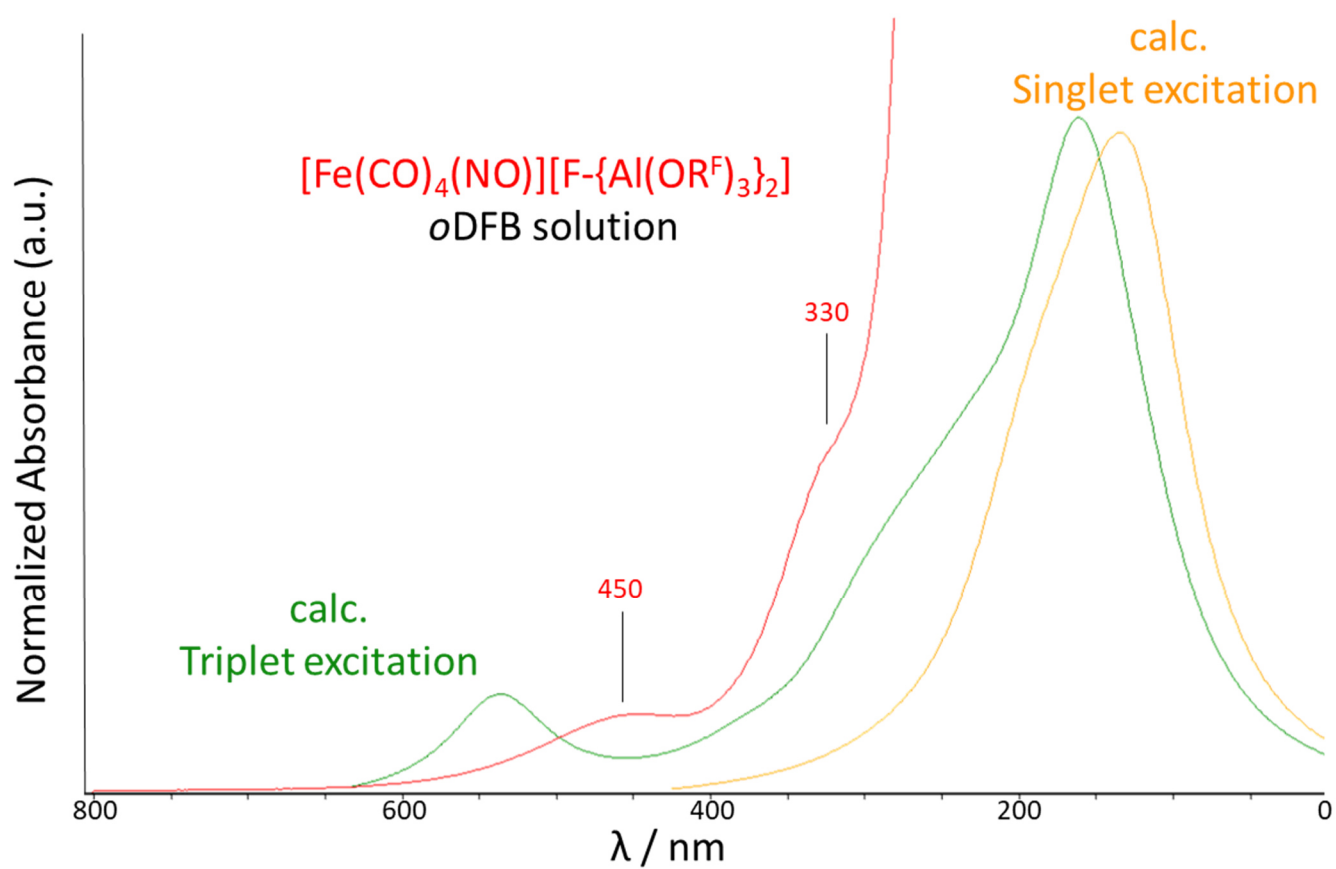

Supplementary Figure 23. Solution (oDFB) UV/VIS absorbance spectrum of **1** (red) with absorption maxima at  $\lambda_{max} = 450 \text{ nm}$ ,  $330 \text{ nm}$  and calculated (BP86-D3BJ/def2-TZVPP,  $C_{2v}$  symmetry, 100 nm line width) UV/VIS spectra of  $[\text{Fe}(\text{CO})_4(\text{NO})]^+$  with triplet (green) and singlet (orange) excitations.

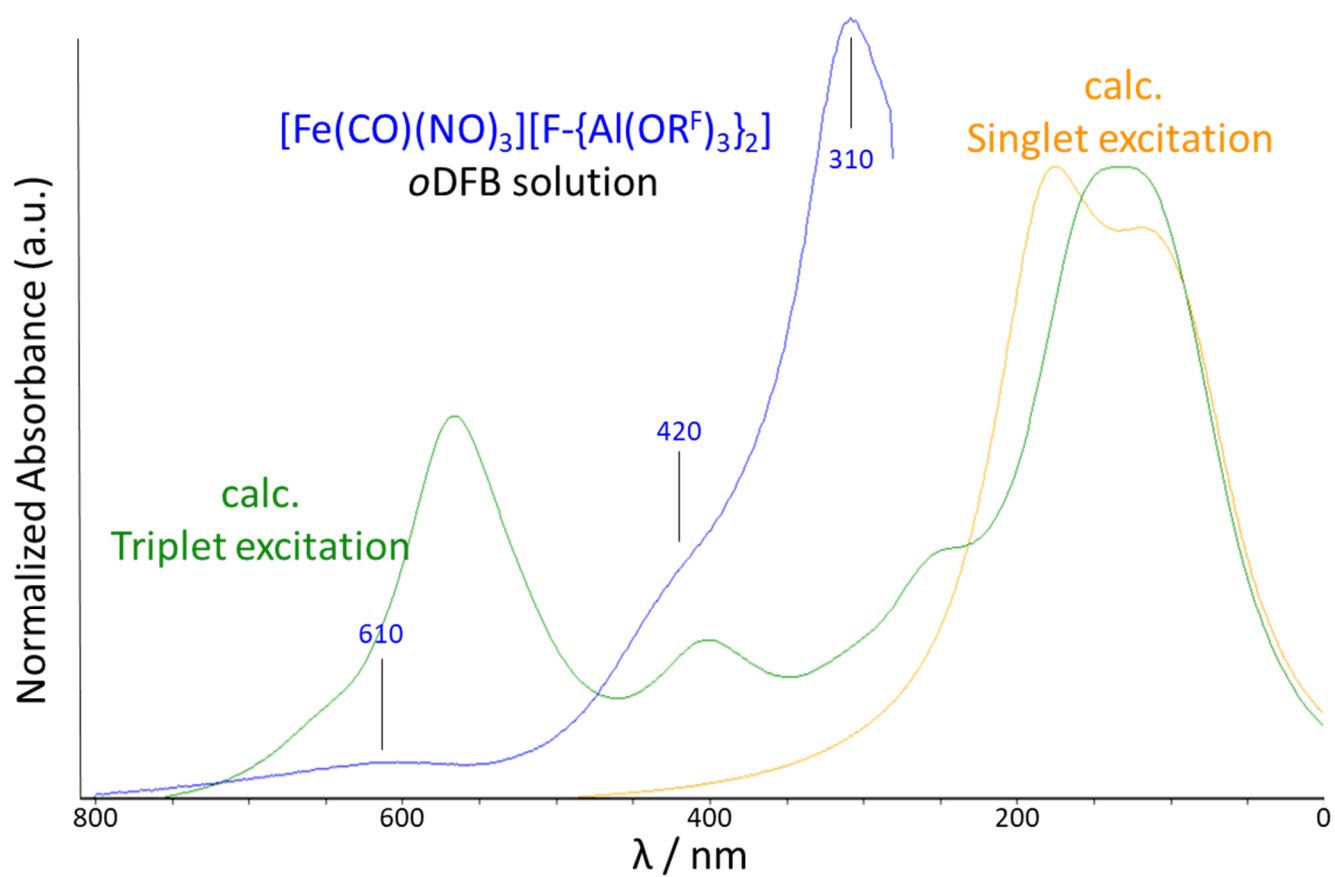

Supplementary Figure 24. Solution (oDFB) UV/VIS absorbance spectrum of **2** (blue) with absorption maxima at  $\lambda_{max} = 610 \text{ nm}$ ,  $420 \text{ nm}$ ,  $310 \text{ nm}$  and calculated (BP86-D3BJ/def2-TZVPP,  $C_{3v}$  symmetry, 100 nm line width) UV/VIS spectra of  $[\text{Fe}(\text{CO})(\text{NO})_3]^+$  with triplet (green) and singlet (orange) excitations.

## 7. Discussion of the Existence of “[Fe(CO)<sub>5</sub>(NO)]Cl”

In order to evaluate the existence of the curious [Fe(CO)<sub>5</sub>(NO)]Cl species<sup>[22]</sup>, we conducted DFT calculations in regard to vibrational spectroscopy and reaction energetics. Although the exotic reaction conditions (liquid HCl as solvent, low temperatures) might stabilize exotic species, several points in the publication raised our doubts.

- *Attempts to prepare the tetrachloroborate complex failed, probably because of a side-reaction between nitrosyl chloride and boron trichloride.*

Another possible conclusion could be the incompatibility of BCl<sub>3</sub> with “[Fe(CO)<sub>5</sub>(NO)]Cl” if the Cl<sup>-</sup> would be bound to the iron in an inner-sphere fashion. Abstraction of the chloride would very likely lead to the decomposition of the labile complex. Furthermore, it also seems curious why an electron deficient cation would not react with an excess of chloride anions in the reaction medium. Furthermore, the fact that *“The solid decomposed very slowly on standing at room temperature, giving off nitrosyl chloride.”* also hints at a molecular compound and not a salt with a chloride counterion.

So we calculated the structures several reasonable Fe(CO)<sub>x</sub>(NO)Cl species (Supplementary Figure 26) and their IR spectra (Supplementary Figure 25). It strikes that the postulated species [Fe(CO)<sub>5</sub>(NO)]<sup>+</sup> and [Fe(CO)<sub>5</sub>(NO)Cl] (which is rather [Fe(CO)<sub>5</sub>(NOCl)]) both feature very weak Fe–N bonds as well as NO stretch vibrations in the region of 1800–1900 cm<sup>-1</sup> (instead of the reported 1610 cm<sup>-1</sup>). The only species with a NO vibration in the range of 1650 cm<sup>-1</sup> would be Fe(CO)<sub>4</sub>(NO)Cl. However, the best agreement with the reported CO stretches (2200w, 2145s, 2125m) shows Fe(CO)<sub>3</sub>(NO)Cl. The calculated reaction enthalpies (Supplementary Table 2) do not give a significant trend which species is preferred especially since some reactions are not isodesmic.

In summary, our DFT calculations do not proof which species was formed in the literature reaction. But however, they show that [Fe(CO)<sub>5</sub>(NO)]<sup>+</sup> and Fe(CO)<sub>5</sub>(NO)Cl both feature not only very weak Fe–N bonds but also NO stretch vibrations far off from the observed 1610 cm<sup>-1</sup> as well as a poor agreement in the CO region. Therefore, in addition to the fact that the species was never reproduced in literature, we think it is reasonable to doubt that the species that was observed in 1968 was [Fe(CO)<sub>5</sub>(NO)]<sup>+</sup>.

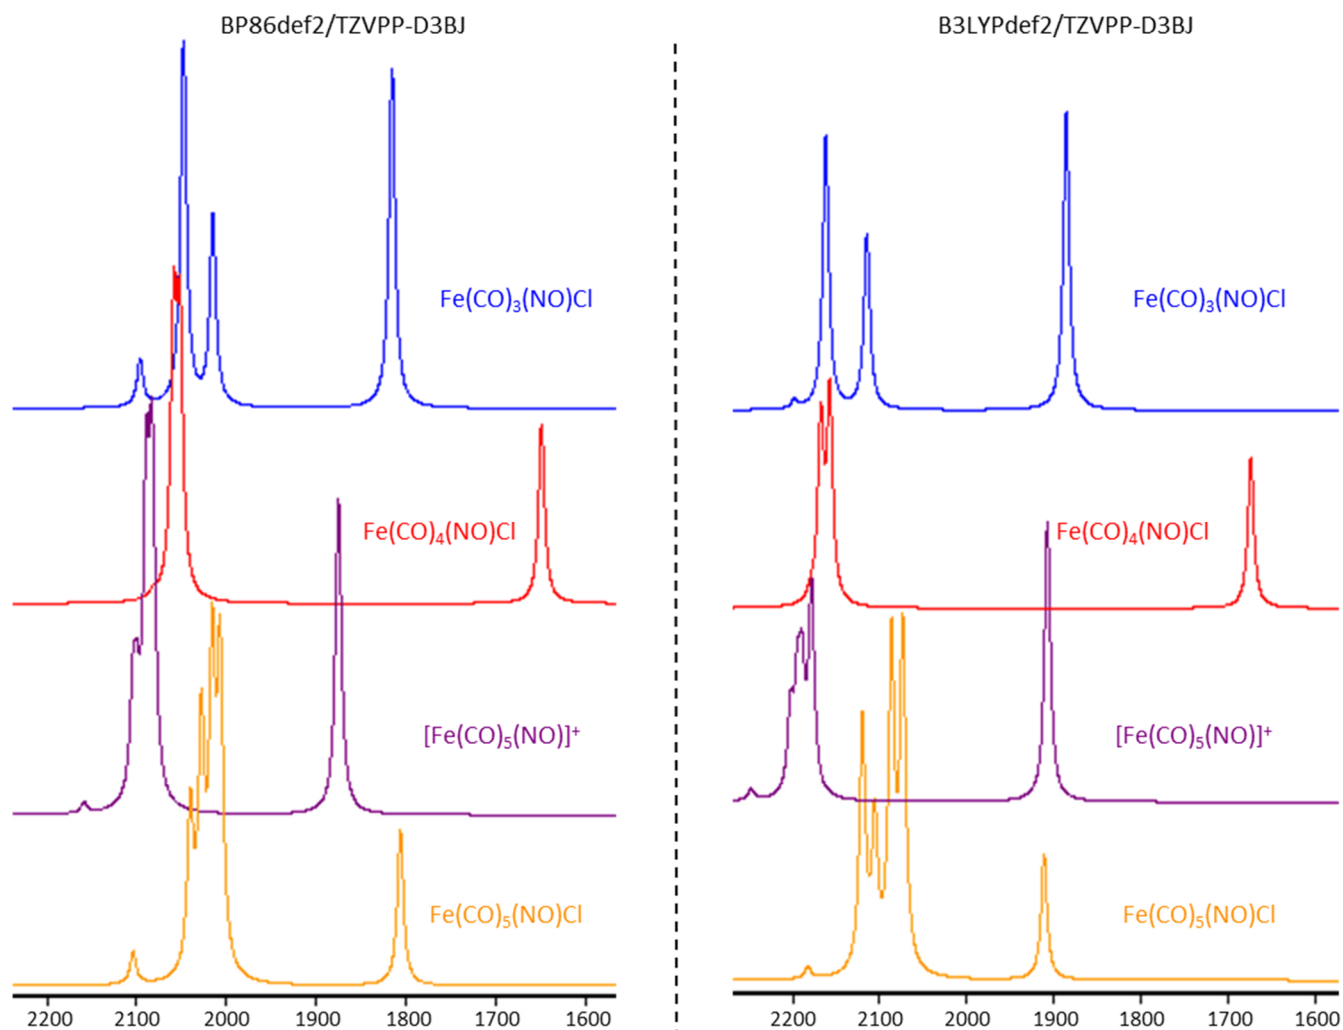

Supplementary Figure 25. Comparison of the calculated (BP86def2/TZVPP-D3BJ left, B3LYPdef2/TZVPP-D3BJ right) IR spectra of  $\text{Fe}(\text{CO})_3(\text{NO})\text{Cl}$  (blue),  $\text{Fe}(\text{CO})_4(\text{NO})\text{Cl}$  (red),  $[\text{Fe}(\text{CO})_5(\text{NO})]^+$  (purple) and  $\text{Fe}(\text{CO})_5(\text{NO})\text{Cl}$  (orange).

Supplementary Table 2. Calculated reaction enthalpies (@BP86def2/TZVPP-D3BJ, B3LYPdef2/TZVPP-D3BJ) for the reaction of  $\text{Fe}(\text{CO})_5$  with  $\text{NOCl}$ .

| Reaction                                                                                                   | $\Delta H_{(\text{gas})}^\circ / \text{kJ mol}^{-1}$ |       | $\Delta G_{(\text{gas})}^\circ / \text{kJ mol}^{-1}$ |       |
|------------------------------------------------------------------------------------------------------------|------------------------------------------------------|-------|------------------------------------------------------|-------|
|                                                                                                            | BP86                                                 | B3LYP | BP86                                                 | B3LYP |
| $\text{Fe}(\text{CO})_5 + \text{NOCl} \rightarrow \text{Fe}(\text{CO})_5(\text{NO})\text{Cl}$              | -14                                                  | -12   | +20                                                  | +21   |
| $\text{Fe}(\text{CO})_5 + \text{NOCl} \rightarrow \text{Fe}(\text{CO})_4(\text{NO})\text{Cl} + \text{CO}$  | +56                                                  | +13   | +53                                                  | +11   |
| $\text{Fe}(\text{CO})_5 + \text{NOCl} \rightarrow \text{Fe}(\text{CO})_5(\text{NO})\text{Cl} + 2\text{CO}$ | +42                                                  | +7    | -3                                                   | -37   |



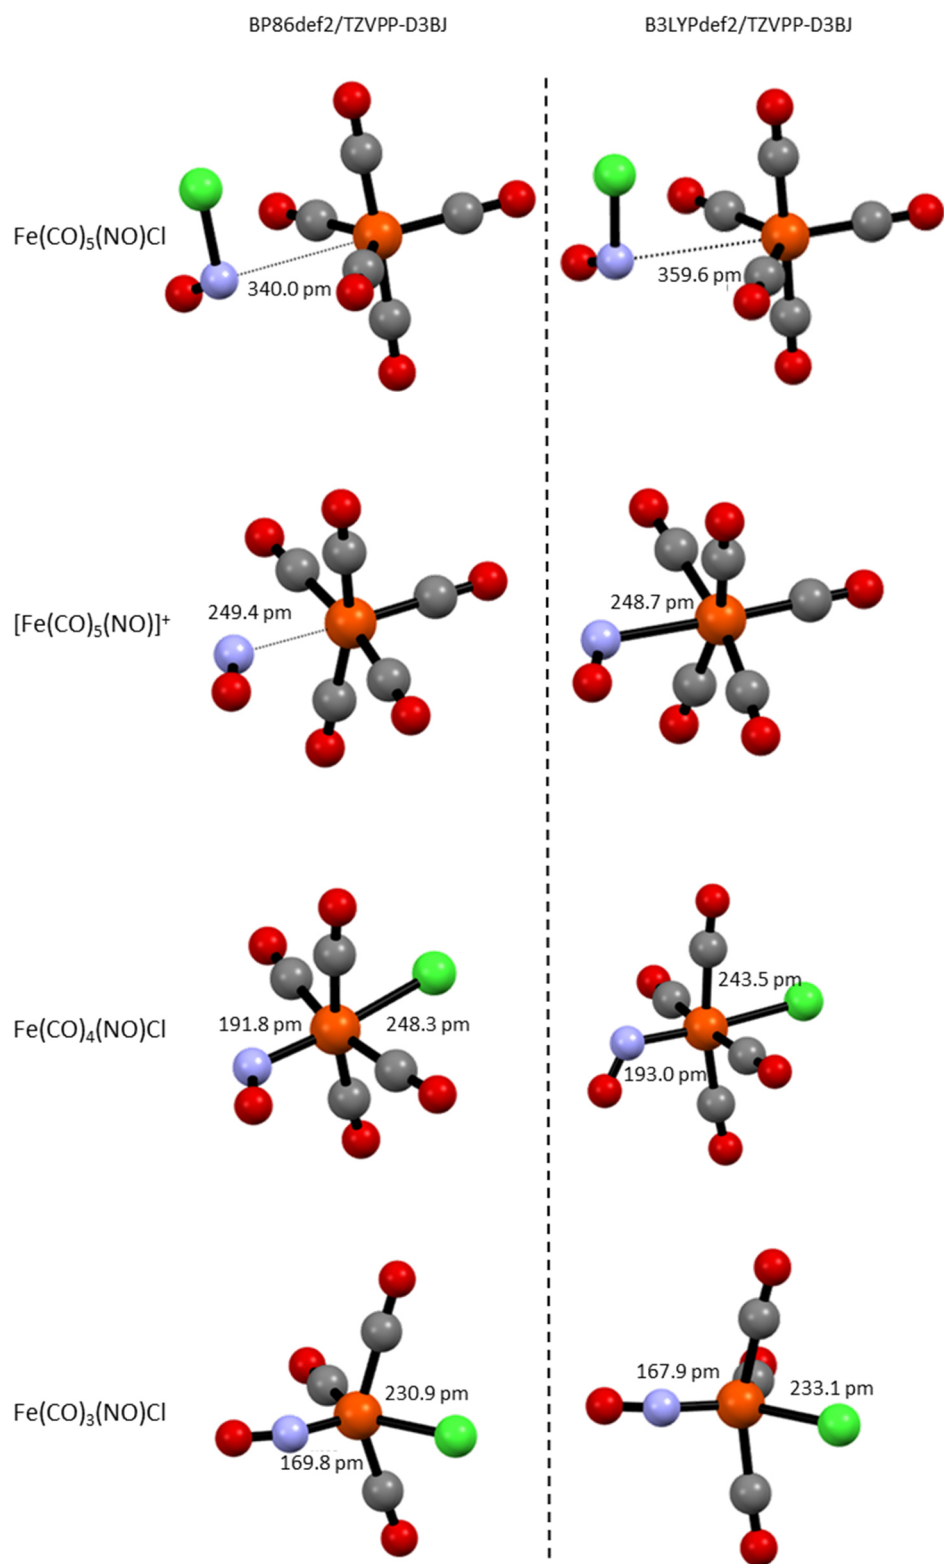

Supplementary Figure 26. Calculated (BP86def2/TZVPP-D3BJ left, B3LYPdef2/TZVPP-D3BJ right) structures and Fe–N/Fe–Cl bond lengths of  $\text{Fe}(\text{CO})_3(\text{NO})\text{Cl}$ ,  $\text{Fe}(\text{CO})_4(\text{NO})\text{Cl}$ ,  $[\text{Fe}(\text{CO})_5(\text{NO})]^+$  and  $\text{Fe}(\text{CO})_5(\text{NO})\text{Cl}$ .

## 8. Single-Crystal XRD Data of Compounds 1 and 2

[Fe(CO)<sub>4</sub>(NO)][F-[Al(OR<sup>F</sup>)<sub>3</sub>]<sub>2</sub>] (1)

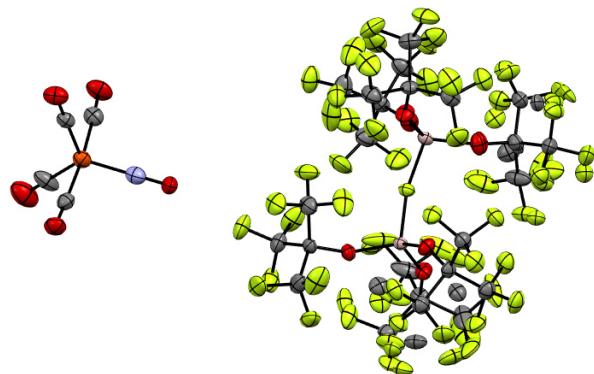

**Table 1 Crystal data and structure refinement for p21c\_a.**

|                                             |                                                                     |
|---------------------------------------------|---------------------------------------------------------------------|
| Identification code                         | p21c_a                                                              |
| Empirical formula                           | C <sub>28</sub> NO <sub>11</sub> F <sub>55</sub> Al <sub>2</sub> Fe |
| Formula weight                              | 1681.10                                                             |
| Temperature/K                               | 293(2)                                                              |
| Crystal system                              | monoclinic                                                          |
| Space group                                 | P2 <sub>1</sub> /c                                                  |
| a/Å                                         | 11.4973(5)                                                          |
| b/Å                                         | 17.8240(7)                                                          |
| c/Å                                         | 24.6741(9)                                                          |
| α/°                                         | 90                                                                  |
| β/°                                         | 95.896(2)                                                           |
| γ/°                                         | 90                                                                  |
| Volume/Å <sup>3</sup>                       | 5029.7(3)                                                           |
| Z                                           | 4                                                                   |
| ρ <sub>calc</sub> /g/cm <sup>3</sup>        | 2.220                                                               |
| μ/mm <sup>-1</sup>                          | 0.595                                                               |
| F(000)                                      | 3240.0                                                              |
| Crystal size/mm <sup>3</sup>                | 0.15 × 0.08 × 0.08                                                  |
| Radiation                                   | MoKα (λ = 0.71073)                                                  |
| 2θ range for data collection/°              | 2.824 to 52.832                                                     |
| Index ranges                                | -14 ≤ h ≤ 14, -19 ≤ k ≤ 22, -30 ≤ l ≤ 30                            |
| Reflections collected                       | 53880                                                               |
| Independent reflections                     | 10282 [R <sub>int</sub> = 0.0211, R <sub>sigma</sub> = 0.0243]      |
| Data/restraints/parameters                  | 10282/8037/1125                                                     |
| Goodness-of-fit on F <sup>2</sup>           | 1.057                                                               |
| Final R indexes [I ≥ 2σ (I)]                | R <sub>1</sub> = 0.0421, wR <sub>2</sub> = 0.1064                   |
| Final R indexes [all data]                  | R <sub>1</sub> = 0.0640, wR <sub>2</sub> = 0.1186                   |
| Largest diff. peak/hole / e Å <sup>-3</sup> | 1.32/-0.51                                                          |

**Table 2 Fractional Atomic Coordinates ( $\times 10^4$ ) and Equivalent Isotropic Displacement Parameters ( $\text{\AA}^2 \times 10^3$ ) for p21c\_a.  $U_{eq}$  is defined as 1/3 of the trace of the orthogonalised  $U_{ij}$  tensor.**

| Atom | x            | y           | z           | $U_{eq}$   |
|------|--------------|-------------|-------------|------------|
| C3   | 8865 (2)     | 8916.0 (16) | 6462.9 (10) | 29.6 (6)   |
| Fe1  | 7540.1 (4)   | 8452.1 (2)  | 6634.2 (2)  | 34.28 (12) |
| N1   | 7565 (2)     | 7445.7 (17) | 6658.5 (9)  | 40.6 (6)   |
| Al1  | 7172.4 (6)   | 2528.0 (4)  | 6513.5 (3)  | 20.44 (16) |
| O1   | 6674 (2)     | 8485.7 (14) | 5453.3 (8)  | 52.8 (6)   |
| C1   | 6996 (3)     | 8458.0 (17) | 5895.6 (12) | 38.2 (7)   |
| O2   | 5467 (3)     | 9294.1 (18) | 6852.2 (11) | 75.6 (8)   |
| C2   | 6252 (3)     | 8974 (2)    | 6767.0 (12) | 48.7 (9)   |
| Al2  | 7787.6 (7)   | 2591.2 (4)  | 5153.0 (3)  | 22.55 (17) |
| O3   | 9687.6 (19)  | 9202.8 (14) | 6354.0 (8)  | 46.3 (5)   |
| F004 | 7388.5 (12)  | 2670.9 (8)  | 5822.6 (5)  | 26.0 (3)   |
| O4   | 8379 (2)     | 8595.8 (12) | 7814.4 (8)  | 44.6 (5)   |
| C4   | 8073 (3)     | 8530.9 (16) | 7374.6 (12) | 34.1 (6)   |
| O5   | 7597.3 (19)  | 6809.3 (12) | 6673.6 (8)  | 40.6 (5)   |
| O1_8 | 6067 (17)    | 2000 (20)   | 6574 (12)   | 25.0 (8)   |
| C1_8 | 4925 (16)    | 1940 (8)    | 6659 (6)    | 31 (3)     |
| C2_8 | 4164 (12)    | 2296 (10)   | 6179 (6)    | 62 (4)     |
| F1_8 | 4060 (18)    | 1845 (12)   | 5740 (7)    | 77 (7)     |
| F2_8 | 3096 (15)    | 2428 (16)   | 6309 (10)   | 78 (8)     |
| F3_8 | 4630 (30)    | 2897 (13)   | 5980 (12)   | 77 (7)     |
| C3_8 | 4719 (13)    | 2337 (7)    | 7198 (5)    | 36 (3)     |
| F4_8 | 5540 (30)    | 2162 (15)   | 7591 (10)   | 37 (5)     |
| F5_8 | 4639 (13)    | 3072 (7)    | 7121 (7)    | 48 (4)     |
| F6_8 | 3700 (20)    | 2149 (17)   | 7376 (15)   | 49 (6)     |
| C4_8 | 4605 (13)    | 1101 (8)    | 6706 (7)    | 59 (4)     |
| F7_8 | 5040 (20)    | 850 (11)    | 7196 (7)    | 81 (6)     |
| F8_8 | 3469 (14)    | 970 (16)    | 6661 (11)   | 92 (8)     |
| F9_8 | 5130 (30)    | 701 (16)    | 6353 (11)   | 75 (9)     |
| O1_6 | 6976.1 (16)  | 3388.5 (10) | 6779.8 (7)  | 27.2 (4)   |
| C1_6 | 7365 (2)     | 4088.4 (14) | 6921.1 (9)  | 24.7 (5)   |
| C2_6 | 7709 (3)     | 4109.1 (16) | 7545.0 (11) | 41.5 (7)   |
| F1_6 | 6952.0 (19)  | 3729.5 (10) | 7807.0 (6)  | 54.4 (5)   |
| F2_6 | 7773 (2)     | 4803.0 (10) | 7740.2 (7)  | 59.6 (6)   |
| F3_6 | 8756.7 (19)  | 3790.0 (12) | 7668.2 (8)  | 64.8 (6)   |
| C3_6 | 8438 (3)     | 4300.4 (17) | 6622.7 (12) | 39.2 (7)   |
| F4_6 | 8107.0 (19)  | 4479.1 (12) | 6108.2 (7)  | 58.8 (5)   |
| F5_6 | 9150.3 (16)  | 3711.4 (11) | 6614.1 (10) | 63.1 (6)   |
| F6_6 | 9043.8 (16)  | 4869.8 (10) | 6851.2 (8)  | 51.0 (5)   |
| C4_6 | 6367 (3)     | 4648.6 (15) | 6771.9 (12) | 36.9 (7)   |
| F7_6 | 5843.5 (17)  | 4512.6 (11) | 6286.0 (8)  | 55.7 (5)   |
| F8_6 | 6755.6 (17)  | 5356.9 (9)  | 6782.2 (8)  | 51.1 (5)   |
| F9_6 | 5563.8 (16)  | 4605.6 (10) | 7125.5 (9)  | 54.1 (5)   |
| O1_5 | 8417.6 (16)  | 2050.8 (10) | 6738.9 (7)  | 31.5 (4)   |
| C1_5 | 8985 (2)     | 1559.5 (14) | 7090.6 (10) | 26.6 (5)   |
| C2_5 | 9065 (3)     | 1870.8 (16) | 7680.8 (11) | 37.0 (7)   |
| F1_5 | 9903.2 (15)  | 2401.5 (10) | 7756.8 (7)  | 42.7 (4)   |
| F2_5 | 9324.8 (18)  | 1335.8 (10) | 8051.4 (6)  | 50.7 (5)   |
| F3_5 | 8063.9 (15)  | 2184.1 (10) | 7777.0 (7)  | 44.4 (4)   |
| C3_5 | 8325 (3)     | 799.4 (16)  | 7076.5 (11) | 37.0 (7)   |
| F4_5 | 7953.0 (16)  | 611.5 (9)   | 6563.2 (7)  | 44.8 (4)   |
| F5_5 | 7396.4 (16)  | 834.5 (10)  | 7353.0 (8)  | 48.9 (5)   |
| F6_5 | 9005.2 (17)  | 234.9 (9)   | 7282.5 (7)  | 46.4 (4)   |
| C4_5 | 10229 (3)    | 1445.0 (16) | 6925.2 (11) | 34.1 (6)   |
| F7_5 | 10209.4 (16) | 998.9 (9)   | 6488.3 (6)  | 43.5 (4)   |
| F8_5 | 10947.5 (15) | 1140.0 (10) | 7323.9 (7)  | 44.6 (4)   |
| F9_5 | 10696.5 (14) | 2097.3 (9)  | 6797.2 (7)  | 37.6 (4)   |
| O1_4 | 5918 (3)     | 1989 (4)    | 6499 (2)    | 25.0 (8)   |
| C1_4 | 4789 (4)     | 1964 (2)    | 6623.9 (14) | 23.3 (8)   |
| C2_4 | 4770 (3)     | 1801 (2)    | 7241.5 (12) | 37.0 (9)   |
| F1_4 | 4998 (4)     | 1090 (2)    | 7356.0 (13) | 57.6 (11)  |
| F2_4 | 3729 (5)     | 1951 (4)    | 7412 (3)    | 49.8 (13)  |
| F3_4 | 5570 (6)     | 2229 (4)    | 7527 (2)    | 52.8 (16)  |
| C3_4 | 4135 (3)     | 2708 (2)    | 6487.7 (14) | 35.6 (8)   |

|      |              |             |             |           |
|------|--------------|-------------|-------------|-----------|
| F4_4 | 4441 (6)     | 3000 (2)    | 6036 (3)    | 52.7 (12) |
| F5_4 | 4375 (3)     | 3222.7 (16) | 6873.2 (14) | 48.8 (8)  |
| F6_4 | 2975 (3)     | 2620 (2)    | 6430.6 (18) | 43.4 (8)  |
| C4_4 | 4168 (3)     | 1320 (2)    | 6290.4 (14) | 35.3 (8)  |
| F7_4 | 3917 (4)     | 1515 (2)    | 5778.3 (16) | 52.0 (10) |
| F8_4 | 3172 (3)     | 1119 (3)    | 6486.6 (18) | 46.6 (8)  |
| F9_4 | 4835 (5)     | 721 (3)     | 6291.0 (19) | 45.1 (10) |
| O1_3 | 6669.3 (17)  | 2955.4 (11) | 4736.7 (7)  | 36.9 (5)  |
| C1_3 | 6081 (2)     | 3533.7 (15) | 4475.0 (10) | 29.9 (6)  |
| C2_3 | 4892 (3)     | 3629 (2)    | 4706.3 (13) | 51.6 (8)  |
| F1_3 | 4394.2 (19)  | 2977.1 (12) | 4776.0 (10) | 70.9 (6)  |
| F2_3 | 4150.9 (16)  | 4052.2 (12) | 4388.1 (9)  | 62.0 (6)  |
| F3_3 | 5060 (3)     | 3950.6 (13) | 5197.4 (8)  | 81.4 (8)  |
| C3_3 | 6777 (3)     | 4269.8 (18) | 4546.1 (14) | 48.7 (8)  |
| F4_3 | 7656.3 (18)  | 4260.5 (12) | 4223.4 (11) | 74.1 (7)  |
| F5_3 | 7271 (2)     | 4342.6 (11) | 5047.0 (9)  | 76.3 (7)  |
| F6_3 | 6139.3 (17)  | 4874.4 (10) | 4417.8 (8)  | 54.9 (5)  |
| C4_3 | 5872 (3)     | 3338.5 (18) | 3862.2 (11) | 42.6 (7)  |
| F7_3 | 6797.4 (17)  | 3033.9 (11) | 3685.8 (7)  | 53.4 (5)  |
| F8_3 | 5571.1 (19)  | 3935.4 (11) | 3559.8 (7)  | 59.3 (6)  |
| F9_3 | 5006.3 (17)  | 2825.5 (12) | 3773.4 (8)  | 59.3 (5)  |
| O1_2 | 9074.3 (16)  | 3061.7 (11) | 5176.8 (8)  | 37.9 (5)  |
| C1_2 | 10200 (2)    | 3100.8 (15) | 5063.6 (10) | 28.9 (6)  |
| C2_2 | 10832 (3)    | 2344.0 (18) | 5179.8 (11) | 39.4 (7)  |
| F1_2 | 10507 (2)    | 2028.9 (11) | 5623.0 (7)  | 59.4 (5)  |
| F2_2 | 11992.7 (16) | 2420.3 (12) | 5240.5 (8)  | 59.4 (5)  |
| F3_2 | 10574.8 (16) | 1863.5 (10) | 4769.9 (7)  | 47.3 (4)  |
| C3_2 | 10257 (3)    | 3313.0 (18) | 4457.0 (11) | 41.0 (7)  |
| F4_2 | 10052.6 (18) | 4031.2 (11) | 4368.2 (8)  | 58.1 (5)  |
| F5_2 | 9460.7 (18)  | 2920.9 (11) | 4145.8 (7)  | 57.3 (5)  |
| F6_2 | 11300.2 (18) | 3155.4 (13) | 4295.4 (8)  | 61.9 (6)  |
| C4_2 | 10817 (3)    | 3719.6 (18) | 5434.4 (12) | 42.0 (7)  |
| F7_2 | 10151.5 (17) | 4324.1 (10) | 5440.5 (8)  | 52.2 (5)  |
| F8_2 | 11830.4 (16) | 3925.3 (12) | 5262.0 (9)  | 61.6 (6)  |
| F9_2 | 11027.5 (19) | 3474.2 (12) | 5940.3 (7)  | 59.3 (5)  |
| O1_1 | 7937 (6)     | 1656 (3)    | 5073 (2)    | 34.0 (6)  |
| C1_1 | 7516 (4)     | 1028 (2)    | 4813.6 (17) | 30.5 (10) |
| C2_1 | 7310 (4)     | 1139 (2)    | 4183.4 (13) | 38.0 (9)  |
| F1_1 | 6302 (3)     | 1489.7 (19) | 4044.4 (11) | 45.0 (8)  |
| F2_1 | 7264 (6)     | 495 (4)     | 3919 (3)    | 57.8 (18) |
| F3_1 | 8140 (7)     | 1558 (3)    | 4009 (3)    | 43.4 (13) |
| C3_1 | 8427 (3)     | 399.5 (18)  | 4945.5 (14) | 40.1 (9)  |
| F4_1 | 8832 (4)     | 413 (5)     | 5467 (3)    | 45.0 (13) |
| F5_1 | 9328 (4)     | 490 (3)     | 4655.2 (16) | 54.0 (11) |
| F6_1 | 7994 (4)     | -287.5 (16) | 4836.1 (14) | 60.3 (10) |
| C4_1 | 6352 (3)     | 799 (3)     | 5023.2 (14) | 48.1 (11) |
| F7_1 | 6534 (5)     | 488 (4)     | 5517 (2)    | 57.4 (16) |
| F8_1 | 5767 (4)     | 308 (2)     | 4686.1 (18) | 72.6 (15) |
| F9_1 | 5672 (6)     | 1380 (5)    | 5078 (2)    | 66 (2)    |
| O1_7 | 7870 (30)    | 1617 (15)   | 5026 (10)   | 34.0 (6)  |
| C1_7 | 7372 (12)    | 976 (9)     | 4823 (6)    | 28 (3)    |
| C2_7 | 7553 (11)    | 322 (7)     | 5230 (5)    | 33 (3)    |
| F1_7 | 8593 (17)    | 340 (20)    | 5508 (11)   | 36 (5)    |
| F2_7 | 7469 (14)    | -327 (7)    | 4963 (6)    | 47 (3)    |
| F3_7 | 6740 (20)    | 298 (14)    | 5579 (9)    | 35 (4)    |
| C3_7 | 6057 (11)    | 1088 (8)    | 4648 (5)    | 42 (3)    |
| F4_7 | 5858 (11)    | 1487 (8)    | 4199 (5)    | 37 (3)    |
| F5_7 | 5640 (20)    | 1498 (18)   | 5041 (10)   | 46 (5)    |
| F6_7 | 5454 (16)    | 464 (9)     | 4579 (10)   | 67 (6)    |
| C4_7 | 8022 (13)    | 820 (8)     | 4318 (5)    | 39 (3)    |
| F7_7 | 8190 (30)    | 1460 (15)   | 4060 (15)   | 46 (6)    |
| F8_7 | 7490 (20)    | 347 (16)    | 3962 (12)   | 47 (6)    |
| F9_7 | 9089 (15)    | 540 (13)    | 4468 (7)    | 45 (4)    |

**Table 3 Bond Lengths for p21c\_a.**

| Atom | Atom | Length/Å    | Atom | Atom | Length/Å    |
|------|------|-------------|------|------|-------------|
| C3   | Fe1  | 1.821 (3)   | C3_4 | F4_4 | 1.310 (6)   |
| C3   | O3   | 1.131 (3)   | C3_4 | F5_4 | 1.330 (4)   |
| Fe1  | N1   | 1.795 (3)   | C3_4 | F6_4 | 1.336 (5)   |
| Fe1  | C1   | 1.865 (3)   | C4_4 | F7_4 | 1.314 (5)   |
| Fe1  | C2   | 1.807 (3)   | C4_4 | F8_4 | 1.338 (5)   |
| Fe1  | C4   | 1.872 (3)   | C4_4 | F9_4 | 1.314 (5)   |
| N1   | O5   | 1.135 (3)   | O1_3 | Al2  | 1.6906 (19) |
| All  | F004 | 1.7662 (14) | O1_3 | C1_3 | 1.359 (3)   |
| O1   | C1   | 1.117 (3)   | C1_3 | C2_3 | 1.544 (4)   |
| O2   | C2   | 1.106 (4)   | C1_3 | C3_3 | 1.538 (4)   |
| Al2  | F004 | 1.7654 (14) | C1_3 | C4_3 | 1.546 (3)   |
| O4   | C4   | 1.112 (3)   | C2_3 | F1_3 | 1.314 (4)   |
| O1_8 | All  | 1.60 (2)    | C2_3 | F2_3 | 1.332 (4)   |
| O1_8 | C1_8 | 1.355 (11)  | C2_3 | F3_3 | 1.337 (4)   |
| C1_8 | C2_8 | 1.536 (12)  | C3_3 | F4_3 | 1.349 (4)   |
| C1_8 | C3_8 | 1.544 (12)  | C3_3 | F5_3 | 1.312 (4)   |
| C1_8 | C4_8 | 1.547 (12)  | C3_3 | F6_3 | 1.324 (3)   |
| C2_8 | F1_8 | 1.343 (13)  | C4_3 | F7_3 | 1.309 (3)   |
| C2_8 | F2_8 | 1.322 (12)  | C4_3 | F8_3 | 1.325 (3)   |
| C2_8 | F3_8 | 1.314 (13)  | C4_3 | F9_3 | 1.352 (4)   |
| C3_8 | F4_8 | 1.319 (13)  | O1_2 | Al2  | 1.696 (2)   |
| C3_8 | F5_8 | 1.325 (12)  | O1_2 | C1_2 | 1.354 (3)   |
| C3_8 | F6_8 | 1.340 (13)  | C1_2 | C2_2 | 1.545 (4)   |
| C4_8 | F7_8 | 1.337 (13)  | C1_2 | C3_2 | 1.552 (4)   |
| C4_8 | F8_8 | 1.320 (13)  | C1_2 | C4_2 | 1.557 (4)   |
| C4_8 | F9_8 | 1.318 (13)  | C2_2 | F1_2 | 1.317 (3)   |
| O1_6 | All  | 1.6929 (18) | C2_2 | F2_2 | 1.335 (3)   |
| O1_6 | C1_6 | 1.358 (3)   | C2_2 | F3_2 | 1.335 (3)   |
| C1_6 | C2_6 | 1.550 (3)   | C3_2 | F4_2 | 1.316 (4)   |
| C1_6 | C3_6 | 1.548 (4)   | C3_2 | F5_2 | 1.331 (3)   |
| C1_6 | C4_6 | 1.537 (4)   | C3_2 | F6_2 | 1.332 (3)   |
| C2_6 | F1_6 | 1.322 (3)   | C4_2 | F7_2 | 1.322 (4)   |
| C2_6 | F2_6 | 1.327 (3)   | C4_2 | F8_2 | 1.332 (3)   |
| C2_6 | F3_6 | 1.338 (4)   | C4_2 | F9_2 | 1.321 (3)   |
| C3_6 | F4_6 | 1.326 (3)   | O1_1 | Al2  | 1.689 (6)   |
| C3_6 | F5_6 | 1.333 (4)   | O1_1 | C1_1 | 1.354 (4)   |
| C3_6 | F6_6 | 1.324 (3)   | C1_1 | C2_1 | 1.561 (5)   |
| C4_6 | F7_6 | 1.308 (3)   | C1_1 | C3_1 | 1.546 (5)   |
| C4_6 | F8_6 | 1.339 (3)   | C1_1 | C4_1 | 1.538 (5)   |
| C4_6 | F9_6 | 1.336 (3)   | C2_1 | F1_1 | 1.331 (5)   |
| O1_5 | All  | 1.7085 (19) | C2_1 | F2_1 | 1.318 (5)   |
| O1_5 | C1_5 | 1.353 (3)   | C2_1 | F3_1 | 1.318 (7)   |
| C1_5 | C2_5 | 1.552 (4)   | C3_1 | F4_1 | 1.322 (6)   |
| C1_5 | C3_5 | 1.552 (4)   | C3_1 | F5_1 | 1.328 (5)   |
| C1_5 | C4_5 | 1.541 (4)   | C3_1 | F6_1 | 1.339 (4)   |
| C2_5 | F1_5 | 1.349 (3)   | C4_1 | F7_1 | 1.336 (6)   |
| C2_5 | F2_5 | 1.334 (3)   | C4_1 | F8_1 | 1.341 (5)   |
| C2_5 | F3_5 | 1.323 (3)   | C4_1 | F9_1 | 1.313 (7)   |
| C3_5 | F4_5 | 1.337 (3)   | O1_7 | Al2  | 1.77 (2)    |
| C3_5 | F5_5 | 1.326 (3)   | O1_7 | C1_7 | 1.353 (11)  |
| C3_5 | F6_5 | 1.342 (3)   | C1_7 | C2_7 | 1.539 (12)  |
| C4_5 | F7_5 | 1.338 (3)   | C1_7 | C3_7 | 1.542 (12)  |
| C4_5 | F8_5 | 1.334 (3)   | C1_7 | C4_7 | 1.541 (12)  |
| C4_5 | F9_5 | 1.332 (3)   | C2_7 | F1_7 | 1.316 (13)  |
| O1_4 | All  | 1.730 (5)   | C2_7 | F2_7 | 1.331 (12)  |
| O1_4 | C1_4 | 1.365 (4)   | C2_7 | F3_7 | 1.333 (13)  |
| C1_4 | C2_4 | 1.554 (4)   | C3_7 | F4_7 | 1.316 (12)  |
| C1_4 | C3_4 | 1.544 (5)   | C3_7 | F5_7 | 1.342 (13)  |
| C1_4 | C4_4 | 1.544 (5)   | C3_7 | F6_7 | 1.312 (13)  |
| C2_4 | F1_4 | 1.319 (5)   | C4_7 | F7_7 | 1.329 (13)  |
| C2_4 | F2_4 | 1.334 (6)   | C4_7 | F8_7 | 1.321 (13)  |
| C2_4 | F3_4 | 1.339 (7)   | C4_7 | F9_7 | 1.341 (13)  |

**Table 4 Bond Angles for p21c\_a.**

| Atom | Atom | Atom | Angle/°    | Atom | Atom | Atom | Angle/°    |
|------|------|------|------------|------|------|------|------------|
| O3   | C3   | Fe1  | 179.7(3)   | F1_4 | C2_4 | F3_4 | 108.9(4)   |
| C3   | Fe1  | C1   | 88.58(12)  | F2_4 | C2_4 | C1_4 | 112.0(4)   |
| C3   | Fe1  | C4   | 89.70(12)  | F2_4 | C2_4 | F3_4 | 108.1(5)   |
| N1   | Fe1  | C3   | 116.78(12) | F3_4 | C2_4 | C1_4 | 109.4(4)   |
| N1   | Fe1  | C1   | 92.35(12)  | F4_4 | C3_4 | C1_4 | 111.0(4)   |
| N1   | Fe1  | C2   | 121.28(15) | F4_4 | C3_4 | F5_4 | 106.3(4)   |
| N1   | Fe1  | C4   | 92.28(11)  | F4_4 | C3_4 | F6_4 | 108.0(4)   |
| C1   | Fe1  | C4   | 175.35(14) | F5_4 | C3_4 | C1_4 | 112.1(3)   |
| C2   | Fe1  | C3   | 121.93(16) | F5_4 | C3_4 | F6_4 | 106.8(3)   |
| C2   | Fe1  | C1   | 88.59(13)  | F6_4 | C3_4 | C1_4 | 112.3(3)   |
| C2   | Fe1  | C4   | 88.66(13)  | F7_4 | C4_4 | C1_4 | 111.1(3)   |
| O5   | N1   | Fe1  | 179.1(2)   | F7_4 | C4_4 | F8_4 | 107.9(4)   |
| O1_8 | Al1  | F004 | 111.5(11)  | F7_4 | C4_4 | F9_4 | 106.7(4)   |
| O1_8 | Al1  | O1_6 | 111.0(12)  | F8_4 | C4_4 | C1_4 | 111.9(3)   |
| O1_8 | Al1  | O1_5 | 108.8(12)  | F9_4 | C4_4 | C1_4 | 111.5(4)   |
| O1_6 | Al1  | F004 | 106.35(8)  | F9_4 | C4_4 | F8_4 | 107.6(4)   |
| O1_6 | Al1  | O1_5 | 117.73(10) | C1_3 | O1_3 | Al2  | 152.88(19) |
| O1_6 | Al1  | O1_4 | 111.5(2)   | O1_3 | C1_3 | C2_3 | 108.9(2)   |
| O1_5 | Al1  | F004 | 100.94(8)  | O1_3 | C1_3 | C3_3 | 111.4(2)   |
| O1_5 | Al1  | O1_4 | 113.5(2)   | O1_3 | C1_3 | C4_3 | 108.3(2)   |
| O1_4 | Al1  | F004 | 105.09(18) | C2_3 | C1_3 | C4_3 | 109.3(2)   |
| O1   | C1   | Fe1  | 177.8(3)   | C3_3 | C1_3 | C2_3 | 109.5(2)   |
| O2   | C2   | Fe1  | 179.5(3)   | C3_3 | C1_3 | C4_3 | 109.3(2)   |
| F004 | Al2  | O1_7 | 105.6(7)   | F1_3 | C2_3 | C1_3 | 111.4(3)   |
| O1_3 | Al2  | F004 | 106.45(9)  | F1_3 | C2_3 | F2_3 | 108.5(3)   |
| O1_3 | Al2  | O1_2 | 115.93(11) | F1_3 | C2_3 | F3_3 | 106.6(3)   |
| O1_2 | Al2  | F004 | 103.73(9)  | F2_3 | C2_3 | C1_3 | 112.4(3)   |
| O1_2 | Al2  | O1_7 | 115.3(10)  | F2_3 | C2_3 | F3_3 | 108.4(3)   |
| O1_1 | Al2  | F004 | 103.18(17) | F3_3 | C2_3 | C1_3 | 109.3(3)   |
| O1_1 | Al2  | O1_3 | 112.8(3)   | F4_3 | C3_3 | C1_3 | 109.6(3)   |
| O1_1 | Al2  | O1_2 | 113.2(2)   | F5_3 | C3_3 | C1_3 | 111.2(3)   |
| Al2  | F004 | Al1  | 165.37(10) | F5_3 | C3_3 | F4_3 | 106.2(3)   |
| O4   | C4   | Fe1  | 178.2(3)   | F5_3 | C3_3 | F6_3 | 108.7(3)   |
| C1_8 | O1_8 | Al1  | 148(3)     | F6_3 | C3_3 | C1_3 | 113.5(3)   |
| O1_8 | C1_8 | C2_8 | 109.4(16)  | F6_3 | C3_3 | F4_3 | 107.4(3)   |
| O1_8 | C1_8 | C3_8 | 109.6(16)  | F7_3 | C4_3 | C1_3 | 111.6(2)   |
| O1_8 | C1_8 | C4_8 | 109.1(17)  | F7_3 | C4_3 | F8_3 | 108.7(2)   |
| C2_8 | C1_8 | C3_8 | 110.5(11)  | F7_3 | C4_3 | F9_3 | 106.0(3)   |
| C2_8 | C1_8 | C4_8 | 109.6(12)  | F8_3 | C4_3 | C1_3 | 112.1(2)   |
| C3_8 | C1_8 | C4_8 | 108.6(11)  | F8_3 | C4_3 | F9_3 | 107.9(2)   |
| F1_8 | C2_8 | C1_8 | 111.8(13)  | F9_3 | C4_3 | C1_3 | 110.4(2)   |
| F2_8 | C2_8 | C1_8 | 110.9(14)  | C1_2 | O1_2 | Al2  | 150.14(19) |
| F2_8 | C2_8 | F1_8 | 107.1(15)  | O1_2 | C1_2 | C2_2 | 111.0(2)   |
| F3_8 | C2_8 | C1_8 | 113.9(16)  | O1_2 | C1_2 | C3_2 | 110.3(2)   |
| F3_8 | C2_8 | F1_8 | 101.1(16)  | O1_2 | C1_2 | C4_2 | 107.6(2)   |
| F3_8 | C2_8 | F2_8 | 111.5(18)  | C2_2 | C1_2 | C3_2 | 109.0(2)   |
| F4_8 | C3_8 | C1_8 | 111.3(14)  | C2_2 | C1_2 | C4_2 | 109.4(2)   |
| F4_8 | C3_8 | F5_8 | 111.9(16)  | C3_2 | C1_2 | C4_2 | 109.4(2)   |
| F4_8 | C3_8 | F6_8 | 106.6(18)  | F1_2 | C2_2 | C1_2 | 111.0(2)   |
| F5_8 | C3_8 | C1_8 | 110.1(11)  | F1_2 | C2_2 | F2_2 | 108.4(2)   |
| F5_8 | C3_8 | F6_8 | 104.1(15)  | F1_2 | C2_2 | F3_2 | 107.2(3)   |
| F6_8 | C3_8 | C1_8 | 112.7(17)  | F2_2 | C2_2 | C1_2 | 112.2(3)   |
| F7_8 | C4_8 | C1_8 | 108.8(13)  | F2_2 | C2_2 | F3_2 | 106.9(2)   |
| F8_8 | C4_8 | C1_8 | 113.9(15)  | F3_2 | C2_2 | C1_2 | 110.9(2)   |
| F8_8 | C4_8 | F7_8 | 107.0(16)  | F4_2 | C3_2 | C1_2 | 111.9(2)   |
| F9_8 | C4_8 | C1_8 | 110.3(15)  | F4_2 | C3_2 | F5_2 | 108.3(2)   |
| F9_8 | C4_8 | F7_8 | 105.3(17)  | F4_2 | C3_2 | F6_2 | 107.8(2)   |
| F9_8 | C4_8 | F8_8 | 111.1(17)  | F5_2 | C3_2 | C1_2 | 109.5(2)   |
| C1_6 | O1_6 | Al1  | 151.43(17) | F5_2 | C3_2 | F6_2 | 107.7(3)   |
| O1_6 | C1_6 | C2_6 | 108.7(2)   | F6_2 | C3_2 | C1_2 | 111.5(2)   |
| O1_6 | C1_6 | C3_6 | 111.1(2)   | F7_2 | C4_2 | C1_2 | 110.8(2)   |
| O1_6 | C1_6 | C4_6 | 108.5(2)   | F7_2 | C4_2 | F8_2 | 107.8(3)   |
| C3_6 | C1_6 | C2_6 | 109.4(2)   | F8_2 | C4_2 | C1_2 | 111.6(2)   |
| C4_6 | C1_6 | C2_6 | 109.3(2)   | F9_2 | C4_2 | C1_2 | 110.4(3)   |

|                |            |                |           |
|----------------|------------|----------------|-----------|
| C4_6 C1_6 C3_6 | 109.9(2)   | F9_2 C4_2 F7_2 | 108.0(2)  |
| F1_6 C2_6 C1_6 | 111.1(2)   | F9_2 C4_2 F8_2 | 108.1(3)  |
| F1_6 C2_6 F2_6 | 108.3(2)   | C1_1 O1_1 Al2  | 146.7(6)  |
| F1_6 C2_6 F3_6 | 107.1(2)   | O1_1 C1_1 C2_1 | 112.1(4)  |
| F2_6 C2_6 C1_6 | 112.4(2)   | O1_1 C1_1 C3_1 | 107.3(5)  |
| F2_6 C2_6 F3_6 | 107.4(2)   | O1_1 C1_1 C4_1 | 109.9(4)  |
| F3_6 C2_6 C1_6 | 110.3(2)   | C3_1 C1_1 C2_1 | 109.3(3)  |
| F4_6 C3_6 C1_6 | 110.5(2)   | C4_1 C1_1 C2_1 | 108.7(3)  |
| F4_6 C3_6 F5_6 | 106.9(2)   | C4_1 C1_1 C3_1 | 109.3(3)  |
| F5_6 C3_6 C1_6 | 109.7(2)   | F1_1 C2_1 C1_1 | 110.8(3)  |
| F6_6 C3_6 C1_6 | 113.3(2)   | F2_1 C2_1 C1_1 | 112.2(4)  |
| F6_6 C3_6 F4_6 | 108.1(2)   | F2_1 C2_1 F1_1 | 106.9(4)  |
| F6_6 C3_6 F5_6 | 108.3(2)   | F2_1 C2_1 F3_1 | 109.0(5)  |
| F7_6 C4_6 C1_6 | 111.2(2)   | F3_1 C2_1 C1_1 | 110.9(5)  |
| F7_6 C4_6 F8_6 | 108.3(2)   | F3_1 C2_1 F1_1 | 106.9(4)  |
| F7_6 C4_6 F9_6 | 107.7(2)   | F4_1 C3_1 C1_1 | 110.8(4)  |
| F8_6 C4_6 C1_6 | 111.6(2)   | F4_1 C3_1 F5_1 | 107.8(4)  |
| F9_6 C4_6 C1_6 | 110.8(2)   | F4_1 C3_1 F6_1 | 107.4(4)  |
| F9_6 C4_6 F8_6 | 107.1(2)   | F5_1 C3_1 C1_1 | 110.3(3)  |
| C1_5 O1_5 Al1  | 149.79(18) | F5_1 C3_1 F6_1 | 107.3(4)  |
| O1_5 C1_5 C2_5 | 110.4(2)   | F6_1 C3_1 C1_1 | 113.0(4)  |
| O1_5 C1_5 C3_5 | 110.4(2)   | F7_1 C4_1 C1_1 | 110.9(4)  |
| O1_5 C1_5 C4_5 | 108.4(2)   | F7_1 C4_1 F8_1 | 108.4(5)  |
| C3_5 C1_5 C2_5 | 108.3(2)   | F8_1 C4_1 C1_1 | 111.3(3)  |
| C4_5 C1_5 C2_5 | 109.2(2)   | F9_1 C4_1 C1_1 | 112.0(5)  |
| C4_5 C1_5 C3_5 | 110.1(2)   | F9_1 C4_1 F7_1 | 105.8(5)  |
| F1_5 C2_5 C1_5 | 110.7(2)   | F9_1 C4_1 F8_1 | 108.2(5)  |
| F2_5 C2_5 C1_5 | 112.0(2)   | C1_7 O1_7 Al2  | 150(3)    |
| F2_5 C2_5 F1_5 | 107.4(2)   | O1_7 C1_7 C2_7 | 111.9(17) |
| F3_5 C2_5 C1_5 | 110.5(2)   | O1_7 C1_7 C3_7 | 111.3(18) |
| F3_5 C2_5 F1_5 | 107.5(2)   | O1_7 C1_7 C4_7 | 103.2(11) |
| F3_5 C2_5 F2_5 | 108.4(2)   | C2_7 C1_7 C3_7 | 110.1(10) |
| F4_5 C3_5 C1_5 | 110.4(2)   | C2_7 C1_7 C4_7 | 110.2(10) |
| F4_5 C3_5 F6_5 | 106.7(2)   | C4_7 C1_7 C3_7 | 109.9(11) |
| F5_5 C3_5 C1_5 | 111.4(2)   | F1_7 C2_7 C1_7 | 112.2(16) |
| F5_5 C3_5 F4_5 | 107.7(2)   | F1_7 C2_7 F2_7 | 107.2(17) |
| F5_5 C3_5 F6_5 | 108.0(2)   | F1_7 C2_7 F3_7 | 108.7(16) |
| F6_5 C3_5 C1_5 | 112.4(2)   | F2_7 C2_7 C1_7 | 109.7(11) |
| F7_5 C4_5 C1_5 | 110.7(2)   | F2_7 C2_7 F3_7 | 105.8(15) |
| F8_5 C4_5 C1_5 | 112.3(2)   | F3_7 C2_7 C1_7 | 113.0(12) |
| F8_5 C4_5 F7_5 | 108.1(2)   | F4_7 C3_7 C1_7 | 112.7(11) |
| F9_5 C4_5 C1_5 | 110.8(2)   | F4_7 C3_7 F5_7 | 105.6(17) |
| F9_5 C4_5 F7_5 | 107.6(2)   | F5_7 C3_7 C1_7 | 106.3(13) |
| F9_5 C4_5 F8_5 | 107.2(2)   | F6_7 C3_7 C1_7 | 114.6(12) |
| C1_4 O1_4 Al1  | 145.5(5)   | F6_7 C3_7 F4_7 | 107.8(13) |
| O1_4 C1_4 C2_4 | 109.7(4)   | F6_7 C3_7 F5_7 | 109.4(17) |
| O1_4 C1_4 C3_4 | 112.1(4)   | F7_7 C4_7 C1_7 | 109.8(17) |
| O1_4 C1_4 C4_4 | 107.6(4)   | F7_7 C4_7 F9_7 | 106.2(18) |
| C3_4 C1_4 C2_4 | 108.6(3)   | F8_7 C4_7 C1_7 | 115.2(16) |
| C4_4 C1_4 C2_4 | 109.4(3)   | F8_7 C4_7 F7_7 | 107.8(18) |
| C4_4 C1_4 C3_4 | 109.6(3)   | F8_7 C4_7 F9_7 | 106.9(16) |
| F1_4 C2_4 C1_4 | 111.5(3)   | F9_7 C4_7 C1_7 | 110.6(11) |
| F1_4 C2_4 F2_4 | 106.8(4)   |                |           |

## P-1 structure of 1

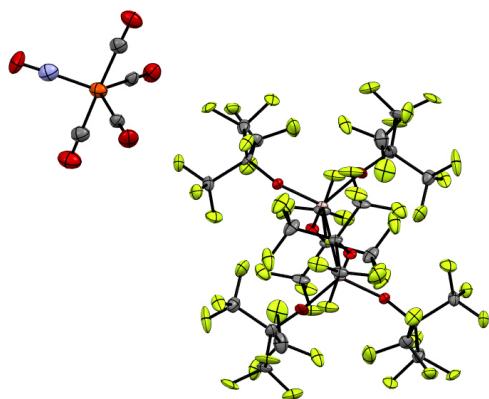

**Table 1 Crystal data and structure refinement for p-1\_a.**

|                                             |                                                                     |
|---------------------------------------------|---------------------------------------------------------------------|
| Identification code                         | p-1_a                                                               |
| Empirical formula                           | C <sub>28</sub> NO <sub>11</sub> F <sub>55</sub> Al <sub>2</sub> Fe |
| Formula weight                              | 1681.10                                                             |
| Temperature/K                               | 100.01                                                              |
| Crystal system                              | triclinic                                                           |
| Space group                                 | P-1                                                                 |
| a/Å                                         | 10.296(5)                                                           |
| b/Å                                         | 22.904(14)                                                          |
| c/Å                                         | 23.622(10)                                                          |
| α/°                                         | 109.683(17)                                                         |
| β/°                                         | 100.670(16)                                                         |
| γ/°                                         | 100.491(7)                                                          |
| Volume/Å <sup>3</sup>                       | 4971(4)                                                             |
| Z                                           | 4                                                                   |
| ρ <sub>calc</sub> /cm <sup>3</sup>          | 2.246                                                               |
| μ/mm <sup>-1</sup>                          | 0.602                                                               |
| F(000)                                      | 3240.0                                                              |
| Crystal size/mm <sup>3</sup>                | 0.2 × 0.15 × 0.1                                                    |
| Radiation                                   | MoKα (λ = 0.71073)                                                  |
| 2θ range for data collection/°              | 1.9 to 55.754                                                       |
| Index ranges                                | -13 ≤ h ≤ 13, -30 ≤ k ≤ 30, -31 ≤ l ≤ 31                            |
| Reflections collected                       | 127020                                                              |
| Independent reflections                     | 23725 [R <sub>int</sub> = 0.0400, R <sub>sigma</sub> = 0.0334]      |
| Data/restraints/parameters                  | 23725/32297/2361                                                    |
| Goodness-of-fit on F <sup>2</sup>           | 1.063                                                               |
| Final R indexes [I ≥ 2σ (I)]                | R <sub>1</sub> = 0.0461, wR <sub>2</sub> = 0.1046                   |
| Final R indexes [all data]                  | R <sub>1</sub> = 0.0685, wR <sub>2</sub> = 0.1161                   |
| Largest diff. peak/hole / e Å <sup>-3</sup> | 1.52/-0.67                                                          |



**Table 2 Fractional Atomic Coordinates ( $\times 10^4$ ) and Equivalent Isotropic Displacement Parameters ( $\text{\AA}^2 \times 10^3$ ) for p-1\_a.  $U_{eq}$  is defined as 1/3 of the trace of the orthogonalised  $U_{ij}$  tensor.**

| Atom  | x           | y           | z           | U(eq)      |
|-------|-------------|-------------|-------------|------------|
| Fe1   | -2742.0 (5) | 7843.5 (2)  | 1590.4 (2)  | 32.96 (11) |
| N1    | -4090 (3)   | 7247.2 (14) | 948.8 (14)  | 39.0 (7)   |
| F1    | 365.5 (15)  | 5221.9 (7)  | 2574.4 (6)  | 16.4 (3)   |
| Al1   | 276.3 (7)   | 5180.3 (3)  | 3297.6 (3)  | 11.37 (14) |
| O1    | -1466 (3)   | 9136.5 (11) | 1650.2 (12) | 41.9 (6)   |
| C1    | -1955 (3)   | 8648.7 (14) | 1627.9 (14) | 26.5 (6)   |
| O3    | -4923 (3)   | 6855.1 (13) | 553.3 (12)  | 48.1 (7)   |
| F3    | 5000        | 10000       | 10000       | 17.4 (4)   |
| Al3   | 5639.6 (7)  | 9645.3 (3)  | 5516.4 (3)  | 11.02 (14) |
| Fe2   | 2888.3 (5)  | 2513.6 (2)  | 3493.0 (2)  | 29.70 (10) |
| N2    | 2544 (3)    | 2848.7 (12) | 2914.7 (13) | 31.4 (6)   |
| F2    | 5000        | 10000       | 5000        | 13.5 (4)   |
| Al2   | 356.2 (7)   | 5282.5 (3)  | 1848.3 (3)  | 11.19 (14) |
| O2    | -4714 (3)   | 8411.0 (12) | 2231.8 (13) | 43.9 (6)   |
| C2    | -3992 (3)   | 8191.3 (15) | 1984.6 (16) | 32.1 (7)   |
| O4    | -660 (3)    | 7380.1 (13) | 954.2 (14)  | 51.1 (7)   |
| Al4   | 5944.9 (7)  | 10818.4 (3) | 10318.6 (3) | 11.73 (14) |
| C4    | -1437 (3)   | 7545.9 (16) | 1197.5 (17) | 35.9 (7)   |
| O5    | -1806 (3)   | 7499.0 (12) | 2655.3 (12) | 45.9 (6)   |
| C5    | -2129 (3)   | 7632.0 (14) | 2246.4 (14) | 27.1 (6)   |
| O6    | 2915 (2)    | 3672.0 (10) | 4567.3 (11) | 35.9 (5)   |
| C6    | 2908 (3)    | 3247.9 (14) | 4152.5 (15) | 27.7 (6)   |
| O7    | 2371 (3)    | 3052.9 (11) | 2541.6 (10) | 37.9 (6)   |
| O8    | 759 (3)     | 1800.2 (14) | 3856.4 (14) | 57.5 (8)   |
| C8    | 1576 (4)    | 2069.0 (16) | 3711.0 (16) | 37.3 (8)   |
| O9    | 2854 (3)    | 1258.4 (11) | 2541.3 (11) | 44.8 (6)   |
| C9    | 2886 (4)    | 1732.4 (16) | 2893.3 (15) | 33.1 (7)   |
| C10   | 4717 (3)    | 2667.9 (13) | 3864.2 (15) | 25.1 (6)   |
| O10   | 5838 (2)    | 2784.9 (11) | 4096.3 (13) | 45.7 (6)   |
| O1_17 | 5890 (40)   | 8929 (12)   | 5112 (15)   | 21 (9)     |
| C1_17 | 6193 (17)   | 8512 (8)    | 4627 (8)    | 21 (4)     |
| C2_17 | 6765 (16)   | 8020 (7)    | 4847 (8)    | 24 (4)     |
| F1_17 | 8056 (15)   | 8294 (9)    | 5189 (9)    | 42.9 (6)   |
| F2_17 | 6760 (20)   | 7510 (10)   | 4364 (10)   | 40 (6)     |
| F3_17 | 6070 (30)   | 7837 (19)   | 5203 (17)   | 37 (8)     |
| C3_17 | 4878 (16)   | 8155 (9)    | 4083 (8)    | 26 (4)     |
| F4_17 | 4180 (40)   | 8569 (16)   | 4010 (20)   | 35 (8)     |
| F5_17 | 4100 (20)   | 7706 (11)   | 4201 (12)   | 32 (5)     |
| F6_17 | 5170 (30)   | 7871 (10)   | 3548 (9)    | 44 (6)     |
| C4_17 | 7270 (20)   | 8871 (9)    | 4391 (10)   | 36 (5)     |
| F7_17 | 6670 (20)   | 9175 (9)    | 4072 (9)    | 44 (5)     |
| F8_17 | 7770 (40)   | 8462 (18)   | 3996 (16)   | 36 (8)     |
| F9_17 | 8280 (30)   | 9288 (15)   | 4872 (14)   | 29 (7)     |
| O1_16 | -1000 (30)  | 4503 (11)   | 3063 (15)   | 19.8 (6)   |
| C1_16 | -1521 (14)  | 3995 (7)    | 3196 (6)    | 22 (3)     |
| C2_16 | -2906 (12)  | 3624 (6)    | 2696 (6)    | 35 (3)     |
| F1_16 | -2650 (20)  | 3315 (12)   | 2162 (7)    | 49 (5)     |
| F2_16 | -3650 (20)  | 3206 (8)    | 2867 (10)   | 43 (5)     |
| F3_16 | -3630 (30)  | 4025 (13)   | 2616 (16)   | 43 (7)     |
| C3_16 | -1757 (14)  | 4219 (6)    | 3856 (6)    | 31 (3)     |
| F4_16 | -660 (30)   | 4664 (16)   | 4268 (15)   | 37.0 (6)   |
| F5_16 | -2833 (15)  | 4463 (8)    | 3869 (7)    | 49 (4)     |
| F6_16 | -2010 (30)  | 3727 (12)   | 4032 (15)   | 49 (6)     |
| C4_16 | -534 (12)   | 3553 (6)    | 3163 (6)    | 32 (3)     |
| F7_16 | 484 (15)    | 3804 (9)    | 3679 (6)    | 37 (4)     |
| F8_16 | -1168 (15)  | 2966 (6)    | 3106 (7)    | 42 (3)     |
| F9_16 | -50 (30)    | 3481 (11)   | 2668 (10)   | 30 (6)     |
| O1_15 | -20 (30)    | 5889 (10)   | 3707 (13)   | 18.3 (10)  |
| C1_15 | -808 (12)   | 6309 (6)    | 3831 (5)    | 17 (3)     |
| C2_15 | -1344 (9)   | 6288 (4)    | 4395 (4)    | 29 (2)     |
| F1_15 | -360 (20)   | 6295 (12)   | 4845 (10)   | 47 (5)     |
| F2_15 | -1863 (11)  | 6784 (5)    | 4622 (6)    | 36 (3)     |
| F3_15 | -2343 (9)   | 5756 (4)    | 4222 (5)    | 50 (2)     |

|       |              |             |             |           |
|-------|--------------|-------------|-------------|-----------|
| C3_15 | -2025 (11)   | 6122 (5)    | 3248 (5)    | 37 (3)    |
| F4_15 | -1539 (11)   | 6290 (5)    | 2821 (3)    | 62 (3)    |
| F5_15 | -2611 (15)   | 5495 (6)    | 3043 (8)    | 50 (4)    |
| F6_15 | -2960 (30)   | 6433 (14)   | 3385 (15)   | 45 (5)    |
| C4_15 | 112 (11)     | 6988 (5)    | 3992 (5)    | 35 (3)    |
| F7_15 | 874 (11)     | 6942 (5)    | 3591 (5)    | 48 (3)    |
| F8_15 | -509 (19)    | 7442 (8)    | 3993 (11)   | 53 (5)    |
| F9_15 | 945 (8)      | 7206 (3)    | 4569 (4)    | 55 (2)    |
| O1_14 | 7090 (20)    | 10200 (13)  | 6032 (11)   | 13.7 (7)  |
| C1_14 | 8132 (15)    | 10399 (6)   | 6558 (7)    | 16 (3)    |
| C2_14 | 7968 (12)    | 9881 (6)    | 6848 (6)    | 24 (3)    |
| F1_14 | 7710 (40)    | 9301 (9)    | 6403 (12)   | 42 (8)    |
| F2_14 | 9137 (15)    | 9971 (11)   | 7265 (7)    | 30 (4)    |
| F3_14 | 7001 (10)    | 9926 (6)    | 7146 (5)    | 31 (3)    |
| C3_14 | 8065 (14)    | 11051 (5)   | 7021 (6)    | 22 (3)    |
| F4_14 | 8519 (10)    | 11522 (4)   | 6838 (5)    | 26 (2)    |
| F5_14 | 6790 (20)    | 11022 (14)  | 7061 (17)   | 31 (5)    |
| F6_14 | 8890 (40)    | 11213 (15)  | 7589 (10)   | 31 (5)    |
| C4_14 | 9521 (12)    | 10485 (6)   | 6391 (6)    | 25 (3)    |
| F7_14 | 9510 (30)    | 10795 (11)  | 6002 (10)   | 29 (4)    |
| F8_14 | 10590 (20)   | 10826 (11)  | 6888 (10)   | 27 (5)    |
| F9_14 | 9756 (11)    | 9917 (5)    | 6120 (5)    | 31 (3)    |
| O1_13 | 4560 (20)    | 9607 (11)   | 5979 (10)   | 15.7 (10) |
| C1_13 | 3476 (10)    | 9251 (4)    | 6071 (4)    | 14.9 (8)  |
| C2_13 | 2726 (7)     | 9724 (4)    | 6436 (3)    | 23.8 (14) |
| F1_13 | 1983 (4)     | 9920 (2)    | 6046 (2)    | 37.3 (13) |
| F2_13 | 1868 (15)    | 9438 (6)    | 6684 (8)    | 32 (3)    |
| F3_13 | 3607 (8)     | 10231 (4)   | 6884 (4)    | 31.8 (18) |
| C3_13 | 4008 (6)     | 8890 (3)    | 6481 (3)    | 23.1 (13) |
| F4_13 | 4975 (15)    | 8632 (11)   | 6265 (9)    | 32 (3)    |
| F5_13 | 4563 (5)     | 9287 (2)    | 7070.0 (19) | 33.9 (11) |
| F6_13 | 3015 (6)     | 8416 (3)    | 6464 (3)    | 31.0 (13) |
| C4_13 | 2492 (7)     | 8759 (3)    | 5443 (3)    | 28.6 (15) |
| F7_13 | 2988 (6)     | 8250 (3)    | 5217 (3)    | 39.0 (14) |
| F8_13 | 1253 (10)    | 8545 (8)    | 5505 (6)    | 39 (3)    |
| F9_13 | 2342 (17)    | 9029 (7)    | 5026 (5)    | 41 (2)    |
| O1_12 | 1574.5 (18)  | 5991.3 (9)  | 2079.5 (9)  | 20.1 (4)  |
| C1_12 | 2236 (3)     | 6454.7 (12) | 1919.0 (12) | 17.5 (5)  |
| C2_12 | 1815 (3)     | 6282.9 (13) | 1205.0 (13) | 26.3 (6)  |
| F1_12 | 1710 (2)     | 5664.9 (8)  | 903.6 (8)   | 37.0 (4)  |
| F2_12 | 2695 (2)     | 6629.4 (9)  | 1020.0 (9)  | 42.6 (5)  |
| F3_12 | 585 (2)      | 6372.1 (9)  | 1025.7 (9)  | 41.6 (5)  |
| C3_12 | 1895 (3)     | 7097.9 (13) | 2250.8 (14) | 26.4 (6)  |
| F4_12 | 2465 (2)     | 7332.0 (9)  | 2858.0 (8)  | 38.3 (5)  |
| F5_12 | 546.7 (19)   | 7005.9 (9)  | 2165.8 (10) | 39.9 (5)  |
| F6_12 | 2324 (2)     | 7546.3 (8)  | 2033.9 (10) | 41.0 (5)  |
| C4_12 | 3797 (3)     | 6528.1 (14) | 2131.2 (14) | 25.4 (6)  |
| F7_12 | 4165.2 (18)  | 6556.8 (10) | 2708.8 (9)  | 39.3 (5)  |
| F8_12 | 4559.5 (18)  | 7069.7 (8)  | 2125.7 (9)  | 34.4 (4)  |
| F9_12 | 4145.1 (19)  | 6042.3 (9)  | 1760.2 (10) | 42.7 (5)  |
| O1_11 | -1229.8 (18) | 5361.6 (9)  | 1582.9 (8)  | 20.0 (4)  |
| C1_11 | -2451 (2)    | 5090.5 (12) | 1147.5 (11) | 16.6 (5)  |
| C2_11 | -3412 (3)    | 4630.4 (14) | 1337.8 (13) | 25.4 (6)  |
| F1_11 | -2710.5 (19) | 4288.9 (9)  | 1566.6 (9)  | 38.6 (4)  |
| F2_11 | -4451.3 (17) | 4220.6 (9)  | 860.1 (9)   | 35.0 (4)  |
| F3_11 | -3952.4 (18) | 4956.9 (9)  | 1776.5 (8)  | 34.7 (4)  |
| C3_11 | -3092 (3)    | 5642.9 (14) | 1104.3 (14) | 26.3 (6)  |
| F4_11 | -2456 (2)    | 5956.3 (10) | 803.3 (11)  | 44.4 (5)  |
| F5_11 | -2943.1 (18) | 6077.3 (8)  | 1671.6 (9)  | 36.0 (4)  |
| F6_11 | -4415.2 (17) | 5437.0 (9)  | 811.7 (8)   | 33.8 (4)  |
| C4_11 | -2266 (3)    | 4706.5 (14) | 497.4 (12)  | 23.2 (6)  |
| F7_11 | -1137.4 (17) | 5009.9 (9)  | 413.9 (8)   | 31.7 (4)  |
| F8_11 | -3326.6 (18) | 4624.4 (10) | 32.4 (8)    | 37.8 (5)  |
| F9_11 | -2140.6 (17) | 4124.2 (8)  | 452.1 (8)   | 30.3 (4)  |
| O1_10 | 639.7 (18)   | 4599.4 (8)  | 1381.9 (8)  | 18.2 (4)  |
| C1_10 | 1346 (2)     | 4145.4 (12) | 1275.2 (11) | 15.5 (5)  |

|       |             |             |             |           |
|-------|-------------|-------------|-------------|-----------|
| C2_10 | 2511 (3)    | 4296.9 (13) | 1867.2 (12) | 20.9 (5)  |
| F1_10 | 3148.6 (17) | 4918.9 (8)  | 2118.1 (8)  | 30.1 (4)  |
| F2_10 | 3432.5 (17) | 3965.9 (9)  | 1757.9 (9)  | 31.8 (4)  |
| F3_10 | 1977.0 (18) | 4160.7 (8)  | 2298.6 (8)  | 28.3 (4)  |
| C3_10 | 347 (3)     | 3477.8 (13) | 1102.1 (13) | 25.0 (6)  |
| F4_10 | -400.2 (19) | 3249.5 (8)  | 510.5 (8)   | 36.2 (4)  |
| F5_10 | -518.3 (18) | 3523.0 (9)  | 1454.2 (9)  | 36.2 (4)  |
| F6_10 | 1012 (2)    | 3049.0 (8)  | 1177.6 (10) | 38.3 (4)  |
| C4_10 | 1971 (3)    | 4140.3 (13) | 725.0 (12)  | 21.9 (5)  |
| F7_10 | 1059.6 (18) | 4164.5 (9)  | 263.3 (8)   | 31.9 (4)  |
| F8_10 | 2399.2 (19) | 3609.0 (9)  | 498.1 (8)   | 34.3 (4)  |
| F9_10 | 3041.0 (17) | 4644.5 (8)  | 906.8 (8)   | 28.9 (4)  |
| O1_9  | -1050 (7)   | 4517 (3)    | 3090 (4)    | 19.8 (6)  |
| C1_9  | -1618 (4)   | 3989 (2)    | 3189.4 (18) | 14.8 (8)  |
| C2_9  | -942 (4)    | 4031.4 (16) | 3852.8 (15) | 21.8 (7)  |
| F1_9  | 263 (3)     | 3890 (2)    | 3878.6 (16) | 33.0 (9)  |
| F2_9  | -1720 (6)   | 3629 (3)    | 4026 (3)    | 26.8 (8)  |
| F3_9  | -719 (7)    | 4627 (4)    | 4264 (4)    | 37.0 (6)  |
| C3_9  | -3175 (3)   | 3929.4 (17) | 3111.8 (17) | 24.7 (8)  |
| F4_9  | -3708 (8)   | 4062 (4)    | 2632 (4)    | 43.0 (18) |
| F5_9  | -3375 (3)   | 4338.6 (16) | 3621.6 (17) | 38.7 (8)  |
| F6_9  | -3888 (5)   | 3342.4 (19) | 3025 (2)    | 33.4 (9)  |
| C4_9  | -1422 (3)   | 3380.9 (16) | 2702.9 (16) | 24.2 (8)  |
| F7_9  | -2240 (5)   | 3237 (3)    | 2144.5 (17) | 35.2 (10) |
| F8_9  | -1691 (4)   | 2869.3 (13) | 2857.7 (15) | 32.9 (7)  |
| F9_9  | -127 (7)    | 3487 (3)    | 2667 (3)    | 39.1 (17) |
| O1_8  | 1805.2 (17) | 5065.6 (8)  | 3604.1 (8)  | 15.3 (3)  |
| C1_8  | 3040 (2)    | 5367.1 (11) | 4034.8 (11) | 15.3 (5)  |
| C2_8  | 3628 (3)    | 6049.8 (13) | 4059.6 (13) | 23.3 (6)  |
| F1_8  | 3316 (2)    | 6061.0 (9)  | 3494.4 (8)  | 36.4 (4)  |
| F2_8  | 4982.2 (17) | 6258.6 (8)  | 4293.6 (9)  | 32.3 (4)  |
| F3_8  | 3090.6 (18) | 6477.2 (8)  | 4416.5 (8)  | 30.9 (4)  |
| C3_8  | 2877 (3)    | 5423.6 (13) | 4690.2 (12) | 19.6 (5)  |
| F4_8  | 2696.6 (17) | 4858.3 (8)  | 4746.0 (7)  | 25.4 (3)  |
| F5_8  | 1791.0 (17) | 5636.4 (8)  | 4788.4 (7)  | 26.7 (4)  |
| F6_8  | 3976.5 (17) | 5830.1 (8)  | 5149.9 (7)  | 26.5 (4)  |
| C4_8  | 4038 (3)    | 4947.9 (13) | 3852.9 (12) | 20.9 (5)  |
| F7_8  | 3426.7 (17) | 4326.1 (7)  | 3679.9 (8)  | 26.9 (4)  |
| F8_8  | 5142.9 (16) | 5104.3 (8)  | 4319.8 (7)  | 26.0 (4)  |
| F9_8  | 4439.9 (17) | 5016.5 (9)  | 3367.0 (8)  | 28.7 (4)  |
| O1_7  | 157 (10)    | 5908 (4)    | 3766 (5)    | 18.3 (10) |
| C1_7  | -573 (6)    | 6347 (3)    | 3886 (2)    | 16.2 (11) |
| C2_7  | -2115 (5)   | 6038 (2)    | 3531 (2)    | 34.2 (11) |
| F1_7  | -2200 (6)   | 5636 (3)    | 2952 (3)    | 54.4 (16) |
| F2_7  | -2790 (12)  | 6464 (6)    | 3481 (6)    | 50 (2)    |
| F3_7  | -2715 (3)   | 5706.4 (16) | 3816 (2)    | 55.1 (11) |
| C3_7  | -418 (4)    | 6631 (2)    | 4595.0 (19) | 25.2 (9)  |
| F4_7  | 835 (3)     | 7008.9 (15) | 4903.9 (14) | 44.3 (8)  |
| F5_7  | -611 (9)    | 6162 (5)    | 4809 (4)    | 40.6 (16) |
| F6_7  | -1307 (5)   | 6972 (2)    | 4745 (3)    | 39.5 (12) |
| C4_7  | 6 (6)       | 6897 (3)    | 3682 (3)    | 34.4 (12) |
| F7_7  | 1364 (4)    | 7093 (2)    | 3882 (2)    | 47.2 (11) |
| F8_7  | -499 (10)   | 7396 (4)    | 3896 (4)    | 50.2 (19) |
| F9_7  | -358 (4)    | 6690 (2)    | 3062.6 (16) | 59.1 (12) |
| O1_6  | 5812 (5)    | 8919.7 (16) | 5071 (2)    | 15.5 (10) |
| C1_6  | 6096 (3)    | 8535.7 (15) | 4556.0 (16) | 14.4 (6)  |
| C2_6  | 5213 (3)    | 8562.2 (14) | 3964.1 (14) | 21.9 (6)  |
| F1_6  | 3925 (5)    | 8518 (2)    | 3994 (3)    | 32.5 (9)  |
| F2_6  | 5208 (3)    | 8093.5 (12) | 3438.9 (11) | 31.2 (6)  |
| F3_6  | 5685 (3)    | 9119.8 (9)  | 3915.3 (9)  | 32.5 (5)  |
| C3_6  | 7639 (3)    | 8749.2 (16) | 4587.5 (16) | 26.2 (7)  |
| F4_6  | 8396 (2)    | 8566.8 (12) | 4980.9 (11) | 42.9 (6)  |
| F5_6  | 8050 (4)    | 9388.8 (19) | 4791 (2)    | 33.3 (10) |
| F6_6  | 7893 (5)    | 8504 (2)    | 4039 (2)    | 44.3 (14) |
| C4_6  | 5745 (3)    | 7834.2 (14) | 4524.3 (15) | 23.1 (7)  |
| F7_6  | 6190 (5)    | 7818 (2)    | 5084 (2)    | 36.7 (9)  |

|      |             |              |              |           |
|------|-------------|--------------|--------------|-----------|
| F8_6 | 6305 (3)    | 7459.7 (12)  | 4133.5 (13)  | 33.2 (7)  |
| F9_6 | 4405 (3)    | 7578.6 (14)  | 4332.3 (18)  | 36.2 (8)  |
| O1_5 | 4460 (15)   | 9552 (8)     | 5925 (8)     | 15.7 (10) |
| C1_5 | 3338 (8)    | 9171 (3)     | 5967 (3)     | 14.9 (8)  |
| C2_5 | 3044 (5)    | 9524 (3)     | 6599 (2)     | 24.2 (11) |
| F1_5 | 3951 (4)    | 9499.6 (19)  | 7068.5 (15)  | 33.7 (9)  |
| F2_5 | 1795 (11)   | 9261 (4)     | 6623 (6)     | 25.9 (17) |
| F3_5 | 3145 (7)    | 10140 (3)    | 6709 (4)     | 34.7 (15) |
| C3_5 | 2090 (5)    | 9041 (3)     | 5416 (3)     | 23.2 (11) |
| F4_5 | 2479 (13)   | 8907 (5)     | 4888 (4)     | 33.1 (16) |
| F5_5 | 1612 (3)    | 9559.8 (18)  | 5506.9 (19)  | 37.4 (10) |
| F6_5 | 1069 (8)    | 8550 (5)     | 5343 (4)     | 30.6 (16) |
| C4_5 | 3584 (5)    | 8516 (2)     | 5948 (2)     | 20.0 (10) |
| F7_5 | 3478 (4)    | 8125.7 (19)  | 5375.1 (19)  | 27.5 (9)  |
| F8_5 | 2712 (5)    | 8214 (2)     | 6174 (2)     | 25.9 (9)  |
| F9_5 | 4854 (11)   | 8609 (8)     | 6297 (6)     | 29 (2)    |
| O1_4 | 7119 (5)    | 10222 (3)    | 5967 (2)     | 13.7 (7)  |
| C1_4 | 8165 (4)    | 10402.2 (19) | 6488 (2)     | 15.0 (8)  |
| C2_4 | 8644 (3)    | 9813.9 (16)  | 6545.2 (16)  | 23.4 (8)  |
| F1_4 | 7543 (8)    | 9322 (2)     | 6419 (3)     | 31.9 (11) |
| F2_4 | 9429 (4)    | 9934 (3)     | 7108.6 (16)  | 31.8 (9)  |
| F3_4 | 9340 (3)    | 9604.8 (14)  | 6134.2 (12)  | 34.0 (6)  |
| C3_4 | 9368 (4)    | 10874.3 (18) | 6429.6 (18)  | 26.8 (8)  |
| F4_4 | 9126 (3)    | 11446.6 (11) | 6537.0 (13)  | 43.5 (8)  |
| F5_4 | 9553 (8)    | 10651 (3)    | 5862 (2)     | 33.9 (12) |
| F6_4 | 10556 (6)   | 10964 (3)    | 6840 (3)     | 36.5 (14) |
| C4_4 | 7722 (4)    | 10738 (2)    | 7083.6 (16)  | 29.2 (9)  |
| F7_4 | 6993 (5)    | 11137 (3)    | 6998 (4)     | 43.1 (13) |
| F8_4 | 8801 (9)    | 11080 (4)    | 7578 (2)     | 37.6 (15) |
| F9_4 | 6959 (3)    | 10307.4 (19) | 7230.8 (12)  | 43.7 (8)  |
| O1_3 | 6746 (2)    | 10942.3 (10) | 9789.7 (8)   | 27.3 (5)  |
| C1_3 | 6858 (3)    | 10883.4 (12) | 9213.1 (12)  | 18.7 (5)  |
| C2_3 | 7307 (4)    | 11563.3 (15) | 9199.0 (14)  | 34.1 (7)  |
| F1_3 | 6248 (3)    | 11820.1 (10) | 9158.3 (11)  | 53.8 (6)  |
| F2_3 | 7805 (2)    | 11540.0 (10) | 8710.7 (9)   | 49.4 (6)  |
| F3_3 | 8281 (2)    | 11946.1 (9)  | 9709.2 (9)   | 46.2 (5)  |
| C3_3 | 7944 (3)    | 10511.8 (15) | 9060.6 (14)  | 29.8 (6)  |
| F4_3 | 7772 (2)    | 10010.8 (9)  | 9229.2 (9)   | 42.3 (5)  |
| F5_3 | 9207.0 (18) | 10893.9 (10) | 9374.8 (9)   | 40.7 (5)  |
| F6_3 | 7865 (2)    | 10287.6 (11) | 8452.4 (8)   | 44.5 (5)  |
| C4_3 | 5455 (3)    | 10507.8 (15) | 8717.5 (13)  | 28.8 (6)  |
| F7_3 | 5210 (2)    | 9884.5 (9)   | 8613.5 (9)   | 38.9 (4)  |
| F8_3 | 5424 (2)    | 10580.2 (9)  | 8179.1 (8)   | 36.5 (4)  |
| F9_3 | 4456.4 (19) | 10722.6 (11) | 8928.5 (10)  | 48.7 (6)  |
| O1_2 | 4653.5 (19) | 11183.9 (9)  | 10427.7 (9)  | 21.1 (4)  |
| C1_2 | 4328 (3)    | 11733.9 (12) | 10717.8 (12) | 18.7 (5)  |
| C2_2 | 4366 (3)    | 11817.9 (14) | 11402.1 (14) | 30.8 (7)  |
| F1_2 | 3773 (3)    | 11269.2 (10) | 11426.4 (10) | 59.2 (7)  |
| F2_2 | 3721 (2)    | 12248.6 (11) | 11666.9 (10) | 53.0 (6)  |
| F3_2 | 5646 (2)    | 12011.5 (9)  | 11753.9 (8)  | 35.8 (4)  |
| C3_2 | 5361 (3)    | 12327.5 (14) | 10724.7 (14) | 30.5 (7)  |
| F4_2 | 5105 (3)    | 12353.4 (10) | 10158.9 (10) | 54.1 (6)  |
| F5_2 | 6630.5 (19) | 12266.7 (9)  | 10858.9 (9)  | 39.4 (5)  |
| F6_2 | 5307 (2)    | 12874.8 (8)  | 11132.1 (10) | 45.0 (5)  |
| C4_2 | 2864 (3)    | 11684.1 (15) | 10358.4 (15) | 35.3 (7)  |
| F7_2 | 2730 (2)    | 11477.2 (9)  | 9748.4 (9)   | 42.8 (5)  |
| F8_2 | 2566 (2)    | 12249.3 (11) | 10533.6 (12) | 66.4 (8)  |
| F9_2 | 1937.4 (19) | 11270.9 (11) | 10452.5 (11) | 52.7 (6)  |
| O1_1 | 7066.6 (18) | 10927.9 (9)  | 10998.1 (8)  | 17.5 (4)  |
| C1_1 | 8357 (2)    | 10996.9 (12) | 11323.4 (11) | 16.6 (5)  |
| C2_1 | 8927 (3)    | 10430.0 (13) | 10988.4 (13) | 23.3 (6)  |
| F1_1 | 7945.0 (19) | 9880.7 (8)   | 10751.4 (9)  | 35.5 (4)  |
| F2_1 | 9953.5 (19) | 10360.8 (10) | 11370.9 (9)  | 38.4 (4)  |
| F3_1 | 9364.2 (18) | 10508.2 (9)  | 10518.8 (8)  | 30.4 (4)  |
| C3_1 | 9324 (3)    | 11638.9 (13) | 11400.8 (13) | 25.0 (6)  |
| F4_1 | 9088 (2)    | 12134.2 (8)  | 11817.2 (9)  | 41.7 (5)  |

|      |              |              |              |          |
|------|--------------|--------------|--------------|----------|
| F5_1 | 9158.6 (18)  | 11721.9 (8)  | 10868.3 (8)  | 32.1 (4) |
| F6_1 | 10652.2 (17) | 11659.6 (9)  | 11598.8 (9)  | 35.9 (4) |
| C4_1 | 8286 (3)     | 11002.0 (14) | 11976.4 (13) | 24.5 (6) |
| F7_1 | 7501.1 (19)  | 11357.5 (9)  | 12212.4 (8)  | 34.7 (4) |
| F8_1 | 9536.3 (18)  | 11230.8 (10) | 12386.9 (8)  | 37.8 (4) |
| F9_1 | 7787.3 (18)  | 10409.4 (9)  | 11944.4 (8)  | 31.6 (4) |

**Table 3 Bond Lengths for p-1\_a.**

| Atom  | Atom             | Length/Å    | Atom  | Atom  | Length/Å    |
|-------|------------------|-------------|-------|-------|-------------|
| Fe1   | N1               | 1.796 (3)   | C2_11 | F1_11 | 1.331 (3)   |
| Fe1   | C1               | 1.840 (3)   | C2_11 | F2_11 | 1.331 (3)   |
| Fe1   | C2               | 1.864 (4)   | C2_11 | F3_11 | 1.336 (3)   |
| Fe1   | C4               | 1.871 (4)   | C3_11 | F4_11 | 1.340 (3)   |
| Fe1   | C5               | 1.814 (3)   | C3_11 | F5_11 | 1.334 (3)   |
| N1    | O3               | 1.128 (4)   | C3_11 | F6_11 | 1.324 (3)   |
| F1    | Al1              | 1.7608 (17) | C4_11 | F7_11 | 1.325 (3)   |
| F1    | Al2              | 1.7654 (17) | C4_11 | F8_11 | 1.333 (3)   |
| O1    | C1               | 1.118 (4)   | C4_11 | F9_11 | 1.334 (3)   |
| F3    | Al4 <sup>1</sup> | 1.7722 (12) | O1_10 | Al2   | 1.694 (2)   |
| F3    | Al4              | 1.7722 (12) | O1_10 | C1_10 | 1.357 (3)   |
| Al3   | F2               | 1.7739 (9)  | C1_10 | C2_10 | 1.554 (4)   |
| Fe2   | N2               | 1.791 (3)   | C1_10 | C3_10 | 1.554 (4)   |
| Fe2   | C6               | 1.862 (3)   | C1_10 | C4_10 | 1.551 (3)   |
| Fe2   | C8               | 1.799 (4)   | C2_10 | F1_10 | 1.326 (3)   |
| Fe2   | C9               | 1.870 (3)   | C2_10 | F2_10 | 1.328 (3)   |
| Fe2   | C10              | 1.838 (3)   | C2_10 | F3_10 | 1.341 (3)   |
| N2    | O7               | 1.130 (3)   | C3_10 | F4_10 | 1.335 (3)   |
| O2    | C2               | 1.117 (4)   | C3_10 | F5_10 | 1.322 (3)   |
| O4    | C4               | 1.118 (4)   | C3_10 | F6_10 | 1.335 (3)   |
| O5    | C5               | 1.119 (4)   | C4_10 | F7_10 | 1.324 (3)   |
| O6    | C6               | 1.121 (4)   | C4_10 | F8_10 | 1.344 (3)   |
| O8    | C8               | 1.125 (4)   | C4_10 | F9_10 | 1.326 (3)   |
| O9    | C9               | 1.114 (4)   | O1_9  | Al1   | 1.706 (4)   |
| C10   | O10              | 1.121 (4)   | O1_9  | C1_9  | 1.358 (4)   |
| O1_17 | Al3              | 1.694 (14)  | C1_9  | C2_9  | 1.555 (5)   |
| O1_17 | C1_17            | 1.349 (13)  | C1_9  | C3_9  | 1.554 (5)   |
| C1_17 | C2_17            | 1.552 (12)  | C1_9  | C4_9  | 1.552 (5)   |
| C1_17 | C3_17            | 1.549 (12)  | C2_9  | F1_9  | 1.335 (5)   |
| C1_17 | C4_17            | 1.553 (13)  | C2_9  | F2_9  | 1.329 (5)   |
| C2_17 | F1_17            | 1.330 (13)  | C2_9  | F3_9  | 1.330 (7)   |
| C2_17 | F2_17            | 1.329 (13)  | C3_9  | F4_9  | 1.318 (7)   |
| C2_17 | F3_17            | 1.323 (13)  | C3_9  | F5_9  | 1.332 (5)   |
| C3_17 | F4_17            | 1.329 (13)  | C3_9  | F6_9  | 1.338 (5)   |
| C3_17 | F5_17            | 1.327 (13)  | C4_9  | F7_9  | 1.324 (5)   |
| C3_17 | F6_17            | 1.331 (13)  | C4_9  | F8_9  | 1.338 (4)   |
| C4_17 | F7_17            | 1.332 (13)  | C4_9  | F9_9  | 1.335 (6)   |
| C4_17 | F8_17            | 1.334 (13)  | O1_8  | Al1   | 1.7111 (19) |
| C4_17 | F9_17            | 1.324 (13)  | O1_8  | C1_8  | 1.363 (3)   |
| O1_16 | Al1              | 1.687 (13)  | C1_8  | C2_8  | 1.548 (4)   |
| O1_16 | C1_16            | 1.350 (13)  | C1_8  | C3_8  | 1.553 (3)   |
| O1_16 | C1_9             | 1.385 (18)  | C1_8  | C4_8  | 1.552 (3)   |
| C1_16 | C2_16            | 1.553 (12)  | C2_8  | F1_8  | 1.324 (3)   |
| C1_16 | C3_16            | 1.550 (12)  | C2_8  | F2_8  | 1.331 (3)   |
| C1_16 | C4_16            | 1.554 (12)  | C2_8  | F3_8  | 1.338 (3)   |
| C1_16 | O1_9             | 1.326 (19)  | C3_8  | F4_8  | 1.328 (3)   |
| C1_16 | C2_9             | 1.524 (15)  | C3_8  | F5_8  | 1.326 (3)   |
| C1_16 | C3_9             | 1.650 (14)  | C3_8  | F6_8  | 1.345 (3)   |
| C1_16 | C4_9             | 1.529 (14)  | C4_8  | F7_8  | 1.334 (3)   |
| C2_16 | F1_16            | 1.322 (12)  | C4_8  | F8_8  | 1.326 (3)   |
| C2_16 | F2_16            | 1.334 (12)  | C4_8  | F9_8  | 1.336 (3)   |
| C2_16 | F3_16            | 1.325 (13)  | O1_7  | Al1   | 1.702 (5)   |
| C2_16 | C1_9             | 1.478 (13)  | O1_7  | C1_7  | 1.349 (6)   |
| C2_16 | C3_9             | 1.113 (14)  | C1_7  | C2_7  | 1.557 (6)   |
| C2_16 | F4_9             | 1.438 (17)  | C1_7  | C3_7  | 1.543 (6)   |
| C2_16 | F6_9             | 1.560 (13)  | C1_7  | C4_7  | 1.556 (7)   |
| C2_16 | C4_9             | 1.718 (14)  | C2_7  | F1_7  | 1.343 (7)   |

|             |            |           |            |
|-------------|------------|-----------|------------|
| C2_16F7_9   | 1.652 (15) | C2_7 F2_7 | 1.321 (8)  |
| F1_16 C4_9  | 1.57 (2)   | C2_7 F3_7 | 1.317 (7)  |
| F2_16 C3_9  | 1.508 (17) | C3_7 F4_7 | 1.328 (5)  |
| F2_16 F6_9  | 0.527 (18) | C3_7 F5_7 | 1.332 (8)  |
| F3_16 C3_9  | 1.28 (3)   | C3_7 F6_7 | 1.331 (5)  |
| C3_16F4_16  | 1.328 (13) | C4_7 F7_7 | 1.328 (6)  |
| C3_16F5_16  | 1.328 (12) | C4_7 F8_7 | 1.325 (7)  |
| C3_16F6_16  | 1.328 (13) | C4_7 F9_7 | 1.330 (6)  |
| C3_16C1_9   | 1.527 (14) | O1_6 A13  | 1.703 (3)  |
| C3_16C2_9   | 1.010 (13) | O1_6 C1_6 | 1.357 (4)  |
| C3_16F2_9   | 1.539 (15) | C1_6 C2_6 | 1.546 (4)  |
| C3_16F3_9   | 1.262 (16) | C1_6 C3_6 | 1.555 (4)  |
| C3_16C3_9   | 1.890 (14) | C1_6 C4_6 | 1.554 (4)  |
| C3_16F5_9   | 1.756 (14) | C2_6 F1_6 | 1.328 (5)  |
| F4_16 C2_9  | 1.39 (3)   | C2_6 F2_6 | 1.338 (4)  |
| F5_16 C3_9  | 1.718 (16) | C2_6 F3_6 | 1.332 (4)  |
| F5_16 F5_9  | 0.666 (14) | C3_6 F4_6 | 1.326 (4)  |
| F6_16 C2_9  | 1.40 (2)   | C3_6 F5_6 | 1.335 (5)  |
| C4_16F7_16  | 1.323 (12) | C3_6 F6_6 | 1.324 (5)  |
| C4_16F8_16  | 1.333 (11) | C4_6 F7_6 | 1.332 (5)  |
| C4_16F9_16  | 1.327 (12) | C4_6 F8_6 | 1.328 (4)  |
| C4_16C1_9   | 1.623 (14) | C4_6 F9_6 | 1.322 (4)  |
| C4_16C2_9   | 1.803 (13) | O1_5 A13  | 1.713 (8)  |
| C4_16F1_9   | 1.582 (14) | O1_5 C1_5 | 1.355 (8)  |
| C4_16C4_9   | 1.177 (13) | C1_5 C2_5 | 1.555 (8)  |
| C4_16F8_9   | 1.623 (12) | C1_5 C3_5 | 1.554 (8)  |
| C4_16F9_9   | 1.288 (15) | C1_5 C4_5 | 1.554 (8)  |
| F7_16 C2_9  | 1.718 (16) | C2_5 F1_5 | 1.334 (7)  |
| F7_16 F1_9  | 0.553 (15) | C2_5 F2_5 | 1.337 (9)  |
| F8_16 C4_9  | 1.576 (14) | C2_5 F3_5 | 1.328 (8)  |
| F8_16 F8_9  | 0.659 (13) | C3_5 F4_5 | 1.334 (7)  |
| F9_16 C4_9  | 1.41 (2)   | C3_5 F5_5 | 1.333 (6)  |
| O1_15 A11   | 1.702 (12) | C3_5 F6_5 | 1.332 (9)  |
| O1_15 C1_15 | 1.360 (12) | C4_5 F7_5 | 1.318 (6)  |
| C1_15 C2_15 | 1.543 (11) | C4_5 F8_5 | 1.331 (6)  |
| C1_15 C3_15 | 1.556 (11) | C4_5 F9_5 | 1.348 (10) |
| C1_15 C4_15 | 1.548 (11) | O1_4 A13  | 1.708 (4)  |
| C2_15 F1_15 | 1.322 (12) | O1_4 C1_4 | 1.360 (4)  |
| C2_15 F2_15 | 1.335 (10) | C1_4 C2_4 | 1.555 (5)  |
| C2_15 F3_15 | 1.328 (10) | C1_4 C3_4 | 1.549 (5)  |
| C3_15 F4_15 | 1.339 (11) | C1_4 C4_4 | 1.554 (5)  |
| C3_15 F5_15 | 1.331 (11) | C2_4 F1_4 | 1.352 (6)  |
| C3_15 F6_15 | 1.324 (12) | C2_4 F2_4 | 1.332 (4)  |
| C4_15 F7_15 | 1.327 (11) | C2_4 F3_4 | 1.324 (4)  |
| C4_15 F8_15 | 1.315 (12) | C3_4 F4_4 | 1.328 (5)  |
| C4_15 F9_15 | 1.340 (11) | C3_4 F5_4 | 1.327 (5)  |
| O1_14 A13   | 1.708 (13) | C3_4 F6_4 | 1.346 (5)  |
| O1_14 C1_14 | 1.360 (13) | C4_4 F7_4 | 1.325 (6)  |
| C1_14 C2_14 | 1.556 (12) | C4_4 F8_4 | 1.341 (6)  |
| C1_14 C3_14 | 1.550 (12) | C4_4 F9_4 | 1.328 (5)  |
| C1_14 C4_14 | 1.549 (12) | O1_3 A14  | 1.690 (2)  |
| C2_14 F1_14 | 1.330 (13) | O1_3 C1_3 | 1.351 (3)  |
| C2_14 F2_14 | 1.339 (12) | C1_3 C2_3 | 1.555 (4)  |
| C2_14 F3_14 | 1.321 (11) | C1_3 C3_3 | 1.548 (4)  |
| C3_14 F4_14 | 1.333 (11) | C1_3 C4_3 | 1.562 (4)  |
| C3_14 F5_14 | 1.322 (13) | C2_3 F1_3 | 1.333 (4)  |
| C3_14 F6_14 | 1.335 (13) | C2_3 F2_3 | 1.335 (4)  |
| C4_14 F7_14 | 1.337 (13) | C2_3 F3_3 | 1.322 (4)  |
| C4_14 F8_14 | 1.335 (13) | C3_3 F4_3 | 1.329 (4)  |
| C4_14 F9_14 | 1.332 (12) | C3_3 F5_3 | 1.341 (4)  |
| O1_13 A13   | 1.708 (10) | C3_3 F6_3 | 1.334 (3)  |
| O1_13 C1_13 | 1.354 (10) | C4_3 F7_3 | 1.331 (4)  |
| C1_13 C2_13 | 1.562 (9)  | C4_3 F8_3 | 1.332 (3)  |
| C1_13 C3_13 | 1.559 (9)  | C4_3 F9_3 | 1.326 (3)  |
| C1_13 C4_13 | 1.548 (9)  | O1_2 A14  | 1.709 (2)  |
| C2_13 F1_13 | 1.334 (8)  | O1_2 C1_2 | 1.351 (3)  |

|             |            |           |           |
|-------------|------------|-----------|-----------|
| C2_13 F2_13 | 1.337 (10) | C1_2 C2_2 | 1.554 (4) |
| C2_13 F3_13 | 1.313 (9)  | C1_2 C3_2 | 1.560 (4) |
| C3_13 F4_13 | 1.340 (12) | C1_2 C4_2 | 1.550 (4) |
| C3_13 F5_13 | 1.325 (7)  | C2_2 F1_2 | 1.318 (4) |
| C3_13 F6_13 | 1.334 (7)  | C2_2 F2_2 | 1.336 (3) |
| C4_13 F7_13 | 1.344 (9)  | C2_2 F3_2 | 1.325 (4) |
| C4_13 F8_13 | 1.334 (10) | C3_2 F4_2 | 1.337 (4) |
| C4_13 F9_13 | 1.328 (11) | C3_2 F5_2 | 1.331 (4) |
| O1_12 Al2   | 1.707 (2)  | C3_2 F6_2 | 1.317 (3) |
| O1_12 C1_12 | 1.356 (3)  | C4_2 F7_2 | 1.328 (4) |
| C1_12 C2_12 | 1.552 (4)  | C4_2 F8_2 | 1.331 (3) |
| C1_12 C3_12 | 1.556 (4)  | C4_2 F9_2 | 1.322 (4) |
| C1_12 C4_12 | 1.552 (4)  | O1_1 Al4  | 1.706 (2) |
| C2_12 F1_12 | 1.326 (3)  | O1_1 C1_1 | 1.358 (3) |
| C2_12 F2_12 | 1.327 (3)  | C1_1 C2_1 | 1.554 (4) |
| C2_12 F3_12 | 1.334 (4)  | C1_1 C3_1 | 1.551 (4) |
| C3_12 F4_12 | 1.321 (3)  | C1_1 C4_1 | 1.554 (4) |
| C3_12 F5_12 | 1.332 (3)  | C2_1 F1_1 | 1.331 (3) |
| C3_12 F6_12 | 1.336 (3)  | C2_1 F2_1 | 1.328 (3) |
| C4_12 F7_12 | 1.322 (3)  | C2_1 F3_1 | 1.325 (3) |
| C4_12 F8_12 | 1.347 (3)  | C3_1 F4_1 | 1.323 (3) |
| C4_12 F9_12 | 1.319 (3)  | C3_1 F5_1 | 1.319 (3) |
| O1_11 Al2   | 1.702 (2)  | C3_1 F6_1 | 1.348 (3) |
| O1_11 C1_11 | 1.353 (3)  | C4_1 F7_1 | 1.314 (3) |
| C1_11 C2_11 | 1.548 (4)  | C4_1 F8_1 | 1.350 (3) |
| C1_11 C3_11 | 1.554 (4)  | C4_1 F9_1 | 1.332 (3) |
| C1_11 C4_11 | 1.558 (4)  |           |           |

<sup>1</sup>I-X,2-Y,2-Z

**Table 4 Bond Angles for p-1\_a.**

| Atom             | Atom | Atom  | Angle/°     | Atom  | Atom  | Atom  | Angle/°    |
|------------------|------|-------|-------------|-------|-------|-------|------------|
| N1               | Fe1  | C1    | 124.64 (13) | O1_10 | C1_10 | C4_10 | 108.9 (2)  |
| N1               | Fe1  | C2    | 92.03 (15)  | C2_10 | C1_10 | C3_10 | 109.7 (2)  |
| N1               | Fe1  | C4    | 90.04 (15)  | C4_10 | C1_10 | C2_10 | 109.6 (2)  |
| N1               | Fe1  | C5    | 117.18 (13) | C4_10 | C1_10 | C3_10 | 109.5 (2)  |
| C1               | Fe1  | C2    | 88.28 (14)  | F1_10 | C2_10 | C1_10 | 110.3 (2)  |
| C1               | Fe1  | C4    | 88.13 (15)  | F1_10 | C2_10 | F2_10 | 108.6 (2)  |
| C2               | Fe1  | C4    | 176.40 (14) | F1_10 | C2_10 | F3_10 | 106.7 (2)  |
| C5               | Fe1  | C1    | 118.19 (13) | F2_10 | C2_10 | C1_10 | 113.4 (2)  |
| C5               | Fe1  | C2    | 89.37 (14)  | F2_10 | C2_10 | F3_10 | 107.7 (2)  |
| C5               | Fe1  | C4    | 92.30 (15)  | F3_10 | C2_10 | C1_10 | 109.8 (2)  |
| O3               | N1   | Fe1   | 177.4 (3)   | F4_10 | C3_10 | C1_10 | 110.7 (2)  |
| Al1              | F1   | Al2   | 176.18 (10) | F4_10 | C3_10 | F6_10 | 108.4 (2)  |
| O1_16            | Al1  | F1    | 100.7 (11)  | F5_10 | C3_10 | C1_10 | 110.6 (2)  |
| O1_16            | Al1  | O1_15 | 117.9 (17)  | F5_10 | C3_10 | F4_10 | 107.1 (2)  |
| O1_16            | Al1  | O1_9  | 3.1 (17)    | F5_10 | C3_10 | F6_10 | 107.9 (2)  |
| O1_16            | Al1  | O1_8  | 110.5 (12)  | F6_10 | C3_10 | C1_10 | 111.9 (2)  |
| O1_15            | Al1  | F1    | 104.6 (11)  | F7_10 | C4_10 | C1_10 | 110.8 (2)  |
| O1_15            | Al1  | O1_9  | 115.0 (11)  | F7_10 | C4_10 | F8_10 | 108.0 (2)  |
| O1_15            | Al1  | O1_8  | 115.2 (9)   | F7_10 | C4_10 | F9_10 | 107.9 (2)  |
| O1_9             | Al1  | F1    | 102.8 (3)   | F8_10 | C4_10 | C1_10 | 111.8 (2)  |
| O1_9             | Al1  | O1_8  | 111.8 (3)   | F9_10 | C4_10 | C1_10 | 110.6 (2)  |
| O1_8             | Al1  | F1    | 105.96 (9)  | F9_10 | C4_10 | F8_10 | 107.6 (2)  |
| O1_7             | Al1  | F1    | 107.5 (4)   | C1_16 | O1_9  | Al1   | 145.9 (8)  |
| O1_7             | Al1  | O1_8  | 108.6 (3)   | C1_16 | O1_9  | C1_9  | 3.9 (7)    |
| O1               | C1   | Fe1   | 179.3 (3)   | C1_9  | O1_9  | Al1   | 149.0 (5)  |
| Al4 <sup>1</sup> | F3   | Al4   | 180.00 (5)  | O1_16 | C1_9  | C2_16 | 108.8 (14) |
| O1_17            | Al3  | F2    | 110.4 (13)  | O1_16 | C1_9  | C3_16 | 110.4 (15) |
| O1_17            | Al3  | O1_14 | 114.1 (19)  | O1_16 | C1_9  | C4_16 | 104.7 (16) |
| O1_17            | Al3  | O1_13 | 114.4 (16)  | O1_16 | C1_9  | C2_9  | 112.6 (12) |
| O1_14            | Al3  | F2    | 105.9 (10)  | O1_16 | C1_9  | C3_9  | 111.2 (15) |
| O1_13            | Al3  | F2    | 108.7 (10)  | O1_16 | C1_9  | C4_9  | 105.8 (17) |
| O1_13            | Al3  | O1_14 | 102.7 (14)  | C2_16 | C1_9  | C3_16 | 115.6 (8)  |
| O1_6             | Al3  | F2    | 107.17 (18) | C2_16 | C1_9  | C4_16 | 110.2 (8)  |
| O1_6             | Al3  | O1_5  | 110.9 (6)   | C2_16 | C1_9  | C2_9  | 137.3 (6)  |
| O1_6             | Al3  | O1_4  | 116.6 (3)   | C2_16 | C1_9  | C3_9  | 43.0 (6)   |
| O1_5             | Al3  | F2    | 107.4 (8)   | C2_16 | C1_9  | C4_9  | 69.0 (6)   |

|       |       |                  |             |       |      |       |            |
|-------|-------|------------------|-------------|-------|------|-------|------------|
| O1_4  | Al3   | F2               | 100.8 (2)   | C3_16 | C1_9 | C4_16 | 106.5 (7)  |
| O1_4  | Al3   | O1_5             | 112.9 (6)   | C3_16 | C1_9 | C2_9  | 38.2 (5)   |
| N2    | Fe2   | C6               | 94.47 (13)  | C3_16 | C1_9 | C3_9  | 75.7 (6)   |
| N2    | Fe2   | C8               | 123.78 (15) | C3_16 | C1_9 | C4_9  | 138.5 (6)  |
| N2    | Fe2   | C9               | 91.77 (13)  | O1_9  | C1_9 | O1_16 | 4 (2)      |
| N2    | Fe2   | C10              | 114.51 (13) | O1_9  | C1_9 | C2_16 | 109.0 (6)  |
| C6    | Fe2   | C9               | 173.73 (13) | O1_9  | C1_9 | C3_16 | 107.3 (7)  |
| C8    | Fe2   | C6               | 88.11 (15)  | O1_9  | C1_9 | C4_16 | 107.8 (7)  |
| C8    | Fe2   | C9               | 87.87 (16)  | O1_9  | C1_9 | C2_9  | 111.5 (4)  |
| C8    | Fe2   | C10              | 121.70 (15) | O1_9  | C1_9 | C3_9  | 108.7 (4)  |
| C10   | Fe2   | C6               | 86.79 (13)  | O1_9  | C1_9 | C4_9  | 109.4 (5)  |
| C10   | Fe2   | C9               | 91.23 (14)  | C2_9  | C1_9 | C4_16 | 69.1 (5)   |
| O7    | N2    | Fe2              | 177.1 (3)   | C3_9  | C1_9 | C4_16 | 140.7 (5)  |
| Al3   | F2    | Al3 <sup>2</sup> | 180.00 (3)  | C3_9  | C1_9 | C2_9  | 109.4 (3)  |
| O1_12 | Al2   | F1               | 100.70 (9)  | C4_9  | C1_9 | C4_16 | 43.4 (5)   |
| O1_11 | Al2   | F1               | 104.88 (9)  | C4_9  | C1_9 | C2_9  | 108.4 (3)  |
| O1_11 | Al2   | O1_12            | 110.86 (10) | C4_9  | C1_9 | C3_9  | 109.3 (3)  |
| O1_10 | Al2   | F1               | 107.47 (9)  | C1_16 | C2_9 | C4_16 | 54.9 (5)   |
| O1_10 | Al2   | O1_12            | 118.67 (10) | C1_16 | C2_9 | F7_16 | 93.0 (7)   |
| O1_10 | Al2   | O1_11            | 112.57 (10) | C1_16 | C2_9 | C1_9  | 3.4 (6)    |
| O2    | C2    | Fe1              | 178.3 (3)   | C3_16 | C2_9 | C1_16 | 72.2 (8)   |
| O1_3  | Al4   | F3               | 107.27 (8)  | C3_16 | C2_9 | F4_16 | 64.9 (14)  |
| O1_3  | Al4   | O1_2             | 115.78 (11) | C3_16 | C2_9 | F6_16 | 64.3 (10)  |
| O1_3  | Al4   | O1_1             | 112.54 (11) | C3_16 | C2_9 | C4_16 | 125.3 (9)  |
| O1_2  | Al4   | F3               | 100.25 (8)  | C3_16 | C2_9 | F7_16 | 162.9 (10) |
| O1_1  | Al4   | F3               | 106.06 (8)  | C3_16 | C2_9 | C1_9  | 69.4 (8)   |
| O1_1  | Al4   | O1_2             | 113.47 (10) | C3_16 | C2_9 | F1_9  | 169.9 (9)  |
| O4    | C4    | Fe1              | 178.0 (3)   | C3_16 | C2_9 | F2_9  | 81.0 (8)   |
| O5    | C5    | Fe1              | 177.0 (3)   | C3_16 | C2_9 | F3_9  | 63.5 (9)   |
| O6    | C6    | Fe2              | 176.5 (3)   | F4_16 | C2_9 | C1_16 | 108.6 (19) |
| O8    | C8    | Fe2              | 178.8 (3)   | F4_16 | C2_9 | F6_16 | 101.3 (18) |
| O9    | C9    | Fe2              | 177.9 (3)   | F4_16 | C2_9 | C4_16 | 141.1 (18) |
| O10   | C10   | Fe2              | 177.5 (3)   | F4_16 | C2_9 | F7_16 | 113.9 (14) |
| C1_17 | O1_17 | Al3              | 154 (3)     | F4_16 | C2_9 | C1_9  | 108.4 (19) |
| O1_17 | C1_17 | C2_17            | 108.2 (15)  | F6_16 | C2_9 | C1_16 | 107.9 (13) |
| O1_17 | C1_17 | C3_17            | 109.6 (19)  | F6_16 | C2_9 | C4_16 | 117.0 (13) |
| O1_17 | C1_17 | C4_17            | 110.7 (18)  | F6_16 | C2_9 | F7_16 | 130.5 (11) |
| C2_17 | C1_17 | C4_17            | 110.1 (12)  | F6_16 | C2_9 | C1_9  | 104.8 (13) |
| C3_17 | C1_17 | C2_17            | 109.7 (11)  | F7_16 | C2_9 | C4_16 | 44.1 (5)   |
| C3_17 | C1_17 | C4_17            | 108.4 (12)  | C1_9  | C2_9 | C4_16 | 57.2 (5)   |
| F1_17 | C2_17 | C1_17            | 109.3 (13)  | C1_9  | C2_9 | F7_16 | 96.1 (5)   |
| F2_17 | C2_17 | C1_17            | 111.0 (14)  | F1_9  | C2_9 | C1_16 | 108.0 (6)  |
| F2_17 | C2_17 | F1_17            | 107.8 (15)  | F1_9  | C2_9 | F4_16 | 106.1 (13) |
| F3_17 | C2_17 | C1_17            | 111.6 (17)  | F1_9  | C2_9 | F6_16 | 123.9 (9)  |
| F3_17 | C2_17 | F1_17            | 107.2 (18)  | F1_9  | C2_9 | C4_16 | 58.3 (5)   |
| F3_17 | C2_17 | F2_17            | 109.9 (18)  | F1_9  | C2_9 | F7_16 | 15.1 (5)   |
| F4_17 | C3_17 | C1_17            | 110.1 (18)  | F1_9  | C2_9 | C1_9  | 111.1 (3)  |
| F4_17 | C3_17 | F6_17            | 107.7 (19)  | F2_9  | C2_9 | C1_16 | 114.8 (7)  |
| F5_17 | C3_17 | C1_17            | 110.2 (14)  | F2_9  | C2_9 | F4_16 | 111.5 (19) |
| F5_17 | C3_17 | F4_17            | 109.3 (19)  | F2_9  | C2_9 | F6_16 | 16.7 (9)   |
| F5_17 | C3_17 | F6_17            | 108.0 (16)  | F2_9  | C2_9 | C4_16 | 107.3 (5)  |
| F6_17 | C3_17 | C1_17            | 111.5 (14)  | F2_9  | C2_9 | F7_16 | 113.8 (7)  |
| F7_17 | C4_17 | C1_17            | 109.5 (13)  | F2_9  | C2_9 | C1_9  | 112.1 (4)  |
| F7_17 | C4_17 | F8_17            | 106.0 (18)  | F2_9  | C2_9 | F1_9  | 107.4 (4)  |
| F8_17 | C4_17 | C1_17            | 111.4 (17)  | F2_9  | C2_9 | F3_9  | 108.6 (5)  |
| F9_17 | C4_17 | C1_17            | 109.7 (17)  | F3_9  | C2_9 | C1_16 | 110.0 (8)  |
| F9_17 | C4_17 | F7_17            | 110.2 (17)  | F3_9  | C2_9 | F4_16 | 3 (2)      |
| F9_17 | C4_17 | F8_17            | 110 (2)     | F3_9  | C2_9 | F6_16 | 98.5 (14)  |
| C1_16 | O1_16 | Al1              | 145 (2)     | F3_9  | C2_9 | C4_16 | 144.0 (6)  |
| C1_16 | O1_16 | C1_9             | 3.7 (7)     | F3_9  | C2_9 | F7_16 | 116.0 (7)  |
| C1_9  | O1_16 | Al1              | 148 (2)     | F3_9  | C2_9 | C1_9  | 109.6 (5)  |
| O1_16 | C1_16 | C2_16            | 106.4 (13)  | F3_9  | C2_9 | F1_9  | 107.8 (5)  |
| O1_16 | C1_16 | C3_16            | 111.0 (18)  | F7_16 | F1_9 | C4_16 | 52.8 (16)  |
| O1_16 | C1_16 | C4_16            | 110.4 (18)  | F7_16 | F1_9 | C2_9  | 125.9 (18) |
| O1_16 | C1_16 | C2_9             | 116.7 (16)  | C2_9  | F1_9 | C4_16 | 75.8 (5)   |
| O1_16 | C1_16 | C3_9             | 107.6 (15)  | C2_9  | F2_9 | C3_16 | 40.4 (5)   |



|                 |            |                 |            |
|-----------------|------------|-----------------|------------|
| O1_16C1_16C4_9  | 108.9 (17) | C3_16F3_9 C2_9  | 45.8 (6)   |
| C2_16C1_16C4_16 | 110.0 (10) | C1_16C3_9 C3_16 | 51.4 (5)   |
| C2_16C1_16C3_9  | 40.5 (6)   | C1_16C3_9 F5_16 | 90.0 (6)   |
| C3_16C1_16C2_16 | 110.1 (10) | C2_16C3_9 C1_16 | 65.0 (7)   |
| C3_16C1_16C4_16 | 108.9 (10) | C2_16C3_9 F2_16 | 58.9 (8)   |
| C3_16C1_16C3_9  | 72.4 (7)   | C2_16C3_9 F3_16 | 66.7 (12)  |
| C4_16C1_16C3_9  | 138.1 (11) | C2_16C3_9 C3_16 | 113.1 (8)  |
| O1_9 C1_16O1_16 | 4 (2)      | C2_16C3_9 F5_16 | 154.9 (8)  |
| O1_9 C1_16C2_16 | 106.5 (11) | C2_16C3_9 C1_9  | 64.8 (7)   |
| O1_9 C1_16C3_16 | 107.7 (11) | C2_16C3_9 F4_9  | 71.9 (9)   |
| O1_9 C1_16C4_16 | 113.7 (11) | C2_16C3_9 F5_9  | 174.2 (7)  |
| O1_9 C1_16C2_9  | 115.4 (10) | C2_16C3_9 F6_9  | 78.5 (7)   |
| O1_9 C1_16C3_9  | 105.0 (10) | F2_16C3_9 C1_16 | 97.8 (9)   |
| O1_9 C1_16C4_9  | 112.6 (11) | F2_16C3_9 C3_16 | 108.6 (10) |
| C2_9 C1_16C2_16 | 133.3 (12) | F2_16C3_9 F5_16 | 127.5 (9)  |
| C2_9 C1_16C3_16 | 38.3 (6)   | F2_16C3_9 C1_9  | 97.6 (8)   |
| C2_9 C1_16C4_16 | 71.7 (8)   | F3_16C3_9 C1_16 | 107.3 (15) |
| C2_9 C1_16C3_9  | 106.1 (9)  | F3_16C3_9 F2_16 | 100.2 (15) |
| C2_9 C1_16C4_9  | 111.3 (9)  | F3_16C3_9 C3_16 | 145.6 (16) |
| C4_9 C1_16C2_16 | 67.8 (8)   | F3_16C3_9 F5_16 | 126.8 (13) |
| C4_9 C1_16C3_16 | 138.5 (12) | F3_16C3_9 C1_9  | 107.3 (15) |
| C4_9 C1_16C4_16 | 44.9 (6)   | F3_16C3_9 F4_9  | 5.3 (15)   |
| C4_9 C1_16C3_9  | 105.6 (8)  | F3_16C3_9 F5_9  | 113.3 (12) |
| C1_16C2_16F6_9  | 106.8 (10) | F3_16C3_9 F6_9  | 106.4 (15) |
| C1_16C2_16C4_9  | 55.5 (6)   | F5_16C3_9 C3_16 | 42.9 (4)   |
| C1_16C2_16F7_9  | 96.0 (8)   | C1_9 C3_9 C1_16 | 0.2 (8)    |
| F1_16C2_16C1_16 | 108.5 (12) | C1_9 C3_9 C3_16 | 51.5 (5)   |
| F1_16C2_16F2_16 | 109.8 (15) | C1_9 C3_9 F5_16 | 90.2 (5)   |
| F1_16C2_16F3_16 | 109.0 (17) | F4_9 C3_9 C1_16 | 111.0 (7)  |
| F1_16C2_16C1_9  | 110.8 (12) | F4_9 C3_9 F2_16 | 103.1 (10) |
| F1_16C2_16F4_9  | 111.2 (14) | F4_9 C3_9 C3_16 | 145.3 (6)  |
| F1_16C2_16F6_9  | 127.4 (14) | F4_9 C3_9 F5_16 | 122.2 (7)  |
| F1_16C2_16C4_9  | 60.4 (10)  | F4_9 C3_9 C1_9  | 111.0 (4)  |
| F1_16C2_16F7_9  | 14.2 (10)  | F4_9 C3_9 F5_9  | 108.2 (4)  |
| F2_16C2_16C1_16 | 110.9 (13) | F4_9 C3_9 F6_9  | 107.6 (5)  |
| F2_16C2_16C1_9  | 109.9 (13) | F5_9 C3_9 C1_16 | 110.0 (5)  |
| F2_16C2_16F4_9  | 106.1 (14) | F5_9 C3_9 F2_16 | 126.1 (7)  |
| F2_16C2_16F6_9  | 19.0 (9)   | F5_9 C3_9 C3_16 | 63.3 (4)   |
| F2_16C2_16C4_9  | 102.1 (12) | F5_9 C3_9 F5_16 | 20.7 (4)   |
| F2_16C2_16F7_9  | 109.8 (12) | F5_9 C3_9 C1_9  | 110.2 (3)  |
| F3_16C2_16C1_16 | 110.8 (15) | F5_9 C3_9 F6_9  | 106.8 (3)  |
| F3_16C2_16F2_16 | 107.7 (17) | F6_9 C3_9 C1_16 | 113.1 (6)  |
| F3_16C2_16C1_9  | 109.5 (16) | F6_9 C3_9 F2_16 | 20.2 (6)   |
| F3_16C2_16F4_9  | 2.3 (19)   | F6_9 C3_9 C3_16 | 107.0 (5)  |
| F3_16C2_16F6_9  | 93.1 (17)  | F6_9 C3_9 F5_16 | 112.1 (6)  |
| F3_16C2_16C4_9  | 150.2 (17) | F6_9 C3_9 C1_9  | 112.9 (3)  |
| F3_16C2_16F7_9  | 121.0 (17) | C3_9 F4_9 C2_16 | 47.4 (6)   |
| C1_9 C2_16C1_16 | 2.3 (6)    | F5_16F5_9 C3_16 | 41.1 (12)  |
| C1_9 C2_16F6_9  | 105.1 (8)  | F5_16F5_9 C3_9  | 114.5 (13) |
| C1_9 C2_16C4_9  | 57.5 (5)   | C3_9 F5_9 C3_16 | 74.1 (5)   |
| C1_9 C2_16F7_9  | 98.3 (8)   | F2_16F6_9 C2_16 | 55.5 (17)  |
| C3_9 C2_16C1_16 | 74.4 (8)   | F2_16F6_9 C3_9  | 98.5 (19)  |
| C3_9 C2_16F1_16 | 171.7 (16) | C3_9 F6_9 C2_16 | 44.3 (5)   |
| C3_9 C2_16F2_16 | 75.5 (11)  | C1_16C4_9 C2_16 | 56.8 (5)   |
| C3_9 C2_16F3_16 | 62.9 (17)  | C1_16C4_9 F1_16 | 98.1 (8)   |
| C3_9 C2_16C1_9  | 72.2 (7)   | C1_16C4_9 F8_16 | 100.9 (8)  |
| C3_9 C2_16F4_9  | 60.7 (8)   | C1_16C4_9 C1_9  | 3.5 (6)    |
| C3_9 C2_16F6_9  | 57.1 (6)   | F1_16C4_9 C2_16 | 47.2 (5)   |
| C3_9 C2_16C4_9  | 125.7 (10) | F1_16C4_9 F8_16 | 133.2 (11) |
| C3_9 C2_16F7_9  | 170.4 (10) | C4_16C4_9 C1_16 | 68.7 (7)   |
| F4_9 C2_16C1_16 | 110.2 (11) | C4_16C4_9 C2_16 | 122.0 (8)  |
| F4_9 C2_16C1_9  | 108.8 (10) | C4_16C4_9 F1_16 | 166.4 (10) |
| F4_9 C2_16F6_9  | 91.2 (9)   | C4_16C4_9 F8_16 | 55.7 (7)   |
| F4_9 C2_16C4_9  | 151.6 (10) | C4_16C4_9 F9_16 | 60.8 (9)   |
| F4_9 C2_16F7_9  | 123.3 (10) | C4_16C4_9 C1_9  | 71.5 (7)   |
| F6_9 C2_16C4_9  | 115.7 (9)  | C4_16C4_9 F7_9  | 169.1 (7)  |

|                  |            |                  |             |
|------------------|------------|------------------|-------------|
| F6_9 C2_16F7_9   | 128.7 (9)  | C4_16C4_9 F8_9   | 80.1 (6)    |
| F7_9 C2_16C4_9   | 46.2 (4)   | C4_16C4_9 F9_9   | 61.3 (7)    |
| C2_16F1_16 C4_9  | 72.4 (10)  | F8_16 C4_9 C2_16 | 115.1 (8)   |
| C2_16F2_16 C3_9  | 45.6 (8)   | F9_16 C4_9 C1_16 | 107.0 (11)  |
| F6_9 F2_16 C2_16 | 106 (2)    | F9_16 C4_9 C2_16 | 150.5 (9)   |
| F6_9 F2_16 C3_9  | 61.3 (18)  | F9_16 C4_9 F1_16 | 123.3 (11)  |
| C3_9 F3_16 C2_16 | 50.5 (9)   | F9_16 C4_9 F8_16 | 91.0 (9)    |
| C1_16C3_16C3_9   | 56.3 (6)   | F9_16 C4_9 C1_9  | 110.4 (10)  |
| C1_16C3_16F5_9   | 95.4 (8)   | C1_9 C4_9 C2_16  | 53.4 (5)    |
| F4_16 C3_16C1_16 | 110.5 (18) | C1_9 C4_9 F1_16  | 95.4 (7)    |
| F4_16 C3_16F5_16 | 108.4 (18) | C1_9 C4_9 F8_16  | 101.4 (6)   |
| F4_16 C3_16F6_16 | 109.0 (19) | F7_9 C4_9 C1_16  | 113.1 (6)   |
| F4_16 C3_16C1_9  | 113.6 (19) | F7_9 C4_9 C2_16  | 64.2 (5)    |
| F4_16 C3_16F2_9  | 103 (2)    | F7_9 C4_9 F1_16  | 17.1 (6)    |
| F4_16 C3_16C3_9  | 150 (2)    | F7_9 C4_9 F8_16  | 132.0 (6)   |
| F4_16 C3_16F5_9  | 125.9 (18) | F7_9 C4_9 F9_16  | 109.1 (9)   |
| F5_16 C3_16C1_16 | 111.5 (11) | F7_9 C4_9 C1_9   | 110.7 (3)   |
| F5_16 C3_16C1_9  | 108.5 (11) | F7_9 C4_9 F8_9   | 108.1 (4)   |
| F5_16 C3_16F2_9  | 120.6 (12) | F7_9 C4_9 F9_9   | 108.5 (4)   |
| F5_16 C3_16C3_9  | 61.6 (8)   | F8_9 C4_9 C1_16  | 112.8 (7)   |
| F5_16 C3_16F5_9  | 19.2 (7)   | F8_9 C4_9 C2_16  | 102.7 (5)   |
| F6_16 C3_16C1_16 | 110.6 (14) | F8_9 C4_9 F1_16  | 109.0 (10)  |
| F6_16 C3_16F5_16 | 106.7 (14) | F8_9 C4_9 F8_16  | 24.4 (4)    |
| F6_16 C3_16C1_9  | 110.4 (15) | F8_9 C4_9 F9_16  | 106.5 (8)   |
| F6_16 C3_16F2_9  | 13.9 (12)  | F8_9 C4_9 C1_9   | 111.8 (3)   |
| F6_16 C3_16C3_9  | 101.0 (15) | F9_9 C4_9 C1_16  | 106.3 (7)   |
| F6_16 C3_16F5_9  | 104.4 (13) | F9_9 C4_9 C2_16  | 149.2 (6)   |
| C1_9 C3_16C1_16  | 3.5 (6)    | F9_9 C4_9 F1_16  | 122.5 (8)   |
| C1_9 C3_16F2_9   | 102.8 (8)  | F9_9 C4_9 F8_16  | 92.2 (7)    |
| C1_9 C3_16C3_9   | 52.8 (4)   | F9_9 C4_9 F9_16  | 1.4 (10)    |
| C1_9 C3_16F5_9   | 92.2 (7)   | F9_9 C4_9 C1_9   | 109.7 (4)   |
| C2_9 C3_16C1_16  | 69.5 (9)   | F9_9 C4_9 F8_9   | 107.9 (4)   |
| C2_9 C3_16F4_16  | 71.5 (19)  | C4_9 F7_9 C2_16  | 69.5 (5)    |
| C2_9 C3_16F5_16  | 179.0 (15) | F8_16 F8_9 C4_16 | 52.9 (11)   |
| C2_9 C3_16F6_16  | 72.4 (14)  | F8_16 F8_9 C4_9  | 98.4 (12)   |
| C2_9 C3_16C1_9   | 72.4 (7)   | C4_9 F8_9 C4_16  | 45.6 (5)    |
| C2_9 C3_16F2_9   | 58.6 (7)   | C4_16F9_9 C4_9   | 53.3 (6)    |
| C2_9 C3_16F3_9   | 70.7 (10)  | C1_8 O1_8 All    | 143.51 (16) |
| C2_9 C3_16C3_9   | 118.9 (10) | O1_8 C1_8 C2_8   | 112.1 (2)   |
| C2_9 C3_16F5_9   | 161.2 (11) | O1_8 C1_8 C3_8   | 109.4 (2)   |
| F2_9 C3_16C1_16  | 102.3 (10) | O1_8 C1_8 C4_8   | 107.5 (2)   |
| F2_9 C3_16C3_9   | 106.2 (8)  | C2_8 C1_8 C3_8   | 108.6 (2)   |
| F2_9 C3_16F5_9   | 117.1 (9)  | C2_8 C1_8 C4_8   | 109.7 (2)   |
| F3_9 C3_16C1_16  | 112.3 (12) | C4_8 C1_8 C3_8   | 109.5 (2)   |
| F3_9 C3_16F4_16  | 3 (3)      | F1_8 C2_8 C1_8   | 110.3 (2)   |
| F3_9 C3_16F5_16  | 109.2 (13) | F1_8 C2_8 F2_8   | 108.7 (2)   |
| F3_9 C3_16F6_16  | 106 (2)    | F1_8 C2_8 F3_8   | 107.0 (2)   |
| F3_9 C3_16C1_9   | 115.5 (11) | F2_8 C2_8 C1_8   | 112.7 (2)   |
| F3_9 C3_16F2_9   | 100.5 (10) | F2_8 C2_8 F3_8   | 106.9 (2)   |
| F3_9 C3_16C3_9   | 152.7 (12) | F3_8 C2_8 C1_8   | 111.0 (2)   |
| F3_9 C3_16F5_9   | 127.0 (11) | F4_8 C3_8 C1_8   | 111.6 (2)   |
| F5_9 C3_16C3_9   | 42.6 (3)   | F4_8 C3_8 F6_8   | 107.3 (2)   |
| C3_16F4_16 C2_9  | 43.6 (8)   | F5_8 C3_8 C1_8   | 110.3 (2)   |
| C3_16F5_16 C3_9  | 75.5 (8)   | F5_8 C3_8 F4_8   | 107.4 (2)   |
| F5_9 F5_16 C3_16 | 119.7 (18) | F5_8 C3_8 F6_8   | 107.8 (2)   |
| F5_9 F5_16 C3_9  | 44.9 (11)  | F6_8 C3_8 C1_8   | 112.2 (2)   |
| C3_16F6_16 C2_9  | 43.3 (8)   | F7_8 C4_8 C1_8   | 111.0 (2)   |
| C1_16C4_16C1_9   | 2.4 (7)    | F7_8 C4_8 F9_8   | 107.0 (2)   |
| C1_16C4_16C2_9   | 53.4 (6)   | F8_8 C4_8 C1_8   | 112.0 (2)   |
| C1_16C4_16F1_9   | 95.2 (8)   | F8_8 C4_8 F7_8   | 108.0 (2)   |
| C1_16C4_16F8_9   | 97.6 (9)   | F8_8 C4_8 F9_8   | 108.5 (2)   |
| F7_16 C4_16C1_16 | 109.6 (11) | F9_8 C4_8 C1_8   | 110.1 (2)   |
| F7_16 C4_16F8_16 | 108.0 (13) | C1_7 O1_7 All    | 148.6 (7)   |
| F7_16 C4_16F9_16 | 110.4 (15) | O1_7 C1_7 C2_7   | 111.1 (6)   |
| F7_16 C4_16C1_9  | 111.2 (11) | O1_7 C1_7 C3_7   | 108.6 (6)   |
| F7_16 C4_16C2_9  | 64.6 (9)   | O1_7 C1_7 C4_7   | 109.1 (7)   |

|                   |            |                |            |
|-------------------|------------|----------------|------------|
| F7_16 C4_16 F1_9  | 19.4 (7)   | C3_7 C1_7 C2_7 | 109.7 (4)  |
| F7_16 C4_16 F8_9  | 131.1 (12) | C3_7 C1_7 C4_7 | 108.9 (4)  |
| F8_16 C4_16 C1_16 | 111.9 (11) | C4_7 C1_7 C2_7 | 109.3 (4)  |
| F8_16 C4_16 C1_9  | 109.5 (10) | F1_7 C2_7 C1_7 | 108.4 (5)  |
| F8_16 C4_16 C2_9  | 100.0 (10) | F2_7 C2_7 C1_7 | 113.1 (7)  |
| F8_16 C4_16 F1_9  | 103.2 (10) | F2_7 C2_7 F1_7 | 107.8 (7)  |
| F8_16 C4_16 F8_9  | 23.2 (6)   | F3_7 C2_7 C1_7 | 110.0 (4)  |
| F9_16 C4_16 C1_16 | 110.2 (12) | F3_7 C2_7 F1_7 | 108.7 (5)  |
| F9_16 C4_16 F8_16 | 106.7 (14) | F3_7 C2_7 F2_7 | 108.6 (7)  |
| F9_16 C4_16 C1_9  | 111.0 (12) | F4_7 C3_7 C1_7 | 111.3 (4)  |
| F9_16 C4_16 C2_9  | 152.8 (12) | F4_7 C3_7 F5_7 | 106.8 (5)  |
| F9_16 C4_16 F1_9  | 129.0 (14) | F4_7 C3_7 F6_7 | 107.8 (4)  |
| F9_16 C4_16 F8_9  | 96.2 (13)  | F5_7 C3_7 C1_7 | 110.3 (6)  |
| C1_9 C4_16 C2_9   | 53.7 (4)   | F6_7 C3_7 C1_7 | 112.8 (4)  |
| F1_9 C4_16 C1_9   | 96.2 (7)   | F6_7 C3_7 F5_7 | 107.6 (6)  |
| F1_9 C4_16 C2_9   | 45.9 (4)   | F7_7 C4_7 C1_7 | 111.2 (4)  |
| F1_9 C4_16 F8_9   | 124.1 (8)  | F7_7 C4_7 F9_7 | 108.8 (5)  |
| C4_9 C4_16 C1_16  | 66.4 (8)   | F8_7 C4_7 C1_7 | 111.3 (6)  |
| C4_9 C4_16 F7_16  | 174.4 (13) | F8_7 C4_7 F7_7 | 108.8 (6)  |
| C4_9 C4_16 F8_16  | 77.5 (9)   | F8_7 C4_7 F9_7 | 107.0 (5)  |
| C4_9 C4_16 F9_16  | 68.4 (13)  | F9_7 C4_7 C1_7 | 109.7 (5)  |
| C4_9 C4_16 C1_9   | 65.1 (6)   | C1_6 O1_6 A13  | 150.6 (4)  |
| C4_9 C4_16 C2_9   | 113.8 (9)  | O1_6 C1_6 C2_6 | 109.9 (3)  |
| C4_9 C4_16 F1_9   | 159.7 (11) | O1_6 C1_6 C3_6 | 110.8 (3)  |
| C4_9 C4_16 F8_9   | 54.3 (5)   | O1_6 C1_6 C4_6 | 108.5 (3)  |
| C4_9 C4_16 F9_9   | 65.4 (8)   | C2_6 C1_6 C3_6 | 109.5 (3)  |
| F8_9 C4_16 C1_9   | 95.2 (7)   | C2_6 C1_6 C4_6 | 109.1 (3)  |
| F8_9 C4_16 C2_9   | 106.8 (7)  | C4_6 C1_6 C3_6 | 109.0 (3)  |
| F9_9 C4_16 C1_16  | 107.3 (10) | F1_6 C2_6 C1_6 | 110.5 (3)  |
| F9_9 C4_16 F7_16  | 113.2 (12) | F1_6 C2_6 F2_6 | 108.1 (3)  |
| F9_9 C4_16 F8_16  | 106.8 (12) | F1_6 C2_6 F3_6 | 107.6 (3)  |
| F9_9 C4_16 F9_16  | 3.3 (13)   | F2_6 C2_6 C1_6 | 112.9 (3)  |
| F9_9 C4_16 C1_9   | 108.0 (9)  | F3_6 C2_6 C1_6 | 110.3 (3)  |
| F9_9 C4_16 C2_9   | 151.9 (9)  | F3_6 C2_6 F2_6 | 107.3 (3)  |
| F9_9 C4_16 F1_9   | 131.6 (10) | F4_6 C3_6 C1_6 | 110.7 (3)  |
| F9_9 C4_16 F8_9   | 95.2 (8)   | F4_6 C3_6 F5_6 | 107.9 (3)  |
| C4_16 F7_16 C2_9  | 71.4 (8)   | F5_6 C3_6 C1_6 | 109.7 (3)  |
| F1_9 F7_16 C4_16  | 108 (2)    | F6_6 C3_6 C1_6 | 112.5 (3)  |
| F1_9 F7_16 C2_9   | 39.0 (15)  | F6_6 C3_6 F4_6 | 107.7 (4)  |
| C4_16 F8_16 C4_9  | 46.8 (7)   | F6_6 C3_6 F5_6 | 108.2 (4)  |
| F8_9 F8_16 C4_16  | 103.9 (15) | F7_6 C4_6 C1_6 | 110.9 (3)  |
| F8_9 F8_16 C4_9   | 57.2 (11)  | F8_6 C4_6 C1_6 | 112.1 (3)  |
| C4_16 F9_16 C4_9  | 50.8 (8)   | F8_6 C4_6 F7_6 | 107.8 (3)  |
| C1_15 O1_15 A11   | 153.6 (19) | F9_6 C4_6 C1_6 | 110.5 (3)  |
| O1_15 C1_15 C2_15 | 109.1 (15) | F9_6 C4_6 F7_6 | 107.8 (3)  |
| O1_15 C1_15 C3_15 | 109.5 (13) | F9_6 C4_6 F8_6 | 107.5 (3)  |
| O1_15 C1_15 C4_15 | 107.5 (14) | C1_5 O1_5 A13  | 147.9 (12) |
| C2_15 C1_15 C3_15 | 110.5 (8)  | O1_5 C1_5 C2_5 | 108.0 (7)  |
| C2_15 C1_15 C4_15 | 109.9 (8)  | O1_5 C1_5 C3_5 | 110.1 (10) |
| C4_15 C1_15 C3_15 | 110.3 (9)  | O1_5 C1_5 C4_5 | 111.0 (10) |
| F1_15 C2_15 C1_15 | 111.1 (13) | C3_5 C1_5 C2_5 | 110.3 (5)  |
| F1_15 C2_15 F2_15 | 108.7 (14) | C4_5 C1_5 C2_5 | 108.8 (5)  |
| F1_15 C2_15 F3_15 | 108.2 (12) | C4_5 C1_5 C3_5 | 108.6 (5)  |
| F2_15 C2_15 C1_15 | 111.4 (9)  | F1_5 C2_5 C1_5 | 110.3 (5)  |
| F3_15 C2_15 C1_15 | 110.1 (8)  | F1_5 C2_5 F2_5 | 107.5 (7)  |
| F3_15 C2_15 F2_15 | 107.1 (8)  | F2_5 C2_5 C1_5 | 112.3 (7)  |
| F4_15 C3_15 C1_15 | 108.3 (9)  | F3_5 C2_5 C1_5 | 111.6 (6)  |
| F5_15 C3_15 C1_15 | 108.5 (10) | F3_5 C2_5 F1_5 | 107.1 (5)  |
| F5_15 C3_15 F4_15 | 112.7 (11) | F3_5 C2_5 F2_5 | 107.7 (6)  |
| F6_15 C3_15 C1_15 | 111.4 (15) | F4_5 C3_5 C1_5 | 109.4 (7)  |
| F6_15 C3_15 F4_15 | 107.9 (15) | F5_5 C3_5 C1_5 | 110.5 (5)  |
| F6_15 C3_15 F5_15 | 108.1 (16) | F5_5 C3_5 F4_5 | 108.1 (5)  |
| F7_15 C4_15 C1_15 | 108.1 (9)  | F6_5 C3_5 C1_5 | 112.2 (6)  |
| F7_15 C4_15 F9_15 | 108.5 (9)  | F6_5 C3_5 F4_5 | 108.3 (8)  |
| F8_15 C4_15 C1_15 | 117.1 (11) | F6_5 C3_5 F5_5 | 108.2 (6)  |
| F8_15 C4_15 F7_15 | 108.6 (13) | F7_5 C4_5 C1_5 | 111.6 (4)  |

|                   |             |                |             |
|-------------------|-------------|----------------|-------------|
| F8_15 C4_15 F9_15 | 104.6 (12)  | F7_5 C4_5 F8_5 | 107.7 (4)   |
| F9_15 C4_15 C1_15 | 109.7 (9)   | F7_5 C4_5 F9_5 | 107.8 (6)   |
| C1_14 O1_14 A13   | 150 (2)     | F8_5 C4_5 C1_5 | 112.7 (5)   |
| O1_14 C1_14 C2_14 | 108.5 (15)  | F8_5 C4_5 F9_5 | 106.8 (9)   |
| O1_14 C1_14 C3_14 | 109.0 (16)  | F9_5 C4_5 C1_5 | 110.0 (8)   |
| O1_14 C1_14 C4_14 | 109.6 (15)  | C1_4 O1_4 A13  | 143.5 (4)   |
| C3_14 C1_14 C2_14 | 110.4 (10)  | O1_4 C1_4 C2_4 | 111.3 (4)   |
| C4_14 C1_14 C2_14 | 110.1 (10)  | O1_4 C1_4 C3_4 | 107.2 (3)   |
| C4_14 C1_14 C3_14 | 109.2 (10)  | O1_4 C1_4 C4_4 | 110.8 (4)   |
| F1_14 C2_14 C1_14 | 109.4 (15)  | C3_4 C1_4 C2_4 | 109.1 (3)   |
| F1_14 C2_14 F2_14 | 107.4 (17)  | C3_4 C1_4 C4_4 | 110.0 (3)   |
| F2_14 C2_14 C1_14 | 110.1 (12)  | C4_4 C1_4 C2_4 | 108.5 (3)   |
| F3_14 C2_14 C1_14 | 110.6 (10)  | F1_4 C2_4 C1_4 | 109.8 (4)   |
| F3_14 C2_14 F1_14 | 111.9 (17)  | F2_4 C2_4 C1_4 | 113.7 (3)   |
| F3_14 C2_14 F2_14 | 107.4 (11)  | F2_4 C2_4 F1_4 | 107.5 (4)   |
| F4_14 C3_14 C1_14 | 110.1 (10)  | F3_4 C2_4 C1_4 | 111.0 (3)   |
| F4_14 C3_14 F6_14 | 105.2 (16)  | F3_4 C2_4 F1_4 | 106.8 (4)   |
| F5_14 C3_14 C1_14 | 109.8 (15)  | F3_4 C2_4 F2_4 | 107.8 (3)   |
| F5_14 C3_14 F4_14 | 110.6 (14)  | F4_4 C3_4 C1_4 | 110.8 (3)   |
| F5_14 C3_14 F6_14 | 109.2 (19)  | F4_4 C3_4 F6_4 | 107.2 (4)   |
| F6_14 C3_14 C1_14 | 111.9 (17)  | F5_4 C3_4 C1_4 | 110.6 (4)   |
| F7_14 C4_14 C1_14 | 109.8 (14)  | F5_4 C3_4 F4_4 | 108.5 (4)   |
| F8_14 C4_14 C1_14 | 113.2 (14)  | F5_4 C3_4 F6_4 | 107.5 (5)   |
| F8_14 C4_14 F7_14 | 107.2 (16)  | F6_4 C3_4 C1_4 | 112.0 (4)   |
| F9_14 C4_14 C1_14 | 110.7 (10)  | F7_4 C4_4 C1_4 | 111.1 (4)   |
| F9_14 C4_14 F7_14 | 109.0 (13)  | F7_4 C4_4 F8_4 | 107.5 (5)   |
| F9_14 C4_14 F8_14 | 106.9 (14)  | F7_4 C4_4 F9_4 | 107.9 (4)   |
| C1_13 O1_13 A13   | 147.1 (16)  | F8_4 C4_4 C1_4 | 112.1 (5)   |
| O1_13 C1_13 C2_13 | 107.6 (11)  | F9_4 C4_4 C1_4 | 110.7 (3)   |
| O1_13 C1_13 C3_13 | 109.1 (14)  | F9_4 C4_4 F8_4 | 107.4 (4)   |
| O1_13 C1_13 C4_13 | 111.3 (12)  | C1_3 O1_3 A14  | 155.64 (19) |
| C3_13 C1_13 C2_13 | 108.4 (6)   | O1_3 C1_3 C2_3 | 109.4 (2)   |
| C4_13 C1_13 C2_13 | 110.8 (7)   | O1_3 C1_3 C3_3 | 108.5 (2)   |
| C4_13 C1_13 C3_13 | 109.7 (7)   | O1_3 C1_3 C4_3 | 110.5 (2)   |
| F1_13 C2_13 C1_13 | 109.4 (6)   | C2_3 C1_3 C4_3 | 109.0 (2)   |
| F1_13 C2_13 F2_13 | 107.5 (9)   | C3_3 C1_3 C2_3 | 110.0 (2)   |
| F2_13 C2_13 C1_13 | 111.4 (8)   | C3_3 C1_3 C4_3 | 109.4 (2)   |
| F3_13 C2_13 C1_13 | 111.1 (7)   | F1_3 C2_3 C1_3 | 110.7 (3)   |
| F3_13 C2_13 F1_13 | 108.5 (7)   | F1_3 C2_3 F2_3 | 107.7 (3)   |
| F3_13 C2_13 F2_13 | 108.9 (10)  | F2_3 C2_3 C1_3 | 111.4 (2)   |
| F4_13 C3_13 C1_13 | 108.8 (11)  | F3_3 C2_3 C1_3 | 110.3 (2)   |
| F5_13 C3_13 C1_13 | 111.3 (5)   | F3_3 C2_3 F1_3 | 109.1 (3)   |
| F5_13 C3_13 F4_13 | 108.1 (9)   | F3_3 C2_3 F2_3 | 107.6 (3)   |
| F5_13 C3_13 F6_13 | 108.3 (5)   | F4_3 C3_3 C1_3 | 110.5 (2)   |
| F6_13 C3_13 C1_13 | 112.2 (6)   | F4_3 C3_3 F5_3 | 107.7 (2)   |
| F6_13 C3_13 F4_13 | 108.1 (12)  | F4_3 C3_3 F6_3 | 107.4 (3)   |
| F7_13 C4_13 C1_13 | 110.6 (6)   | F5_3 C3_3 C1_3 | 110.2 (2)   |
| F8_13 C4_13 C1_13 | 111.8 (8)   | F6_3 C3_3 C1_3 | 112.0 (2)   |
| F8_13 C4_13 F7_13 | 108.0 (9)   | F6_3 C3_3 F5_3 | 108.9 (2)   |
| F9_13 C4_13 C1_13 | 110.3 (9)   | F7_3 C4_3 C1_3 | 110.0 (2)   |
| F9_13 C4_13 F7_13 | 108.3 (7)   | F7_3 C4_3 F8_3 | 108.9 (2)   |
| F9_13 C4_13 F8_13 | 107.8 (10)  | F8_3 C4_3 C1_3 | 112.1 (2)   |
| C1_12 O1_12 A12   | 147.78 (17) | F9_3 C4_3 C1_3 | 109.6 (2)   |
| O1_12 C1_12 C2_12 | 112.2 (2)   | F9_3 C4_3 F7_3 | 108.3 (3)   |
| O1_12 C1_12 C3_12 | 109.3 (2)   | F9_3 C4_3 F8_3 | 107.8 (2)   |
| O1_12 C1_12 C4_12 | 107.8 (2)   | C1_2 O1_2 A14  | 146.01 (18) |
| C2_12 C1_12 C3_12 | 108.4 (2)   | O1_2 C1_2 C2_2 | 109.6 (2)   |
| C2_12 C1_12 C4_12 | 108.8 (2)   | O1_2 C1_2 C3_2 | 110.9 (2)   |
| C4_12 C1_12 C3_12 | 110.3 (2)   | O1_2 C1_2 C4_2 | 107.9 (2)   |
| F1_12 C2_12 C1_12 | 109.8 (2)   | C2_2 C1_2 C3_2 | 108.7 (2)   |
| F1_12 C2_12 F2_12 | 108.8 (2)   | C4_2 C1_2 C2_2 | 110.1 (2)   |
| F1_12 C2_12 F3_12 | 106.5 (2)   | C4_2 C1_2 C3_2 | 109.7 (2)   |
| F2_12 C2_12 C1_12 | 112.9 (2)   | F1_2 C2_2 C1_2 | 110.6 (2)   |
| F2_12 C2_12 F3_12 | 107.8 (2)   | F1_2 C2_2 F2_2 | 107.1 (3)   |
| F3_12 C2_12 C1_12 | 110.9 (2)   | F1_2 C2_2 F3_2 | 108.0 (3)   |
| F4_12 C3_12 C1_12 | 111.1 (2)   | F2_2 C2_2 C1_2 | 112.9 (3)   |

|                   |             |                |             |
|-------------------|-------------|----------------|-------------|
| F4_12 C3_12 F5_12 | 107.5 (2)   | F3_2 C2_2 C1_2 | 110.9 (2)   |
| F4_12 C3_12 F6_12 | 107.9 (2)   | F3_2 C2_2 F2_2 | 107.1 (2)   |
| F5_12 C3_12 C1_12 | 110.4 (2)   | F4_2 C3_2 C1_2 | 109.8 (2)   |
| F5_12 C3_12 F6_12 | 107.4 (2)   | F5_2 C3_2 C1_2 | 109.7 (2)   |
| F6_12 C3_12 C1_12 | 112.3 (2)   | F5_2 C3_2 F4_2 | 107.2 (3)   |
| F7_12 C4_12 C1_12 | 111.3 (2)   | F6_2 C3_2 C1_2 | 112.8 (2)   |
| F7_12 C4_12 F8_12 | 106.3 (2)   | F6_2 C3_2 F4_2 | 108.5 (2)   |
| F8_12 C4_12 C1_12 | 112.5 (2)   | F6_2 C3_2 F5_2 | 108.7 (3)   |
| F9_12 C4_12 C1_12 | 110.9 (2)   | F7_2 C4_2 C1_2 | 111.0 (2)   |
| F9_12 C4_12 F7_12 | 108.7 (2)   | F7_2 C4_2 F8_2 | 107.7 (3)   |
| F9_12 C4_12 F8_12 | 107.0 (2)   | F8_2 C4_2 C1_2 | 111.8 (2)   |
| C1_11 O1_11 Al2   | 146.33 (17) | F9_2 C4_2 C1_2 | 110.8 (3)   |
| O1_11 C1_11 C2_11 | 110.4 (2)   | F9_2 C4_2 F7_2 | 107.2 (3)   |
| O1_11 C1_11 C3_11 | 107.5 (2)   | F9_2 C4_2 F8_2 | 108.1 (3)   |
| O1_11 C1_11 C4_11 | 111.1 (2)   | C1_1 O1_1 Al4  | 149.89 (17) |
| C2_11 C1_11 C3_11 | 109.8 (2)   | O1_1 C1_1 C2_1 | 110.9 (2)   |
| C2_11 C1_11 C4_11 | 108.9 (2)   | O1_1 C1_1 C3_1 | 110.4 (2)   |
| C3_11 C1_11 C4_11 | 109.1 (2)   | O1_1 C1_1 C4_1 | 107.5 (2)   |
| F1_11 C2_11 C1_11 | 109.8 (2)   | C2_1 C1_1 C4_1 | 109.3 (2)   |
| F1_11 C2_11 F2_11 | 107.9 (2)   | C3_1 C1_1 C2_1 | 109.2 (2)   |
| F1_11 C2_11 F3_11 | 108.0 (2)   | C3_1 C1_1 C4_1 | 109.5 (2)   |
| F2_11 C2_11 C1_11 | 112.6 (2)   | F1_1 C2_1 C1_1 | 110.1 (2)   |
| F2_11 C2_11 F3_11 | 107.2 (2)   | F2_1 C2_1 C1_1 | 112.4 (2)   |
| F3_11 C2_11 C1_11 | 111.2 (2)   | F2_1 C2_1 F1_1 | 107.5 (2)   |
| F4_11 C3_11 C1_11 | 110.7 (2)   | F3_1 C2_1 C1_1 | 111.2 (2)   |
| F5_11 C3_11 C1_11 | 110.8 (2)   | F3_1 C2_1 F1_1 | 107.2 (2)   |
| F5_11 C3_11 F4_11 | 106.4 (2)   | F3_1 C2_1 F2_1 | 108.2 (2)   |
| F6_11 C3_11 C1_11 | 112.8 (2)   | F4_1 C3_1 C1_1 | 111.0 (2)   |
| F6_11 C3_11 F4_11 | 108.0 (2)   | F4_1 C3_1 F6_1 | 107.0 (2)   |
| F6_11 C3_11 F5_11 | 107.9 (2)   | F5_1 C3_1 C1_1 | 111.2 (2)   |
| F7_11 C4_11 C1_11 | 110.2 (2)   | F5_1 C3_1 F4_1 | 108.2 (2)   |
| F7_11 C4_11 F8_11 | 108.6 (2)   | F5_1 C3_1 F6_1 | 107.5 (2)   |
| F7_11 C4_11 F9_11 | 107.3 (2)   | F6_1 C3_1 C1_1 | 111.8 (2)   |
| F8_11 C4_11 C1_11 | 112.1 (2)   | F7_1 C4_1 C1_1 | 111.7 (2)   |
| F8_11 C4_11 F9_11 | 107.3 (2)   | F7_1 C4_1 F8_1 | 107.7 (2)   |
| F9_11 C4_11 C1_11 | 111.1 (2)   | F7_1 C4_1 F9_1 | 107.9 (2)   |
| C1_10 O1_10 Al2   | 151.62 (17) | F8_1 C4_1 C1_1 | 111.9 (2)   |
| O1_10 C1_10 C2_10 | 110.2 (2)   | F9_1 C4_1 C1_1 | 110.9 (2)   |
| O1_10 C1_10 C3_10 | 109.0 (2)   | F9_1 C4_1 F8_1 | 106.5 (2)   |

<sup>1</sup>I-X,2-Y,2-Z; <sup>2</sup>I-X,2-Y,1-Z

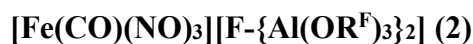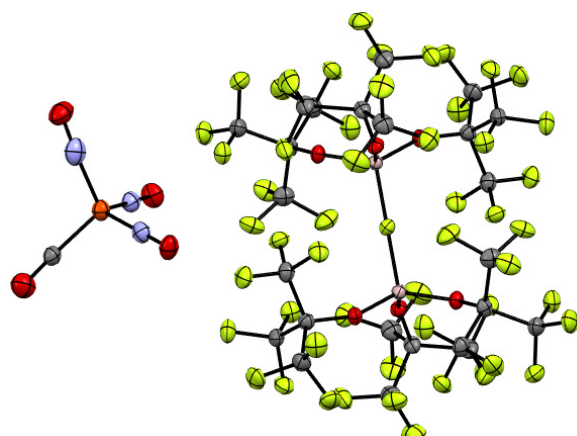

**Table 1 Crystal data and structure refinement for p-1\_b\_a.**

|                                             |                                                                                   |
|---------------------------------------------|-----------------------------------------------------------------------------------|
| Identification code                         | p-1_b_a                                                                           |
| Empirical formula                           | C <sub>25</sub> N <sub>3</sub> O <sub>10</sub> F <sub>55</sub> Al <sub>2</sub> Fe |
| Formula weight                              | 1657.09                                                                           |
| Temperature/K                               | 100.0                                                                             |
| Crystal system                              | triclinic                                                                         |
| Space group                                 | P-1                                                                               |
| a/Å                                         | 10.6555(2)                                                                        |
| b/Å                                         | 12.7849(2)                                                                        |
| c/Å                                         | 20.0830(4)                                                                        |
| α/°                                         | 74.6740(10)                                                                       |
| β/°                                         | 85.0720(10)                                                                       |
| γ/°                                         | 65.5470(10)                                                                       |
| Volume/Å <sup>3</sup>                       | 2401.06(8)                                                                        |
| Z                                           | 2                                                                                 |
| ρ <sub>calc</sub> /cm <sup>3</sup>          | 2.292                                                                             |
| μ/mm <sup>-1</sup>                          | 0.621                                                                             |
| F(000)                                      | 1596.0                                                                            |
| Crystal size/mm <sup>3</sup>                | 0.15 × 0.1 × 0.1                                                                  |
| Radiation                                   | MoKα (λ = 0.71073)                                                                |
| 2θ range for data collection/°              | 2.104 to 52.736                                                                   |
| Index ranges                                | -13 ≤ h ≤ 12, -15 ≤ k ≤ 15, -25 ≤ l ≤ 25                                          |
| Reflections collected                       | 42788                                                                             |
| Independent reflections                     | 9775 [R <sub>int</sub> = 0.0313, R <sub>sigma</sub> = 0.0364]                     |
| Data/restraints/parameters                  | 9775/1842/869                                                                     |
| Goodness-of-fit on F <sup>2</sup>           | 1.025                                                                             |
| Final R indexes [I ≥ 2σ (I)]                | R <sub>1</sub> = 0.0429, wR <sub>2</sub> = 0.0978                                 |
| Final R indexes [all data]                  | R <sub>1</sub> = 0.0642, wR <sub>2</sub> = 0.1069                                 |
| Largest diff. peak/hole / e Å <sup>-3</sup> | 0.69/-0.28                                                                        |

**Table 2 Fractional Atomic Coordinates ( $\times 10^4$ ) and Equivalent Isotropic Displacement Parameters ( $\text{\AA}^2 \times 10^3$ ) for p-1\_b\_a.  $U_{eq}$  is defined as 1/3 of the trace of the orthogonalised  $U_{ij}$  tensor.**

| Atom | x            | y            | z            | U(eq)      |
|------|--------------|--------------|--------------|------------|
| Al2  | 757.5 (8)    | 8603.4 (7)   | -192.9 (4)   | 17.74 (17) |
| O2   | 6827 (2)     | 7014 (2)     | 8012.6 (11)  | 37.8 (5)   |
| N2   | 7888 (3)     | 6776 (2)     | 7783.3 (12)  | 30.1 (6)   |
| F2   | 0            | 10000        | 0            | 22.7 (5)   |
| N4   | 9591 (3)     | 7813 (3)     | 6984.5 (14)  | 42.6 (7)   |
| O4   | 11741 (3)    | 4893 (2)     | 8392.9 (12)  | 47.5 (6)   |
| O3   | 9607 (3)     | 8716 (2)     | 6716.9 (12)  | 48.4 (6)   |
| Al1  | 5521.5 (8)   | 3432.7 (6)   | 5300.4 (4)   | 17.89 (17) |
| C1   | 10863 (3)    | 5511 (2)     | 8011.0 (14)  | 26.3 (6)   |
| Fe1  | 9452.2 (4)   | 6435.8 (4)   | 7386.9 (2)   | 28.45 (11) |
| O1   | 9606 (2)     | 5099.0 (19)  | 6420.1 (11)  | 36.4 (5)   |
| N1   | 9574 (2)     | 5633 (2)     | 6795.2 (13)  | 29.5 (5)   |
| F1   | 5000         | 5000         | 5000         | 20.4 (4)   |
| O1_6 | -538 (2)     | 8307.3 (19)  | -412.3 (11)  | 33.3 (5)   |
| C1_6 | -1814 (3)    | 8324 (2)     | -363.7 (14)  | 26.1 (6)   |
| C2_6 | -1700 (3)    | 7066 (3)     | -334.9 (15)  | 28.9 (6)   |
| F1_6 | -828.4 (17)  | 6607.0 (14)  | -799.6 (9)   | 34.5 (4)   |
| F2_6 | -2903.8 (18) | 7059.1 (15)  | -456.4 (10)  | 39.1 (4)   |
| F3_6 | -1223 (2)    | 6332.7 (16)  | 278.6 (9)    | 45.8 (5)   |
| C3_6 | -2522 (3)    | 8699 (3)     | 299.7 (15)   | 32.0 (7)   |
| F4_6 | -2946.7 (18) | 9868.0 (16)  | 206.7 (9)    | 40.7 (4)   |
| F5_6 | -1617 (2)    | 8168.5 (19)  | 825.9 (9)    | 50.4 (5)   |
| F6_6 | -3593.5 (19) | 8426.1 (17)  | 471.3 (10)   | 44.6 (5)   |
| C4_6 | -2690 (3)    | 9225 (3)     | -1009.7 (15) | 33.1 (7)   |
| F7_6 | -2462 (2)    | 10204.1 (15) | -1167.9 (10) | 44.9 (5)   |
| F8_6 | -4032.6 (18) | 9529.8 (16)  | -925.6 (10)  | 44.7 (5)   |
| F9_6 | -2350 (2)    | 8764.9 (15)  | -1561.0 (9)  | 40.2 (4)   |
| O1_5 | 1825.4 (19)  | 8726.1 (16)  | -858.6 (9)   | 24.6 (4)   |
| C1_5 | 2112 (3)     | 8800 (2)     | -1536.6 (13) | 21.2 (6)   |
| C2_5 | 922 (3)      | 9838 (2)     | -2007.3 (14) | 28.9 (6)   |
| F1_5 | -114.9 (16)  | 9526.8 (16)  | -2052.4 (9)  | 35.9 (4)   |
| F2_5 | 1331.1 (18)  | 10154.6 (15) | -2643.2 (9)  | 39.2 (4)   |
| F3_5 | 423.0 (19)   | 10771.0 (15) | -1743.0 (10) | 44.4 (5)   |
| C3_5 | 3448 (3)     | 9013 (2)     | -1673.7 (13) | 24.1 (6)   |
| F4_5 | 4391.3 (16)  | 8312.8 (15)  | -1178.0 (8)  | 32.9 (4)   |
| F5_5 | 3205.0 (17)  | 10131.4 (14) | -1694.8 (8)  | 31.8 (4)   |
| F6_5 | 4000.4 (16)  | 8797.3 (15)  | -2272.7 (8)  | 30.8 (4)   |
| C4_5 | 2344 (3)     | 7616 (2)     | -1710.9 (14) | 26.0 (6)   |
| F7_5 | 3569.3 (17)  | 6767.0 (14)  | -1477.7 (9)  | 35.2 (4)   |
| F8_5 | 2262.7 (17)  | 7731.6 (15)  | -2387.7 (8)  | 31.7 (4)   |
| F9_5 | 1392.4 (18)  | 7232.5 (15)  | -1415.4 (9)  | 34.5 (4)   |
| O1_4 | 1619 (2)     | 7750.8 (16)  | 570.9 (9)    | 28.0 (4)   |
| C1_4 | 2612 (3)     | 6703 (2)     | 896.4 (13)   | 24.6 (6)   |
| C2_4 | 2558 (3)     | 5659 (2)     | 654.6 (15)   | 30.5 (7)   |
| F1_4 | 1510.7 (19)  | 5396.5 (15)  | 941.7 (10)   | 42.6 (5)   |
| F2_4 | 3704.7 (17)  | 4673.9 (13)  | 819.0 (9)    | 34.7 (4)   |
| F3_4 | 2343 (2)     | 5962.8 (15)  | -23.9 (9)    | 45.0 (5)   |
| C3_4 | 4049 (3)     | 6724 (3)     | 744.5 (17)   | 38.0 (7)   |
| F4_4 | 4033 (2)     | 7748.2 (17)  | 773.8 (14)   | 62.8 (6)   |
| F5_4 | 4436 (2)     | 6565.1 (17)  | 119.5 (11)   | 52.9 (5)   |
| F6_4 | 5022.8 (19)  | 5872.5 (17)  | 1196.0 (11)  | 53.1 (6)   |
| C4_4 | 2344 (3)     | 6521 (3)     | 1678.2 (14)  | 34.1 (7)   |
| F7_4 | 2649 (2)     | 7248.1 (16)  | 1930.0 (9)   | 50.0 (5)   |
| F8_4 | 3095 (2)     | 5408.7 (15)  | 2030.1 (9)   | 54.2 (6)   |
| F9_4 | 1031 (2)     | 6740.6 (16)  | 1807.6 (9)   | 46.8 (5)   |
| O1_3 | 4830.9 (18)  | 2991.9 (15)  | 4747.7 (9)   | 21.6 (4)   |
| C1_3 | 4983 (3)     | 2584 (2)     | 4171.8 (13)  | 22.3 (6)   |
| C2_3 | 4733 (3)     | 3622 (2)     | 3521.8 (14)  | 30.1 (6)   |
| F1_3 | 3387.9 (17)  | 4323.1 (14)  | 3432.9 (8)   | 33.7 (4)   |
| F2_3 | 5159.3 (18)  | 3258.0 (15)  | 2945.5 (8)   | 35.9 (4)   |
| F3_3 | 5377.4 (19)  | 4278.7 (15)  | 3592.4 (9)   | 39.6 (4)   |
| C3_3 | 6440 (3)     | 1582 (2)     | 4156.3 (14)  | 27.8 (6)   |
| F4_3 | 6834.4 (17)  | 859.6 (14)   | 4782.9 (8)   | 33.6 (4)   |

|      |              |             |             |          |
|------|--------------|-------------|-------------|----------|
| F5_3 | 7376.0 (17)  | 2038.0 (15) | 3958.2 (9)  | 35.8 (4) |
| F6_3 | 6492.6 (18)  | 932.5 (14)  | 3725.4 (9)  | 37.2 (4) |
| C4_3 | 3874 (3)     | 2072 (2)    | 4182.5 (14) | 28.9 (6) |
| F7_3 | 4239.2 (19)  | 1016.9 (14) | 4615.7 (9)  | 37.6 (4) |
| F8_3 | 3687.9 (18)  | 1963.8 (15) | 3554.5 (8)  | 37.3 (4) |
| F9_3 | 2667.4 (16)  | 2779.2 (14) | 4373.6 (8)  | 32.4 (4) |
| O1_2 | 4760.2 (18)  | 3287.2 (15) | 6084.9 (9)  | 21.2 (4) |
| C1_2 | 4388 (3)     | 2529 (2)    | 6588.5 (13) | 23.6 (6) |
| C2_2 | 3231 (3)     | 2293 (3)    | 6322.0 (15) | 30.9 (7) |
| F1_2 | 2318.0 (17)  | 3282.6 (15) | 5925.9 (9)  | 37.1 (4) |
| F2_2 | 2553.4 (18)  | 1864.1 (16) | 6833.8 (9)  | 40.3 (4) |
| F3_2 | 3756 (2)     | 1510.9 (16) | 5935.5 (9)  | 41.4 (4) |
| C3_2 | 5636 (3)     | 1327 (3)    | 6850.0 (15) | 32.0 (7) |
| F4_2 | 6463.3 (17)  | 1422.6 (15) | 7271.4 (9)  | 38.3 (4) |
| F5_2 | 6382.6 (18)  | 987.5 (14)  | 6314.3 (9)  | 36.3 (4) |
| F6_2 | 5261.7 (18)  | 455.7 (14)  | 7184.7 (9)  | 39.7 (4) |
| C4_2 | 3848 (3)     | 3121 (3)    | 7197.3 (15) | 32.9 (7) |
| F7_2 | 4659.9 (19)  | 3589.6 (15) | 7335.4 (8)  | 36.6 (4) |
| F8_2 | 3734 (2)     | 2359.2 (17) | 7775.5 (8)  | 42.4 (5) |
| F9_2 | 2586.7 (19)  | 4006.8 (16) | 7034.2 (9)  | 44.1 (5) |
| O1_1 | 7277.8 (17)  | 2827.8 (15) | 5281.3 (9)  | 21.1 (4) |
| C1_1 | 8503 (3)     | 2776 (2)    | 5463.0 (13) | 21.8 (6) |
| C2_1 | 8678 (3)     | 3912 (2)    | 5051.3 (14) | 26.3 (6) |
| F1_1 | 8283.5 (17)  | 4181.1 (14) | 4394.4 (8)  | 32.6 (4) |
| F2_1 | 9975.2 (16)  | 3805.5 (15) | 5061.7 (9)  | 33.3 (4) |
| F3_1 | 7891.0 (17)  | 4832.0 (13) | 5307.8 (8)  | 30.6 (4) |
| C3_1 | 8575 (3)     | 2657 (2)    | 6252.0 (14) | 24.3 (6) |
| F4_1 | 8794.1 (17)  | 1557.3 (14) | 6609.8 (8)  | 31.5 (4) |
| F5_1 | 7391.1 (16)  | 3382.3 (14) | 6451.7 (8)  | 29.6 (4) |
| F6_1 | 9578.4 (17)  | 2911.7 (15) | 6424.3 (8)  | 33.3 (4) |
| C4_1 | 9685 (3)     | 1674 (2)    | 5286.8 (15) | 28.6 (6) |
| F7_1 | 9366.3 (18)  | 736.8 (14)  | 5474.8 (9)  | 36.6 (4) |
| F8_1 | 10872.8 (16) | 1389.0 (15) | 5602.4 (9)  | 37.4 (4) |
| F9_1 | 9888.0 (18)  | 1864.1 (15) | 4607.8 (9)  | 37.7 (4) |

**Table 3 Bond Lengths for p-1\_b\_a.**

| Atom Atom | Length/Å   | Atom Atom | Length/Å    |
|-----------|------------|-----------|-------------|
| Al2 F2    | 1.7631 (7) | C3_4 F5_4 | 1.328 (4)   |
| O2 N2     | 1.133 (3)  | C3_4 F6_4 | 1.337 (3)   |
| N2 Fe1    | 1.719 (3)  | C4_4 F7_4 | 1.324 (3)   |
| N4 O3     | 1.143 (4)  | C4_4 F8_4 | 1.336 (3)   |
| N4 Fe1    | 1.794 (3)  | C4_4 F9_4 | 1.325 (4)   |
| O4 C1     | 1.131 (3)  | O1_3 Al1  | 1.7046 (18) |
| Al1 F1    | 1.7846 (7) | O1_3 C1_3 | 1.361 (3)   |
| C1 Fe1    | 1.816 (3)  | C1_3 C2_3 | 1.545 (4)   |
| Fe1 N1    | 1.729 (2)  | C1_3 C3_3 | 1.555 (4)   |
| O1 N1     | 1.133 (3)  | C1_3 C4_3 | 1.566 (4)   |
| O1_6 Al2  | 1.693 (2)  | C2_3 F1_3 | 1.336 (3)   |
| O1_6 C1_6 | 1.347 (3)  | C2_3 F2_3 | 1.335 (3)   |
| C1_6 C2_6 | 1.548 (4)  | C2_3 F3_3 | 1.324 (3)   |
| C1_6 C3_6 | 1.562 (4)  | C3_3 F4_3 | 1.330 (3)   |
| C1_6 C4_6 | 1.552 (4)  | C3_3 F5_3 | 1.335 (3)   |
| C2_6 F1_6 | 1.329 (3)  | C3_3 F6_3 | 1.333 (3)   |
| C2_6 F2_6 | 1.330 (3)  | C4_3 F7_3 | 1.316 (3)   |
| C2_6 F3_6 | 1.326 (3)  | C4_3 F8_3 | 1.344 (3)   |
| C3_6 F4_6 | 1.335 (3)  | C4_3 F9_3 | 1.325 (3)   |
| C3_6 F5_6 | 1.327 (3)  | O1_2 Al1  | 1.7103 (19) |
| C3_6 F6_6 | 1.320 (3)  | O1_2 C1_2 | 1.361 (3)   |
| C4_6 F7_6 | 1.325 (3)  | C1_2 C2_2 | 1.550 (4)   |
| C4_6 F8_6 | 1.326 (3)  | C1_2 C3_2 | 1.551 (4)   |
| C4_6 F9_6 | 1.342 (3)  | C1_2 C4_2 | 1.552 (4)   |
| O1_5 Al2  | 1.698 (2)  | C2_2 F1_2 | 1.327 (3)   |
| O1_5 C1_5 | 1.357 (3)  | C2_2 F2_2 | 1.335 (3)   |
| C1_5 C2_5 | 1.553 (4)  | C2_2 F3_2 | 1.337 (3)   |
| C1_5 C3_5 | 1.547 (4)  | C3_2 F4_2 | 1.334 (3)   |
| C1_5 C4_5 | 1.558 (4)  | C3_2 F5_2 | 1.339 (3)   |



|           |             |           |             |
|-----------|-------------|-----------|-------------|
| C2_5 F1_5 | 1.337 (3)   | C3_2 F6_2 | 1.333 (3)   |
| C2_5 F2_5 | 1.327 (3)   | C4_2 F7_2 | 1.320 (3)   |
| C2_5 F3_5 | 1.322 (3)   | C4_2 F8_2 | 1.337 (3)   |
| C3_5 F4_5 | 1.326 (3)   | C4_2 F9_2 | 1.347 (3)   |
| C3_5 F5_5 | 1.333 (3)   | O1_1 All  | 1.7050 (19) |
| C3_5 F6_5 | 1.338 (3)   | O1_1 C1_1 | 1.356 (3)   |
| C4_5 F7_5 | 1.329 (3)   | C1_1 C2_1 | 1.546 (4)   |
| C4_5 F8_5 | 1.334 (3)   | C1_1 C3_1 | 1.557 (4)   |
| C4_5 F9_5 | 1.333 (3)   | C1_1 C4_1 | 1.553 (4)   |
| O1_4 Al2  | 1.7068 (19) | C2_1 F1_1 | 1.331 (3)   |
| O1_4 C1_4 | 1.351 (3)   | C2_1 F2_1 | 1.334 (3)   |
| C1_4 C2_4 | 1.560 (4)   | C2_1 F3_1 | 1.335 (3)   |
| C1_4 C3_4 | 1.545 (4)   | C3_1 F4_1 | 1.330 (3)   |
| C1_4 C4_4 | 1.545 (4)   | C3_1 F5_1 | 1.324 (3)   |
| C2_4 F1_4 | 1.337 (3)   | C3_1 F6_1 | 1.335 (3)   |
| C2_4 F2_4 | 1.328 (3)   | C4_1 F7_1 | 1.330 (3)   |
| C2_4 F3_4 | 1.327 (3)   | C4_1 F8_1 | 1.331 (3)   |
| C3_4 F4_4 | 1.320 (3)   | C4_1 F9_1 | 1.335 (3)   |

**Table 4 Bond Angles for p-1\_b\_a.**

| Atom Atom Atom          | Angle/°     | Atom Atom Atom | Angle/°     |
|-------------------------|-------------|----------------|-------------|
| O1_6 Al2 F2             | 107.31 (8)  | F4_4 C3_4 C1_4 | 110.8 (2)   |
| O1_6 Al2 O1_5           | 112.02 (10) | F4_4 C3_4 F5_4 | 108.5 (3)   |
| O1_6 Al2 O1_4           | 116.60 (11) | F4_4 C3_4 F6_4 | 107.1 (3)   |
| O1_5 Al2 F2             | 106.54 (7)  | F5_4 C3_4 C1_4 | 110.4 (2)   |
| O1_5 Al2 O1_4           | 113.12 (10) | F5_4 C3_4 F6_4 | 107.4 (2)   |
| O1_4 Al2 F2             | 99.83 (7)   | F6_4 C3_4 C1_4 | 112.5 (3)   |
| O2 N2 Fe1               | 176.5 (2)   | F7_4 C4_4 C1_4 | 110.9 (3)   |
| Al2 <sup>1</sup> F2 Al2 | 180.0       | F7_4 C4_4 F8_4 | 108.1 (2)   |
| O3 N4 Fe1               | 176.3 (3)   | F7_4 C4_4 F9_4 | 107.1 (2)   |
| O1_3 All F1             | 107.96 (7)  | F8_4 C4_4 C1_4 | 111.6 (2)   |
| O1_3 All O1_2           | 110.14 (9)  | F9_4 C4_4 C1_4 | 111.5 (2)   |
| O1_3 All O1_1           | 111.03 (9)  | F9_4 C4_4 F8_4 | 107.4 (3)   |
| O1_2 All F1             | 102.71 (7)  | C1_3 O1_3 All  | 147.78 (18) |
| O1_1 All F1             | 105.80 (7)  | O1_3 C1_3 C2_3 | 109.6 (2)   |
| O1_1 All O1_2           | 118.32 (9)  | O1_3 C1_3 C3_3 | 111.5 (2)   |
| O4 C1 Fe1               | 176.9 (3)   | O1_3 C1_3 C4_3 | 107.8 (2)   |
| N2 Fe1 N4               | 107.14 (12) | C2_3 C1_3 C3_3 | 110.0 (2)   |
| N2 Fe1 C1               | 110.96 (12) | C2_3 C1_3 C4_3 | 109.2 (2)   |
| N2 Fe1 N1               | 110.72 (11) | C3_3 C1_3 C4_3 | 108.8 (2)   |
| N4 Fe1 C1               | 109.75 (13) | F1_3 C2_3 C1_3 | 110.1 (2)   |
| N1 Fe1 N4               | 111.82 (12) | F2_3 C2_3 C1_3 | 112.9 (2)   |
| N1 Fe1 C1               | 106.50 (11) | F2_3 C2_3 F1_3 | 107.4 (2)   |
| O1 N1 Fe1               | 177.0 (2)   | F3_3 C2_3 C1_3 | 110.3 (2)   |
| All <sup>2</sup> F1 All | 180.0       | F3_3 C2_3 F1_3 | 107.6 (2)   |
| C1_6 O1_6 Al2           | 154.26 (18) | F3_3 C2_3 F2_3 | 108.3 (2)   |
| O1_6 C1_6 C2_6          | 108.6 (2)   | F4_3 C3_3 C1_3 | 110.6 (2)   |
| O1_6 C1_6 C3_6          | 110.9 (2)   | F4_3 C3_3 F5_3 | 106.9 (2)   |
| O1_6 C1_6 C4_6          | 108.9 (2)   | F4_3 C3_3 F6_3 | 108.2 (2)   |
| C2_6 C1_6 C3_6          | 109.5 (2)   | F5_3 C3_3 C1_3 | 110.7 (2)   |
| C2_6 C1_6 C4_6          | 109.7 (2)   | F6_3 C3_3 C1_3 | 112.7 (2)   |
| C4_6 C1_6 C3_6          | 109.2 (2)   | F6_3 C3_3 F5_3 | 107.5 (2)   |
| F1_6 C2_6 C1_6          | 111.0 (2)   | F7_3 C4_3 C1_3 | 111.4 (2)   |
| F1_6 C2_6 F2_6          | 107.4 (2)   | F7_3 C4_3 F8_3 | 107.7 (2)   |
| F2_6 C2_6 C1_6          | 112.6 (2)   | F7_3 C4_3 F9_3 | 107.9 (2)   |
| F3_6 C2_6 C1_6          | 110.9 (2)   | F8_3 C4_3 C1_3 | 111.3 (2)   |
| F3_6 C2_6 F1_6          | 106.9 (2)   | F9_3 C4_3 C1_3 | 110.9 (2)   |
| F3_6 C2_6 F2_6          | 107.8 (2)   | F9_3 C4_3 F8_3 | 107.6 (2)   |
| F4_6 C3_6 C1_6          | 110.1 (2)   | C1_2 O1_2 All  | 143.62 (17) |
| F5_6 C3_6 C1_6          | 109.6 (2)   | O1_2 C1_2 C2_2 | 110.9 (2)   |
| F5_6 C3_6 F4_6          | 107.4 (2)   | O1_2 C1_2 C3_2 | 111.2 (2)   |
| F6_6 C3_6 C1_6          | 113.0 (2)   | O1_2 C1_2 C4_2 | 107.5 (2)   |
| F6_6 C3_6 F4_6          | 108.3 (2)   | C2_2 C1_2 C3_2 | 109.0 (2)   |
| F6_6 C3_6 F5_6          | 108.4 (3)   | C2_2 C1_2 C4_2 | 109.3 (2)   |
| F7_6 C4_6 C1_6          | 110.8 (2)   | C3_2 C1_2 C4_2 | 108.9 (2)   |
| F7_6 C4_6 F8_6          | 108.2 (2)   | F1_2 C2_2 C1_2 | 110.9 (2)   |

|                |            |                |            |
|----------------|------------|----------------|------------|
| F7_6 C4_6 F9_6 | 106.9(2)   | F1_2 C2_2 F2_2 | 107.9(2)   |
| F8_6 C4_6 C1_6 | 112.7(2)   | F1_2 C2_2 F3_2 | 107.0(2)   |
| F8_6 C4_6 F9_6 | 107.2(2)   | F2_2 C2_2 C1_2 | 112.6(2)   |
| F9_6 C4_6 C1_6 | 110.6(2)   | F2_2 C2_2 F3_2 | 107.7(2)   |
| C1_5 O1_5 A12  | 149.70(17) | F3_2 C2_2 C1_2 | 110.5(2)   |
| O1_5 C1_5 C2_5 | 111.3(2)   | F4_2 C3_2 C1_2 | 111.1(2)   |
| O1_5 C1_5 C3_5 | 107.9(2)   | F4_2 C3_2 F5_2 | 107.5(2)   |
| O1_5 C1_5 C4_5 | 110.1(2)   | F5_2 C3_2 C1_2 | 109.8(2)   |
| C2_5 C1_5 C4_5 | 109.0(2)   | F6_2 C3_2 C1_2 | 112.9(2)   |
| C3_5 C1_5 C2_5 | 109.3(2)   | F6_2 C3_2 F4_2 | 108.0(2)   |
| C3_5 C1_5 C4_5 | 109.2(2)   | F6_2 C3_2 F5_2 | 107.3(2)   |
| F1_5 C2_5 C1_5 | 110.5(2)   | F7_2 C4_2 C1_2 | 111.5(2)   |
| F2_5 C2_5 C1_5 | 112.1(2)   | F7_2 C4_2 F8_2 | 108.1(2)   |
| F2_5 C2_5 F1_5 | 107.8(2)   | F7_2 C4_2 F9_2 | 107.3(2)   |
| F3_5 C2_5 C1_5 | 110.3(2)   | F8_2 C4_2 C1_2 | 112.5(2)   |
| F3_5 C2_5 F1_5 | 107.2(2)   | F8_2 C4_2 F9_2 | 107.3(2)   |
| F3_5 C2_5 F2_5 | 108.9(2)   | F9_2 C4_2 C1_2 | 110.0(2)   |
| F4_5 C3_5 C1_5 | 110.9(2)   | C1_1 O1_1 All  | 149.47(16) |
| F4_5 C3_5 F5_5 | 107.5(2)   | O1_1 C1_1 C2_1 | 109.3(2)   |
| F4_5 C3_5 F6_5 | 107.5(2)   | O1_1 C1_1 C3_1 | 110.6(2)   |
| F5_5 C3_5 C1_5 | 111.0(2)   | O1_1 C1_1 C4_1 | 108.9(2)   |
| F5_5 C3_5 F6_5 | 107.8(2)   | C2_1 C1_1 C3_1 | 109.9(2)   |
| F6_5 C3_5 C1_5 | 111.8(2)   | C2_1 C1_1 C4_1 | 109.3(2)   |
| F7_5 C4_5 C1_5 | 111.5(2)   | C4_1 C1_1 C3_1 | 108.8(2)   |
| F7_5 C4_5 F8_5 | 107.7(2)   | F1_1 C2_1 C1_1 | 110.3(2)   |
| F7_5 C4_5 F9_5 | 107.3(2)   | F1_1 C2_1 F2_1 | 107.8(2)   |
| F8_5 C4_5 C1_5 | 112.8(2)   | F1_1 C2_1 F3_1 | 107.5(2)   |
| F9_5 C4_5 C1_5 | 110.3(2)   | F2_1 C2_1 C1_1 | 112.9(2)   |
| F9_5 C4_5 F8_5 | 107.1(2)   | F2_1 C2_1 F3_1 | 107.6(2)   |
| C1_4 O1_4 A12  | 145.84(17) | F3_1 C2_1 C1_1 | 110.5(2)   |
| O1_4 C1_4 C2_4 | 110.9(2)   | F4_1 C3_1 C1_1 | 110.6(2)   |
| O1_4 C1_4 C3_4 | 110.2(2)   | F4_1 C3_1 F6_1 | 107.8(2)   |
| O1_4 C1_4 C4_4 | 107.4(2)   | F5_1 C3_1 C1_1 | 110.2(2)   |
| C3_4 C1_4 C2_4 | 108.9(2)   | F5_1 C3_1 F4_1 | 107.5(2)   |
| C4_4 C1_4 C2_4 | 109.2(2)   | F5_1 C3_1 F6_1 | 108.1(2)   |
| C4_4 C1_4 C3_4 | 110.3(2)   | F6_1 C3_1 C1_1 | 112.5(2)   |
| F1_4 C2_4 C1_4 | 110.8(2)   | F7_1 C4_1 C1_1 | 110.5(2)   |
| F2_4 C2_4 C1_4 | 112.7(2)   | F7_1 C4_1 F8_1 | 107.9(2)   |
| F2_4 C2_4 F1_4 | 107.4(2)   | F7_1 C4_1 F9_1 | 107.0(2)   |
| F3_4 C2_4 C1_4 | 110.4(2)   | F8_1 C4_1 C1_1 | 112.3(2)   |
| F3_4 C2_4 F1_4 | 106.7(2)   | F8_1 C4_1 F9_1 | 108.0(2)   |
| F3_4 C2_4 F2_4 | 108.7(2)   | F9_1 C4_1 C1_1 | 111.0(2)   |

<sup>1</sup>-X,<sub>2</sub>-Y,-Z; <sup>2</sup>1-X,<sub>1</sub>-Y,<sub>1</sub>-Z

## 9. Additional Information on the DFT Calculations

[Fe(CO)<sub>4</sub>(NO)]<sup>+</sup> (C<sub>2v</sub> symmetry @BP86-D3BJ/def2-TZVPP) (NO equatorial)

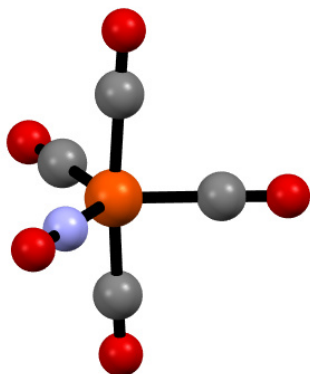

```
$coord
  0.0000000000000000    0.0000000000000000    0.27479613354455    fe
  0.0000000000000000    0.0000000000000000    3.48398769196612    n
  0.0000000000000000    2.94228614034336    -1.61459763624478    c
  0.0000000000000000   -2.94228614034336    -1.61459763624478    c
 -3.47774300540012    0.0000000000000000    -0.06093235219592    c
  3.47774300540012    0.0000000000000000    -0.06093235219592    c
  0.0000000000000000    0.0000000000000000    5.63767868552586    o
  0.0000000000000000    4.79044551236631    -2.71822270661679    o
  0.0000000000000000   -4.79044551236631    -2.71822270661679    o
 -5.61254415599535    0.0000000000000000    -0.30447856046077    o
  5.61254415599535    0.0000000000000000    -0.30447856046077    o
$end
```

```
$vibrational spectrum
# mode      symmetry      wave number      IR intensity      selection rules
#           #           cm** (-1)        km/mol           IR      RAMAN
  1          -0.00          0.00000          -      -
  2          -0.00          0.00000          -      -
  3          0.00          0.00000          -      -
  4          0.00          0.00000          -      -
  5          0.00          0.00000          -      -
  6          0.00          0.00000          -      -
  7          a1          53.43           0.00008          YES     YES
  8          b2          59.01           0.00715          YES     YES
  9          b1          90.99           0.00039          YES     YES
 10         a2          96.16           0.00000          NO      YES
 11         b2          96.87           0.31360          YES     YES
 12         b1         101.32          0.72918          YES     YES
 13         a1         104.97          0.51102          YES     YES
 14         b2         330.70          0.00284          YES     YES
 15         b1         339.54          0.25727          YES     YES
 16         a2         358.81          0.00000          NO      YES
 17         a1         398.79          3.82138          YES     YES
 18         a1         408.84          0.87373          YES     YES
 19         a1         414.57          0.00137          YES     YES
```

|    |    |         |           |     |     |
|----|----|---------|-----------|-----|-----|
| 20 | b2 | 424.83  | 14.26280  | YES | YES |
| 21 | b1 | 449.41  | 8.71662   | YES | YES |
| 22 | b2 | 514.34  | 4.39916   | YES | YES |
| 23 | b1 | 522.17  | 1.51767   | YES | YES |
| 24 | a1 | 523.78  | 10.23997  | YES | YES |
| 25 | a2 | 532.53  | 0.00000   | NO  | YES |
| 26 | b1 | 624.68  | 111.56695 | YES | YES |
| 27 | a1 | 641.93  | 95.26997  | YES | YES |
| 28 | b2 | 646.80  | 113.49697 | YES | YES |
| 29 | a1 | 1941.25 | 883.68741 | YES | YES |
| 30 | b2 | 2095.69 | 680.65338 | YES | YES |
| 31 | b1 | 2114.27 | 763.42678 | YES | YES |
| 32 | a1 | 2114.31 | 100.05333 | YES | YES |
| 33 | a1 | 2167.74 | 42.90675  | YES | YES |

\$end

**[Fe(CO)<sub>4</sub>(NO)]<sup>+</sup> (C<sub>3v</sub> symmetry @BP86-D3BJ/def2-TZVPP) (NO axial)**

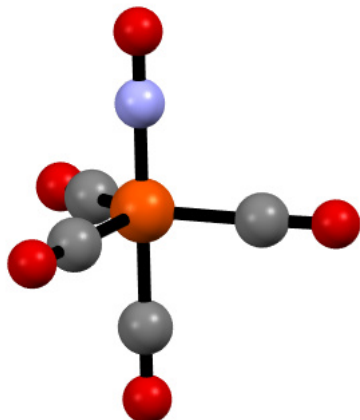

```

$coord
  0.0000000000000000    0.0000000000000000    0.25078955674978    fe
  1.74129538649716   -3.01601208039834   -0.04846088545601    c
  1.74129538649716    3.01601208039834   -0.04846088545601    c
  0.0000000000000000    0.0000000000000000    3.44996681051303    n
 -0.0000000000000000    0.0000000000000000   -3.23326551166298    c
 -3.48259077299430    0.0000000000000000   -0.04846088545601    c
  0.0000000000000000    0.0000000000000000   -5.38453712056163    o
  0.0000000000000000    0.0000000000000000    5.59935191883626    o
 -5.63116012160138    0.0000000000000000   -0.17897433250214    o
  2.81558006080070   -4.87672771808467   -0.17897433250214    o
  2.81558006080070    4.87672771808467   -0.17897433250214    o
  
```

```

$vibrational spectrum
# mode      symmetry      wave number      IR intensity      selection rules
#          #          cm** (-1)        km/mol           IR      RAMAN
  1          0.00          0.00000          0.00000          -      -
  2          0.00          0.00000          0.00000          -      -
  3          0.00          0.00000          0.00000          -      -
  4          0.00          0.00000          0.00000          -      -
  5          0.00          0.00000          0.00000          -      -
  6          0.00          0.00000          0.00000          -      -
  7          e          37.45          0.15171          YES     YES
  8          e          37.45          0.15171          YES     YES
  9          e          94.80          0.06903          YES     YES
 10         e          94.80          0.06903          YES     YES
 11         a1         106.36         0.94866          YES     YES
 12         e          106.45         0.06163          YES     YES
 13         e          106.45         0.06163          YES     YES
 14         a2         342.26         0.00000          NO      NO
 15         e          346.39         0.11886          YES     YES
 16         e          346.39         0.11886          YES     YES
 17         e          378.04         7.18260          YES     YES
 18         e          378.04         7.18260          YES     YES
 19         a1         396.38         0.00075          YES     YES
 20         e          432.65         5.94459          YES     YES
 21         e          432.65         5.94459          YES     YES
 22         a1         437.76         0.96428          YES     YES
 23         a1         493.70         23.35968         YES     YES
 24         e          529.47         5.78819          YES     YES
  
```

|    |    |         |           |     |     |
|----|----|---------|-----------|-----|-----|
| 25 | e  | 529.47  | 5.78819   | YES | YES |
| 26 | a1 | 618.96  | 82.18842  | YES | YES |
| 27 | e  | 667.59  | 92.33210  | YES | YES |
| 28 | e  | 667.59  | 92.33210  | YES | YES |
| 29 | a1 | 1955.56 | 856.07511 | YES | YES |
| 30 | e  | 2097.55 | 689.31745 | YES | YES |
| 31 | e  | 2097.55 | 689.31745 | YES | YES |
| 32 | a1 | 2112.71 | 216.92820 | YES | YES |
| 33 | a1 | 2157.63 | 57.80197  | YES | YES |

§end

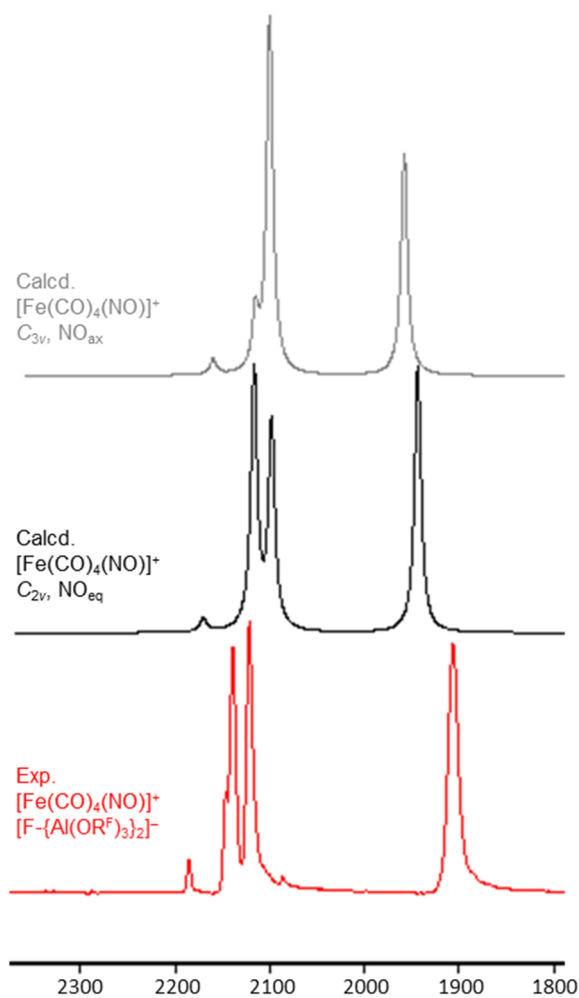

Supplementary Figure 27. Comparison of calculated and experimental IR spectra of 1. Only the CO/NO region is shown.

**[Fe(CO)(NO)<sub>3</sub>]<sup>+</sup> (C<sub>3v</sub> symmetry @BP86-D3BJ/def2-TZVPP)**

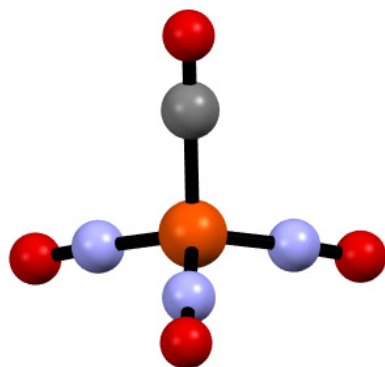

```

$coord
-0.0000000000000000 0.0000000000000000 0.24725638522662 fe
-1.54999255674679 -2.68466585963901 1.09014987083261 n
0.0000000000000000 0.0000000000000000 -3.31102864973505 c
-1.54999255674679 2.68466585963901 1.09014987083261 n
3.09998511349359 0.0000000000000000 1.09014987083261 n
0.0000000000000000 0.0000000000000000 -5.45718570748089 o
-2.57517766763481 -4.46033855886023 1.75016945316387 o
5.15035533526963 0.0000000000000000 1.75016945316387 o
-2.57517766763481 4.46033855886023 1.75016945316387 o

```

\$end

\$vibrational spectrum

| #  | mode | symmetry | wave number<br>cm** (-1) | IR intensity<br>km/mol | selection rules |       |
|----|------|----------|--------------------------|------------------------|-----------------|-------|
| #  |      |          |                          |                        | IR              | RAMAN |
| 1  |      |          | -0.00                    | 0.00000                | -               | -     |
| 2  |      |          | -0.00                    | 0.00000                | -               | -     |
| 3  |      |          | 0.00                     | 0.00000                | -               | -     |
| 4  |      |          | 0.00                     | 0.00000                | -               | -     |
| 5  |      |          | 0.00                     | 0.00000                | -               | -     |
| 6  |      |          | 0.00                     | 0.00000                | -               | -     |
| 7  |      | e        | 68.30                    | 0.09261                | YES             | YES   |
| 8  |      | e        | 68.30                    | 0.09261                | YES             | YES   |
| 9  |      | a1       | 73.57                    | 0.01693                | YES             | YES   |
| 10 |      | e        | 83.91                    | 0.00478                | YES             | YES   |
| 11 |      | e        | 83.91                    | 0.00478                | YES             | YES   |
| 12 |      | a2       | 283.14                   | 0.00000                | NO              | NO    |
| 13 |      | e        | 306.44                   | 0.08598                | YES             | YES   |
| 14 |      | e        | 306.44                   | 0.08598                | YES             | YES   |
| 15 |      | a1       | 405.12                   | 10.40445               | YES             | YES   |
| 16 |      | e        | 467.32                   | 13.60844               | YES             | YES   |
| 17 |      | e        | 467.32                   | 13.60844               | YES             | YES   |
| 18 |      | a1       | 526.15                   | 4.88199                | YES             | YES   |
| 19 |      | e        | 568.63                   | 16.33473               | YES             | YES   |
| 20 |      | e        | 568.63                   | 16.33473               | YES             | YES   |
| 21 |      | e        | 624.80                   | 91.69973               | YES             | YES   |
| 22 |      | e        | 624.80                   | 91.69973               | YES             | YES   |
| 23 |      | a1       | 682.98                   | 76.18859               | YES             | YES   |
| 24 |      | e        | 1919.39                  | 1179.43145             | YES             | YES   |
| 25 |      | e        | 1919.39                  | 1179.43145             | YES             | YES   |
| 26 |      | a1       | 1985.82                  | 332.02390              | YES             | YES   |
| 27 |      | a1       | 2138.62                  | 308.66085              | YES             | YES   |

\$end

## AIM analysis

For the QTAIM calculations (QTAIM = Quantum Theory of Atoms In Molecules) the multifunctional wavefunction analyzer Multiwfn was employed.<sup>[23]</sup> wfn input files were generated by single-point calculations on the B3LYP-D3BJ/def2-TZVPP level of theory employing TURBOMOLE. A basin analysis (options 17 + 1) has been performed on the electron density (option 1) employing a high quality grid (spacing = 0.06 Bohr, option 3). The electron density has been integrated with atomic-center + uniform grids and with exact refinement of the basin boundaries (options 7 + 2 + 1). As a result, the atomic charges after normalization are given.

The atomic charges after normalization and atomic volumes:

### **[Fe (CO)<sub>4</sub> (NO)]<sup>+</sup> (C<sub>3v</sub>, NO<sub>ax</sub>, E<sub>rel.</sub> = +45 kJ/mol)**

|        |         |           |         |                           |
|--------|---------|-----------|---------|---------------------------|
| 1 (Fe) | Charge: | 0.894687  | Volume: | 74.304 Bohr <sup>3</sup>  |
| 2 (C)  | Charge: | 1.028693  | Volume: | 76.441 Bohr <sup>3</sup>  |
| 3 (C)  | Charge: | 1.028693  | Volume: | 76.441 Bohr <sup>3</sup>  |
| 4 (N)  | Charge: | 0.235497  | Volume: | 81.211 Bohr <sup>3</sup>  |
| 5 (C)  | Charge: | 1.056015  | Volume: | 66.588 Bohr <sup>3</sup>  |
| 6 (C)  | Charge: | 1.026304  | Volume: | 76.436 Bohr <sup>3</sup>  |
| 7 (O)  | Charge: | -1.012657 | Volume: | 125.420 Bohr <sup>3</sup> |
| 8 (O)  | Charge: | -0.197147 | Volume: | 103.584 Bohr <sup>3</sup> |
| 9 (O)  | Charge: | -1.017820 | Volume: | 126.436 Bohr <sup>3</sup> |
| 10 (O) | Charge: | -1.021133 | Volume: | 126.445 Bohr <sup>3</sup> |
| 11 (O) | Charge: | -1.021133 | Volume: | 126.445 Bohr <sup>3</sup> |

### **[Fe (CO)<sub>4</sub> (NO)]<sup>+</sup> (C<sub>2v</sub>, NO<sub>eq</sub>, E<sub>rel.</sub> = 0 kJ/mol)**

|        |         |           |         |                           |
|--------|---------|-----------|---------|---------------------------|
| 1 (Fe) | Charge: | 0.934523  | Volume: | 72.439 Bohr <sup>3</sup>  |
| 2 (N)  | Charge: | 0.239864  | Volume: | 86.543 Bohr <sup>3</sup>  |
| 3 (C)  | Charge: | 1.024855  | Volume: | 74.863 Bohr <sup>3</sup>  |
| 4 (C)  | Charge: | 1.024855  | Volume: | 74.863 Bohr <sup>3</sup>  |
| 5 (C)  | Charge: | 1.053088  | Volume: | 70.277 Bohr <sup>3</sup>  |
| 6 (C)  | Charge: | 1.053088  | Volume: | 70.277 Bohr <sup>3</sup>  |
| 7 (O)  | Charge: | -0.258832 | Volume: | 104.858 Bohr <sup>3</sup> |
| 8 (O)  | Charge: | -1.023555 | Volume: | 126.555 Bohr <sup>3</sup> |
| 9 (O)  | Charge: | -1.023554 | Volume: | 126.555 Bohr <sup>3</sup> |
| 10 (O) | Charge: | -1.012166 | Volume: | 125.616 Bohr <sup>3</sup> |
| 11 (O) | Charge: | -1.012166 | Volume: | 125.616 Bohr <sup>3</sup> |

### **[Fe (CO) (NO)<sub>3</sub>]<sup>+</sup> (C<sub>3v</sub>)**

|        |         |           |         |                           |
|--------|---------|-----------|---------|---------------------------|
| 1 (Fe) | Charge: | 1.049618  | Volume: | 83.258 Bohr <sup>3</sup>  |
| 2 (N)  | Charge: | 0.214417  | Volume: | 90.453 Bohr <sup>3</sup>  |
| 3 (C)  | Charge: | 1.034258  | Volume: | 81.994 Bohr <sup>3</sup>  |
| 4 (N)  | Charge: | 0.214416  | Volume: | 90.453 Bohr <sup>3</sup>  |
| 5 (N)  | Charge: | 0.217405  | Volume: | 90.415 Bohr <sup>3</sup>  |
| 6 (O)  | Charge: | -1.024933 | Volume: | 126.488 Bohr <sup>3</sup> |
| 7 (O)  | Charge: | -0.234048 | Volume: | 104.552 Bohr <sup>3</sup> |
| 8 (O)  | Charge: | -0.237085 | Volume: | 104.552 Bohr <sup>3</sup> |
| 9 (O)  | Charge: | -0.234048 | Volume: | 104.552 Bohr <sup>3</sup> |

### **[Co (CO)<sub>5</sub>]<sup>+</sup> (D<sub>3h</sub>)**

|        |         |           |         |                           |
|--------|---------|-----------|---------|---------------------------|
| 1 (Co) | Charge: | 0.740927  | Volume: | 75.755 Bohr <sup>3</sup>  |
| 2 (C)  | Charge: | 1.057833  | Volume: | 75.557 Bohr <sup>3</sup>  |
| 3 (C)  | Charge: | 1.057830  | Volume: | 75.557 Bohr <sup>3</sup>  |
| 4 (C)  | Charge: | 1.061765  | Volume: | 75.485 Bohr <sup>3</sup>  |
| 5 (C)  | Charge: | 1.080244  | Volume: | 68.513 Bohr <sup>3</sup>  |
| 6 (C)  | Charge: | 1.080248  | Volume: | 68.513 Bohr <sup>3</sup>  |
| 7 (O)  | Charge: | -1.011064 | Volume: | 125.358 Bohr <sup>3</sup> |
| 8 (O)  | Charge: | -1.016972 | Volume: | 126.282 Bohr <sup>3</sup> |
| 9 (O)  | Charge: | -1.019874 | Volume: | 126.370 Bohr <sup>3</sup> |



|         |         |           |         |                |
|---------|---------|-----------|---------|----------------|
| 10 (O ) | Charge: | -1.019870 | Volume: | 126.370 Bohr^3 |
| 11 (O ) | Charge: | -1.011067 | Volume: | 125.358 Bohr^3 |

**[Mn (NO)<sub>4</sub>]<sup>+</sup> (T<sub>d</sub>)**

|        |         |           |         |                |
|--------|---------|-----------|---------|----------------|
| 1 (Mn) | Charge: | 1.227927  | Volume: | 79.894 Bohr^3  |
| 2 (N ) | Charge: | 0.181712  | Volume: | 92.564 Bohr^3  |
| 3 (N ) | Charge: | 0.181714  | Volume: | 92.564 Bohr^3  |
| 4 (N ) | Charge: | 0.181712  | Volume: | 92.564 Bohr^3  |
| 5 (N ) | Charge: | 0.181712  | Volume: | 92.564 Bohr^3  |
| 6 (O ) | Charge: | -0.238695 | Volume: | 104.799 Bohr^3 |
| 7 (O ) | Charge: | -0.238696 | Volume: | 104.799 Bohr^3 |
| 8 (O ) | Charge: | -0.238693 | Volume: | 104.799 Bohr^3 |
| 9 (O ) | Charge: | -0.238693 | Volume: | 104.799 Bohr^3 |

**[Co (CO)<sub>2</sub> (NO)<sub>2</sub>]<sup>+</sup> (C<sub>2v</sub>)**

|        |         |           |         |                |
|--------|---------|-----------|---------|----------------|
| 1 (Co) | Charge: | 0.872674  | Volume: | 87.764 Bohr^3  |
| 2 (N ) | Charge: | 0.258136  | Volume: | 89.636 Bohr^3  |
| 3 (N ) | Charge: | 0.258123  | Volume: | 89.636 Bohr^3  |
| 4 (C ) | Charge: | 1.056014  | Volume: | 81.222 Bohr^3  |
| 5 (C ) | Charge: | 1.056015  | Volume: | 81.222 Bohr^3  |
| 6 (O ) | Charge: | -0.227424 | Volume: | 103.865 Bohr^3 |
| 7 (O ) | Charge: | -0.227423 | Volume: | 103.865 Bohr^3 |
| 8 (O ) | Charge: | -1.023057 | Volume: | 126.406 Bohr^3 |
| 9 (O ) | Charge: | -1.023057 | Volume: | 126.406 Bohr^3 |

## Gas Phase and Solution Reaction Enthalpies

Supplementary Table 3. Gas phase and COSMO solution thermodynamics in CH<sub>2</sub>Cl<sub>2</sub> (ε = 8.93) and oDFB (ε = 13.8).

| Reaction                                                                                      | ΔH°(gas) | BP86<br>ΔG°(solv)               |      | ΔH°(gas) | B3LYP<br>ΔG°(solv)              |      |
|-----------------------------------------------------------------------------------------------|----------|---------------------------------|------|----------|---------------------------------|------|
|                                                                                               |          | CH <sub>2</sub> Cl <sub>2</sub> | oDFB |          | CH <sub>2</sub> Cl <sub>2</sub> | oDFB |
| Fe(CO) <sub>5</sub> + NO <sup>+</sup> → [Fe(CO) <sub>4</sub> (NO)] <sup>+</sup> + CO          | -213     | -103                            | -96  | -219     | -110                            | -103 |
| Fe(CO) <sub>5</sub> + NO <sup>+</sup> + 2NO → [Fe(CO)(NO) <sub>3</sub> ] <sup>+</sup> + 4CO   | -260     | -190                            | -183 | -197     | -127                            | -120 |
| [Fe(CO) <sub>4</sub> (NO)] <sup>+</sup> + 2NO → [Fe(CO)(NO) <sub>3</sub> ] <sup>+</sup> + 3CO | -47      | -87                             | -87  | +22      | -18                             | -18  |

| Molecule                                                   | BP86 energies (kJ mol <sup>-1</sup> ) |              |               |                                            |                  |  |
|------------------------------------------------------------|---------------------------------------|--------------|---------------|--------------------------------------------|------------------|--|
|                                                            | Enthalpy H                            | freeH energy | freeH entropy | CH <sub>2</sub> Cl <sub>2</sub> , ε = 8.93 | oDFB, ε = 13.8   |  |
|                                                            |                                       |              |               | COSMO energy                               | COSMO energy     |  |
| Fe(CO) <sub>5</sub> (D <sub>3h</sub> )                     | -4807274.1937358200                   | 139.720      | 0.445790      | -1831.0513838031                           | -1831.0516380071 |  |
| CO (C <sub>∞v</sub> )                                      | -297620.9347443340                    | 18.910       | 0.197890      | -113.3667511377                            | -113.3668061814  |  |
| NO (C <sub>2v</sub> )                                      | -341192.7487023620                    | 17.470       | 0.199780      | -129.9619266897                            | -129.9619870253  |  |
| NO <sup>+</sup> (C <sub>∞v</sub> )                         | -340264.7504791870                    | 20.320       | 0.198440      | -129.7224232666                            | -129.7297605215  |  |
| [Fe(CO) <sub>4</sub> (NO)] <sup>+</sup> (C <sub>2v</sub> ) | -4850130.8947143500                   | 140.140      | 0.457830      | -1847.4446335846                           | -1847.4494952486 |  |
| [Fe(CO)(NO) <sub>3</sub> ] <sup>+</sup> (C <sub>3v</sub> ) | -4639700.6116683000                   | 110.480      | 0.412860      | -1767.2852293669                           | -1767.2900975994 |  |

| Molecule                                                   | B3LYP energies (kJ mol <sup>-1</sup> ) |              |               |                                            |                  |  |
|------------------------------------------------------------|----------------------------------------|--------------|---------------|--------------------------------------------|------------------|--|
|                                                            | Enthalpy H                             | freeH energy | freeH entropy | CH <sub>2</sub> Cl <sub>2</sub> , ε = 8.93 | oDFB, ε = 13.8   |  |
|                                                            |                                        |              |               | COSMO energy                               | COSMO energy     |  |
| Fe(CO) <sub>5</sub> (D <sub>3h</sub> )                     | -4805540.54803954                      | 141.740      | 0.445290      | -1830.3925929252                           | -1830.3929019448 |  |
| CO (C <sub>∞v</sub> )                                      | -297476.31921281                       | 19.430       | 0.197720      | -113.3119230922                            | -113.3119815473  |  |
| NO (C <sub>2v</sub> )                                      | -341010.51564983                       | 18.020       | 0.199580      | -129.8927231012                            | -129.8927828069  |  |
| NO <sup>+</sup> (C <sub>∞v</sub> )                         | -340084.09190075                       | 21.050       | 0.198240      | -129.6540344915                            | -129.6613804183  |  |
| [Fe(CO) <sub>4</sub> (NO)] <sup>+</sup> (C <sub>2v</sub> ) | -4848366.95541261                      | 142.340      | 0.458640      | -1846.7745986457                           | -1846.7795209233 |  |
| [Fe(CO)(NO) <sub>3</sub> ] <sup>+</sup> (C <sub>3v</sub> ) | -4637937.31977398                      | 112.850      | 0.410580      | -1766.6156184687                           | -1766.6205644599 |  |

## 10. References

- [1] A. Reisinger, *Chemistry with weakly coordinating anions. Strong Brønsted acids and group 11 metal complexes.*, Dissertation, University of Freiburg (Breisgau), 2006, Cuvillier, Göttingen, **2007**.
- [2] M. Rohde, L. O. Müller, D. Himmel, H. Scherer, I. Krossing, *Chem. Eur. J.* **2014**, *20*, 1218.
- [3] a) A. Martens, P. Weis, M. C. Krummer, M. Kreuzer, A. Meierhöfer, S. C. Meier, J. Bohnenberger, H. Scherer, I. Riddlestone, I. Krossing, *Chem. Sci.* **2018**, *9*, 7058; b) J. Bohnenberger, B. Derstine, M. Daub, I. Krossing, *Angew. Chem. Int. Ed.* **2019**, *58*, 9586.
- [4] G. Saielli, R. Bini, A. Bagno, *RSC Adv.* **2014**, *4*, 41605.
- [5] SAINT V8.37A **2015**, Bruker AXS, Madison, Wisconsin, USA.
- [6] L. Krause, R. Herbst-Irmer, G. M. Sheldrick, D. Stalke, *J. Appl. Crystallogr.* **2015**, *48*, 3.
- [7] G. M. Sheldrick, *Acta Cryst. A* **2015**, *71*, 3.
- [8] G. M. Sheldrick, *Acta Cryst. A* **2008**, *64*, 112.
- [9] G. M. Sheldrick, *Acta Cryst. C* **2015**, *71*, 3.
- [10] C. B. Hübschle, G. M. Sheldrick, B. Dittrich, *J. Appl. Crystallogr.* **2011**, *44*, 1281.
- [11] D. Kratzert, J. J. Holstein, I. Krossing, *J. Appl. Crystallogr.* **2015**, *48*, 933.
- [12] C. F. Macrae, I. J. Bruno, J. A. Chisholm, P. R. Edgington, P. McCabe, E. Pidcock, L. Rodriguez-Monge, R. Taylor, J. van de Streek, P. A. Wood, *J. Appl. Crystallogr.* **2008**, *41*, 466.
- [13] O. V. Dolomanov, L. J. Bourhis, R. J. Gildea, J. A. K. Howard, H. Puschmann, *J. Appl. Crystallogr.* **2009**, *42*, 339.
- [14] a) R. Ahlrichs, M. Bär, M. Häser, H. Horn, C. Kölmel, *Chem. Phys. Lett.* **1989**, *162*, 165; b) O. Treutler, R. Ahlrichs, *J. Chem. Phys.* **1995**, *102*, 346.
- [15] a) J. P. Perdew, *Phys. Rev. B* **1986**, *33*, 8822; b) J. P. Perdew, *Phys. Rev. B* **1986**, *34*, 7406.
- [16] a) A. D. Becke, *J. Chem. Phys.* **1993**, *98*, 5648; b) C. Lee, W. Yang, R. G. Parr, *Phys. Rev. B* **1988**, *37*, 785.
- [17] a) M. Sierka, A. Hogekamp, R. Ahlrichs, *J. Chem. Phys.* **2003**, *118*, 9136; b) R. Ahlrichs, *Phys. Chem. Chem. Phys.* **2004**, *6*, 5119.
- [18] F. Weigend, R. Ahlrichs, *Phys. Chem. Chem. Phys.* **2005**, *7*, 3297.
- [19] a) S. Grimme, J. Antony, S. Ehrlich, H. Krieg, *J. Chem. Phys.* **2010**, *132*, 154104; b) S. Grimme, S. Ehrlich, L. Goerigk, *J. Comput. Chem.* **2011**, *32*, 1456.
- [20] P. Deglmann, F. Furche, R. Ahlrichs, *Chem. Phys. Lett.* **2002**, *362*, 511.
- [21] A. J. Lehner, N. Trapp, H. Scherer, I. Krossing, *Dalton Trans.* **2011**, *40*, 1448.

- [22] Z. Iqbal, T. C. Waddington, *J. Chem. Soc., A* **1968**, 2958.
- [23] T. Lu, F. Chen, *J. Comput. Chem.* **2012**, 33, 580.
